# Supplementary material
Source: PubMed Central journal article supplement (PMC4965582)

Mapping Sites of *O*-Glycosylation and Fringe Elongation on *Drosophila* Notch

**Beth M. Harvey<sup>#1</sup>, Nadia A. Rana<sup>#1</sup>, Hillary Moss<sup>1</sup>, Jessica Leonardi<sup>2</sup>, Hamed Jafar-Nejad<sup>2</sup>, Robert S. Haltiwanger<sup>\*1</sup>**

From the <sup>1</sup>Department of Biochemistry and Cell Biology, Stony Brook University, Stony Brook, New York 11794-5215, the <sup>2</sup>Program in Developmental Biology, Baylor College of Medicine, Houston, TX 77030, and the <sup>3</sup>Department of Molecular and Human Genetics, Baylor College of Medicine, Houston, TX 77030

<sup>#</sup>Both authors contributed equally to this work.

<sup>\*</sup>Current address: Complex Carbohydrate Research Center, University of Georgia, Athens, GA 30602-4712

Running title: Mapping *O*-Glycosylation on *Drosophila* Notch

To whom correspondence should be addressed: Robert S. Haltiwanger, Complex Carbohydrate Research Center, University of Georgia, Athens, GA, USA, Tel.: (706) 542-4151; E-mail: [rhalti@uga.edu](mailto:rhalti@uga.edu)

**Keywords:** Notch receptor, Fringe, EGF repeat, *O*-fucose, *O*-glucose, *O*-GlcNAc, mass spectrometry

---

### Supplemental Figures

#### Supplemental Figure 1. ***O*-Fucosylation sites are elongated by Fringe to varying degrees.**

MRM analyses showing the relative levels of unmodified (black line), *O*-fucose monosaccharide (red line) and *O*-fucose disaccharide (blue line) of several peptides containing predicted *O*-fucose sites in the absence of Fringe (*A-H*) and presence of Fringe (*A'-H'*). List of peptides searched in each EIC are in Table 1, and corresponding spectra are in Fig. S3. *A, A'* (EGF3); *B, B'* (EGF5); *C, C'* (EGF7); *D, D'* (EGF8); *E, E'* (EGF9); *F, F'* (EGF21); *G, G'* (EGF28); *H, H'* (EGF31). Red triangle represents fucose (dHexose). Blue square is GlcNAc (HexNAc).

#### Supplemental Figure 2. **Sequence alignments of *O*-glycosylated EGF repeats**

Alignments of the amino acid sequences within and surrounding the current consensus sequences of *O*-glycosylation of EGF repeats containing *O*-fucose (*A-B*), *O*-glucose (*C*) and *O*-GlcNAc (*D*) sites shown using WebLogo (1). Sequences of the 22 EGF repeats containing *O*-fucose sites were organized into either four categories of approximate amounts of *O*-fucosylation based on EICs generated in the absence of Fringe (*A*) or four categories of fucose elongation from EICs generated in the presence of Fringe (*B*) (see Fig. 4). *C*, Sequences of the 18 EGF repeats containing *O*-glucose sites were organized into three categories of approximate amounts of glucose elongation based on EICs (see Fig. 5). *D*, Sequences of the 18 EGF repeats containing *O*-GlcNAc sites were organized into two categories of either having or not having apparent *O*-GlcNAc modification based on EICs (see Fig. 6).

#### Supplemental Figure 3. **Mass spectra of *O*-glycosylated peptides from *Drosophila* Notch**

*Drosophila* Notch was purified from S2 cells and prepared for mass spectral analyses. For each peptide, top panels show MS spectra at a specific retention time, and red diamonds indicate ions chosen for fragmentation. Parent ions corresponding to specified peptides are fragmented to produce MS2 spectra, shown in the bottom panels. Parent ions of the represented peptide are labeled with the charge state of the peptide in that specific spectrum. Other ions in the MS spectra are from co-eluting material. Blue diamonds in MS2 spectra indicate the position of the parent ion. Spectra representing the most glycosylated form of each peptide found in the MS/MS data are shown. For analyzing *O*-fucosylation, S2 cells were co-transfected with or without Fringe, and peptides containing an *O*-fucose consensus sequence were inspected in both conditions (-Fringe or +Fringe). Spectra analyzing *O*-glucosylation and *O*-

GlcNAcylation were taken from Notch generated in the absence of Fringe, except the EGF26 *O*-GlcNAc site. Tables to the right of spectra show the ions searched in EICs analyzing *O*-fucose, *O*-glucose and *O*-GlcNAc glycoforms in Figs. 3, 4A, 5A, 6A and Fig. 8 and MRM in Figs. 3 and S1. Red triangle represents fucose (dHexose). Blue circle is glucose (Hexose). Orange star is xylose (Pentose). Blue square is GlcNAc (HexNAc).

#### References

1. Crooks, G. E., Hon, G., Chandonia, J. M., and Brenner, S. E. (2004) WebLogo: a sequence logo generator. *Genome Res* **14**, 1188-1190

# Fig. S1

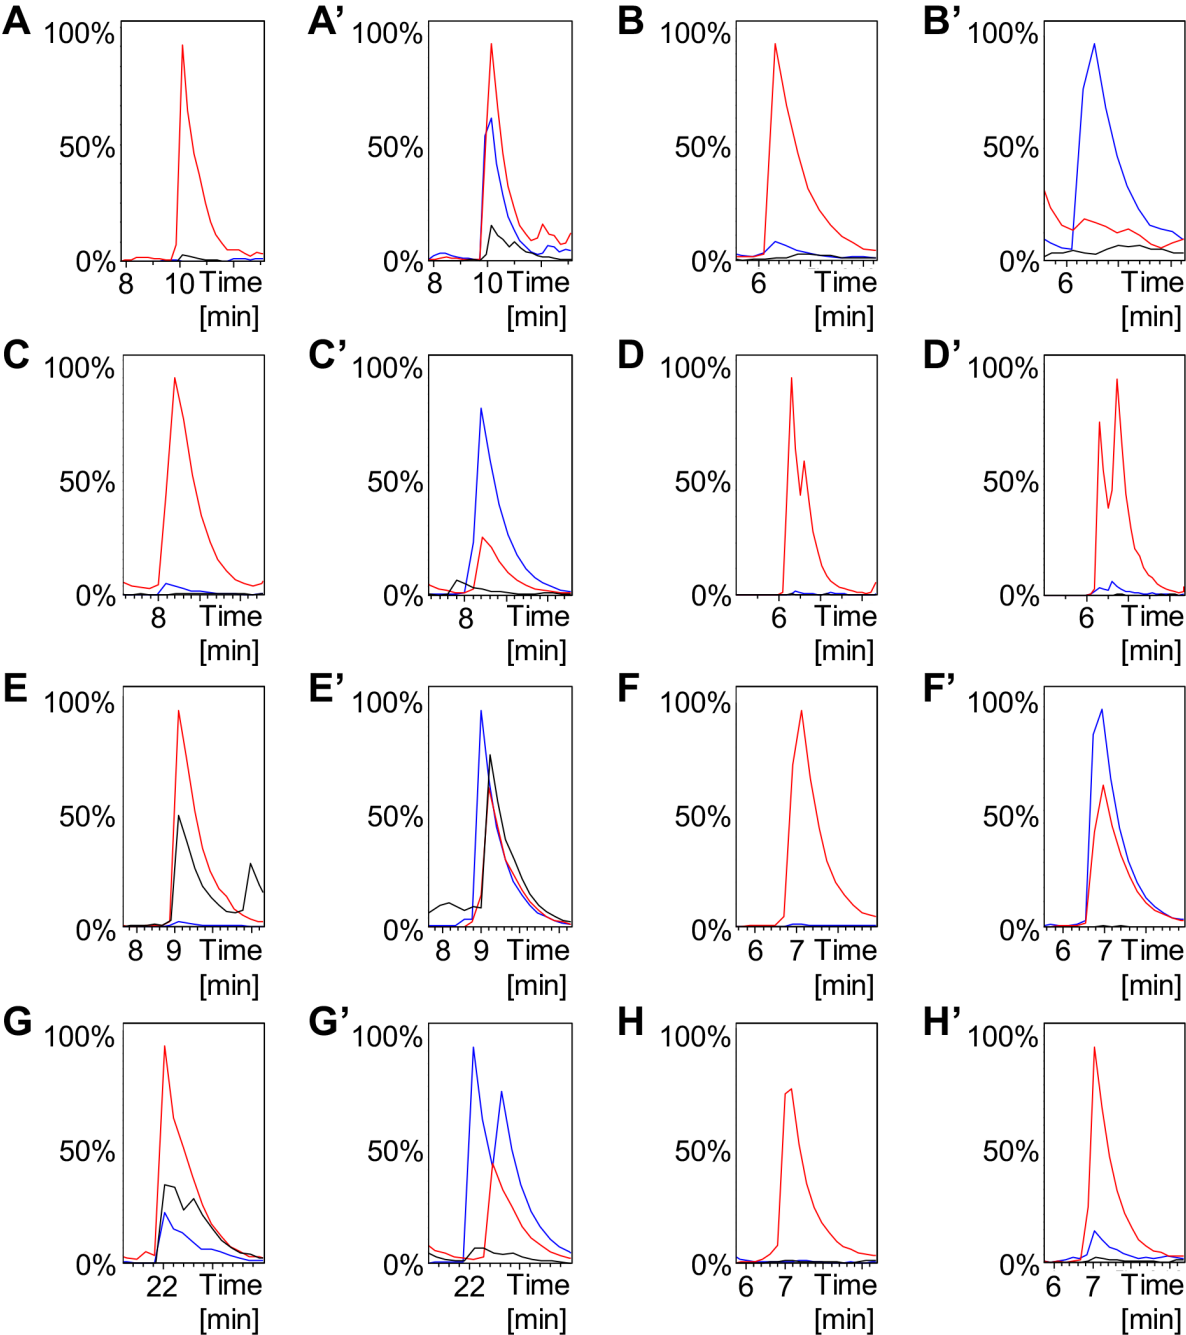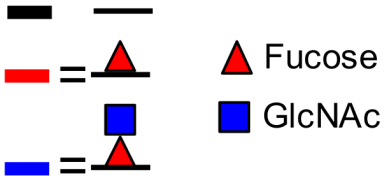

# Fig. S2, A

| O-Fucose Modification | EGF Repeat                                                                                               | EGF Sequence                                                                                              | Alignment |
|-----------------------|----------------------------------------------------------------------------------------------------------|-----------------------------------------------------------------------------------------------------------|-----------|
| <30%                  | 13                                                                                                       | DIDECQSNPCLNDGTC <sup>T</sup> CHDKINGFKSCALGF <sup>T</sup> GARCQ                                          |           |
| 30%-50%               | 2                                                                                                        | HRNPCNSMRCQNGGTC <sup>T</sup> QVTFRNRGRPGISCKCPLGFDES <sup>L</sup> LCE                                    |           |
|                       | 26                                                                                                       | NDEDCTESSCLNGGSC <sup>S</sup> CIDGINGYNCSCLAGYS <sup>S</sup> GANCO                                        |           |
| 60-80%                | 3                                                                                                        | VPNACDHVTC <sup>L</sup> NGGTC <sup>T</sup> QLK <sup>T</sup> L <sup>E</sup> EYTCACANGY <sup>T</sup> GERCE  |           |
|                       | 4                                                                                                        | TKNLCAS <sup>S</sup> PCRN <sup>G</sup> AT <sup>T</sup> CTALAGSSSFTCS <sup>C</sup> PPGF <sup>T</sup> GDTCS |           |
|                       | 8                                                                                                        | DVDECAQRDHPVCQNGA <sup>T</sup> CTNTHGSYSICVNGWAGLDCS                                                      |           |
|                       | 9                                                                                                        | NTDDCKQAACFYGA <sup>T</sup> CIDGVGSFYCQCTK <sup>G</sup> KLGLCH                                            |           |
|                       | 12                                                                                                       | NINECES <sup>H</sup> PCQNEGS <sup>S</sup> CLDDPGTFR <sup>C</sup> VCMPGF <sup>T</sup> GTQCE                |           |
|                       | 27                                                                                                       | KLNKCD <sup>S</sup> NPCLNGA <sup>T</sup> CHEQNNEYTCH <sup>C</sup> PSGF <sup>T</sup> GKQCS                 |           |
|                       | 32                                                                                                       | NKDDCKPGACHNNGS <sup>S</sup> CIDRVGGFECV <sup>C</sup> QPGFVGARCE                                          |           |
| ≥80%                  | 1                                                                                                        | VAASCTSVGCQNGGTC <sup>T</sup> V <sup>T</sup> QLNGKTYCACDSHYVGDYCE                                         |           |
|                       | 5                                                                                                        | DIEECQSNPCKYGGTC <sup>T</sup> CVNTHGSYQCMCPTGY <sup>T</sup> GKDCD                                         |           |
|                       | 7                                                                                                        | NYDDCLGHL <sup>C</sup> QNGGTC <sup>T</sup> CIDGISDYTCRCPPNF <sup>T</sup> GRFCQ                            |           |
|                       | 17                                                                                                       | NVNECH <sup>S</sup> NPCNNGA <sup>T</sup> CIDGINSYKQC <sup>V</sup> PGF <sup>T</sup> GQHCE                  |           |
|                       | 20                                                                                                       | DIDEC <sup>S</sup> SNPCQHG <sup>G</sup> TC <sup>T</sup> CYDKLNAFSCQ <sup>C</sup> MPGY <sup>T</sup> GQKCE  |           |
|                       | 21                                                                                                       | NIDDCVTN <sup>P</sup> CGNGGTC <sup>T</sup> CIDKVNGYKCVCKV <sup>P</sup> FTGRDCE                            |           |
|                       | 23                                                                                                       | DIDEC <sup>S</sup> LSSPCRN <sup>G</sup> AS <sup>S</sup> CLNVPGSYRCL <sup>T</sup> KGYEGRDCA                |           |
|                       | 24                                                                                                       | NTDDCAS <sup>F</sup> PCQNGGTC <sup>L</sup> LDGIGDYSCLCVDGFDGKHCE                                          |           |
|                       | 25                                                                                                       | DINECL <sup>S</sup> QPCQNGA <sup>T</sup> CSQYVNSYTCT <sup>C</sup> PLGF <sup>S</sup> GINCO                 |           |
|                       | 28                                                                                                       | YVDWCGQSPCENGA <sup>T</sup> CSQMKHQFS <sup>C</sup> KCSAGW <sup>T</sup> GKLCD                              |           |
|                       | 30                                                                                                       | EIDECQ <sup>S</sup> QPCQNGGTC <sup>T</sup> CRDLIGAYEC <sup>C</sup> ROGFQ <sup>G</sup> QONCE               |           |
| 31                    | NIDDCAPN <sup>P</sup> CQNGGTC <sup>T</sup> CHDRVMN <sup>F</sup> SCS <sup>C</sup> PPGT <sup>M</sup> GIICE |                                                                                                           |           |

# Fig. S2, B

| O-Fucose Elongation | EGF Repeat | EGF Sequence                              | Alignment |
|---------------------|------------|-------------------------------------------|-----------|
| <25%                | 2          | HRNPCNSMRQNGGTCQVTFRNGRPGISCKCPLGFDES LCE |           |
|                     | 13         | DIDECQSNPCLNDGTCCHDKINGFKSCALGFTGAR CQ    |           |
|                     | 26         | NDECTESSCLNGGSCIDGINGYNCSCLAGYSGAN CQ     |           |
|                     | 31         | NIDDCAPNPCQNGGTCCHDRV MNFSCSCPPGTMGI ICE  |           |
|                     | 32         | NKDDCKPGACHNNGSCIDRVGGFECV CQPGFVGARCE    |           |
| 25%-50%             | 3          | VPNACDHVTCNLGGTCQLKTL E EYTCACANGYTGERCE  |           |
|                     | 4          | TKNLCASSPCRNGATCTALAGSSSFTCS CPPGFTGDTCS  |           |
|                     | 9          | NTDDCKQAACFYGATCIDGVGSFYCQCTK GKTLGLLCH   |           |
|                     | 12         | NINECESHPCQNEGSCLD DDPGTFRCVCM PGFTGTQCE  |           |
|                     | 17         | NVNECHSNPCNNGATCIDGINSYK CQVPGFTGQHCE     |           |
|                     | 27         | KLNKCDSNPCLNGATCHEQNNEYTCHCPSGFTGKQCS     |           |
| 50%-75%             | 8          | DVDECAQRDHPVCQNGATCTNTHG SYSCICVNGWAGLDCS |           |
|                     | 20         | DIDECSSNPCQHGGTCYDKL NAFSCQCM PGYTGQKCE   |           |
|                     | 24         | NTDDCASFP CQNGGTCCLDGIGDYSCLCVDGFDGKHCE   |           |
|                     | 25         | DINECLSQPCQNGATCSQYVNSY TCTCPLGFSGINCQ    |           |
|                     | 28         | YVDWCGQSPCENGA TCSQMKHQFSCKCSAGW TGLCD    |           |
|                     | 30         | EIDECQSQPCQNGGTCRDLIGAYECQCRQGFQGNCE      |           |
| ≥75%                | 1          | VAASCTSVGCQNGGTCVTQLNGKTYCACDSHYVGDYCE    |           |
|                     | 5          | DIEECQSNPCKYGGTCV NTHGSYQCMCPTGYTGKDCD    |           |
|                     | 7          | NYDDCLGHL CQNGGTCIDGISDYTCRCPPNF TGRFCQ   |           |
|                     | 21         | NIDDCVTNPCGNGGTCIDKVN GYKCVCKVPFTGRDCE    |           |
|                     | 23         | DIDECSSLSPCRNGASCLNVP GSYRCLCTKGYEGRDCA   |           |

# Fig. S2, C

| O-Glucose Elongation | EGF Repeat | EGF Sequence                                                      | Alignment |
|----------------------|------------|-------------------------------------------------------------------|-----------|
| ≤10%                 | 4          | TKNLCA <u>S</u> SPCRNGA <u>T</u> CTALAGSSSFTCSPPGF <u>T</u> GDTCS |           |
|                      | 5          | DIIECQ <u>S</u> NPCKYGG <u>T</u> CVNTHGSYQCMCPTGY <u>T</u> GKDCD  |           |
|                      | 14         | NIDDCQ <u>S</u> QPCRNRGICHDSIAGYSCECPPGY <u>T</u> GTSC            |           |
|                      | 24         | NTDDCA <u>S</u> FPCQNGG <u>T</u> CLDGI GDYSCLCVDGFDGKHCE          |           |
|                      | 27         | KLNKCD <u>S</u> NPCLNGA <u>T</u> CHEQNN EYTCHCPSGF <u>T</u> GKQCS |           |
|                      | 30         | EIDECQ <u>S</u> QPCQNGG <u>T</u> CRDLI GAYECQCRQGFQGNCE           |           |
| 10—50%               | 35         | SGQDCD <u>S</u> NPVRVGN CVVADEGFGYRCEPRGTLGEHCE                   |           |
|                      | 10         | LDDACT <u>S</u> NPCHADAICDTSPINGSYACSCATGYKGVDCS                  |           |
|                      | 12         | NINECE <u>S</u> HPCQNEG <u>S</u> CLDDPGTFRCVCM PGFTGTQCE          |           |
|                      | 13         | DIDECQ <u>S</u> NPCLNDG <u>T</u> CHDKINGFKKSCALGF <u>T</u> GARCQ  |           |
|                      | 16         | QINECE <u>S</u> NP CQFDGHCQDRVGSYQCQAGTSGKNCE                     |           |
|                      | 17         | NVNECH <u>S</u> NP CNNGA <u>T</u> CIDGINSYKQCVP GF <u>T</u> GQHCE |           |
| >50%                 | 25         | DINECL <u>S</u> QPCQNGA <u>T</u> CSQYVNSYTCTCPLGFSGINCQ           |           |
|                      | 15         | NINDCD <u>S</u> NPCHRKCIDDVNSFKKCLDPGY <u>T</u> GYICQ             |           |
|                      | 18         | NVDECI <u>S</u> SPCANNGVCIDQVNGYKCECPRGFYDAHCL                    |           |
|                      | 20         | DVDECA <u>S</u> NP CVNEGRCE DGINEFICHCPPGY <u>T</u> GKRCE         |           |
|                      | 20         | DIDEC <u>S</u> NP CQHGG <u>T</u> CYDKLNAFSCQMPGY <u>T</u> GQKCE   |           |

# Fig. S2, D

| O-GlcNAc Modification | EGF Repeat | EGF Sequence                            | Alignment |
|-----------------------|------------|-----------------------------------------|-----------|
| No                    | 3          | VPNACDHVTCLNGGTCQLKTLLEEYTCACANGYTGERCE |           |
|                       | 4          | TKNLCASSPCRNGATCTALAGSSSFTCSPPGFTGDTCS  |           |
|                       | 5          | DIEECQSNPCYGGTCVNTHGSYQCMPTGYTGKDCD     |           |
|                       | 9          | NTDDCKQAACFYGATCIDGVGSFYCQCTKGTGLLCH    |           |
|                       | 13         | DIDECQSNPCLNDGTCHDKINGFKCSCALGFTGARCQ   |           |
|                       | 15         | NINDCDSNPCHRGKCIDVNSFKCLCDPGYTYGICQ     |           |
|                       | 16         | QINECESNPCQFDGHCQDRVGSYYCQCAGTSGKNCE    |           |
|                       | 17         | NVNECHSNPCNNGATCIDGINSYKQCVPGFTGQHCE    |           |
|                       | 19         | DVDECA SNPCVNEGRCE DGINEFICHCPPGYTGKRCE |           |
|                       | 22         | KMDPCASNRCKNEAKCTPSSNFLDFSTCKLGYTGRYCD  |           |
|                       | 25         | DINECLSQPCQNGATCSQYVNSYTCTCPLGFSGINCQ   |           |
|                       | 27         | KLNKCDSNPCLNGATCHEQNNEYTCHCPSGFTGKQCS   |           |
|                       | 28         | YVDWCGQSPCENGATCSQMKHQFSCKCSAGWTGKLCD   |           |
| Yes                   | 4          | TKNLCASSPCRNGATCTALAGSSSFTCSPPGFTGDTCS  |           |
|                       | 11         | DIDECDQGSPCEHNGICVNTPGSYRCNCSQGF TGPRCE |           |
|                       | 12         | NINECESHPCQNEGSCLD DPGTFRCVCM PGFTGTQCE |           |
|                       | 14         | NIDDCQSQPCRNRGICHDSIAGYSECEPPGYTGTSCE   |           |
|                       | 20         | DIDECSSNPCQHGGTCYDKLNAFSCQCM PGYTGQKCE  |           |

# Fig. S3, A

## EGF 1

N<sup>61</sup>SCTSVGCQNGGTCVTQLNGKTY<sup>82</sup>

-Fringe

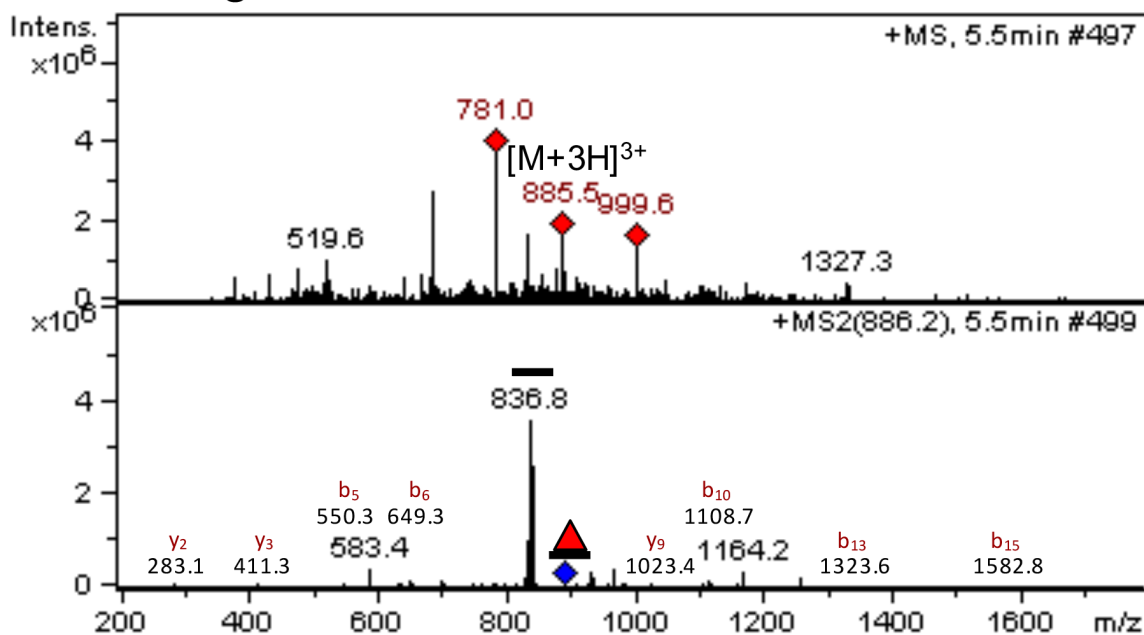

|   |              |
|---|--------------|
| — | 836.8;1254.7 |
| ▲ | 885.5;1327.7 |
| ■ | 953.2;1429.2 |

+Fringe

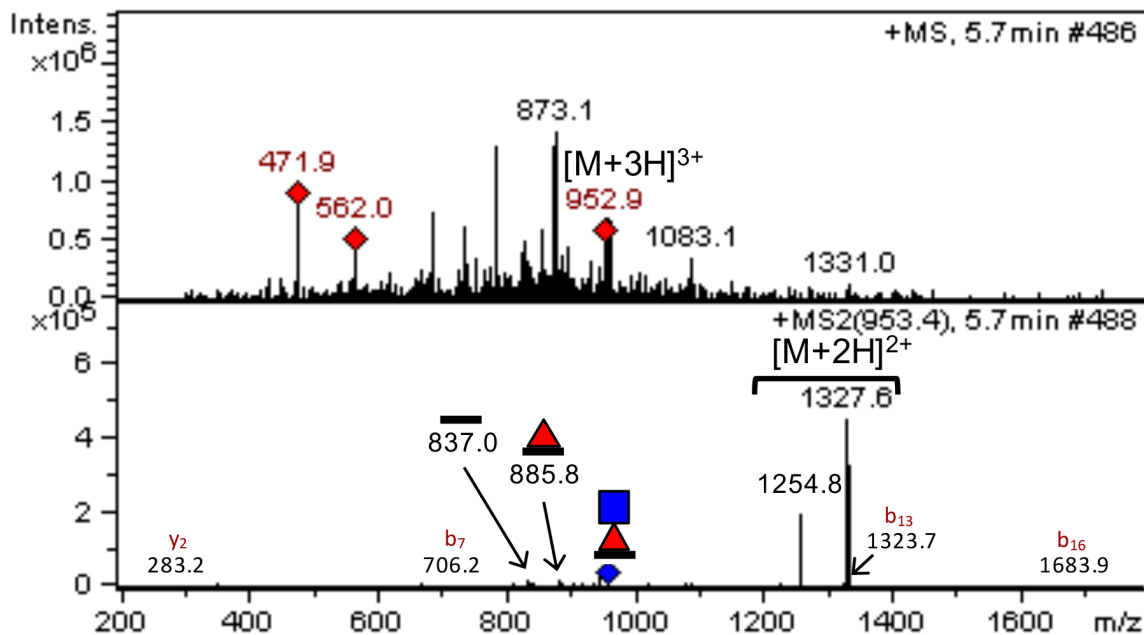

|   |              |
|---|--------------|
| — | 837.0;1254.8 |
| ▲ | 885.7;1327.8 |
| ■ | 954.4;1429.3 |



# Fig. S3, B

## EGF 2

<sup>104</sup>RCQNGGTCQVTF<sup>115</sup>

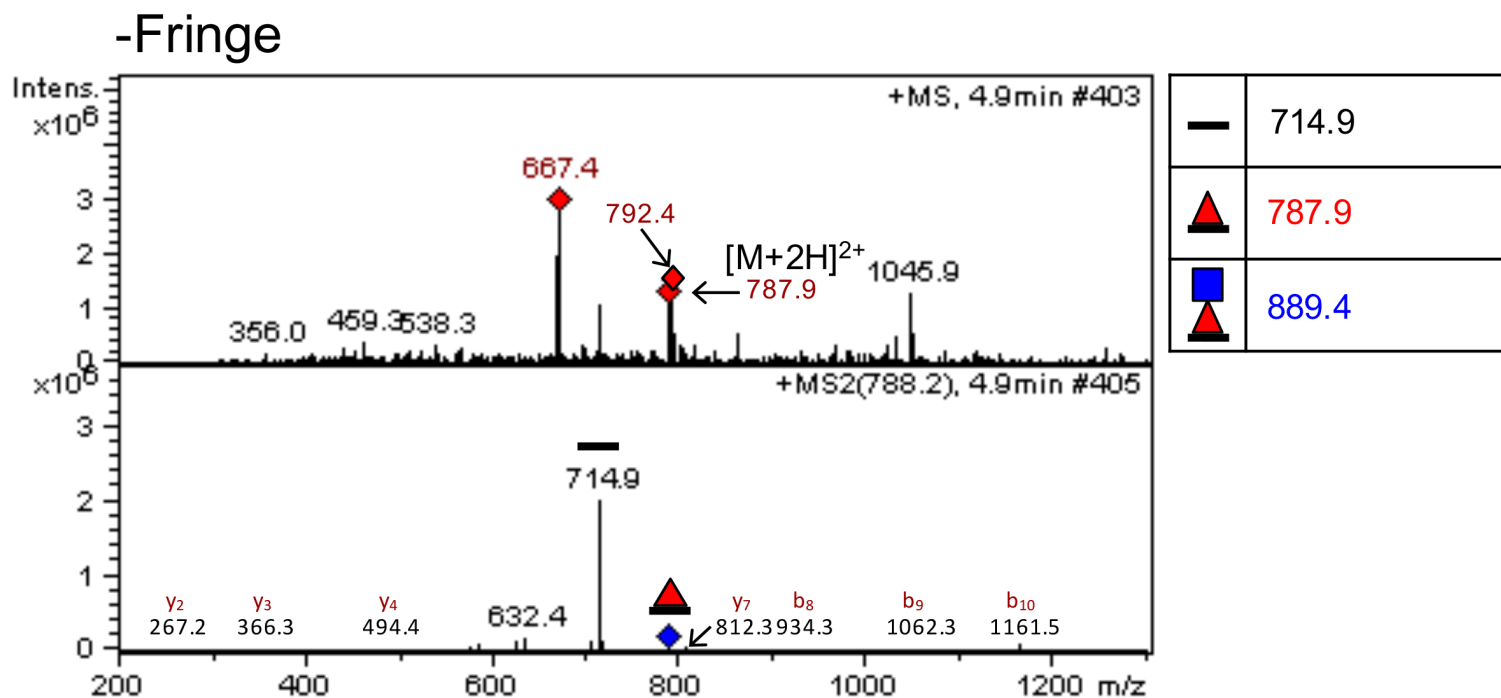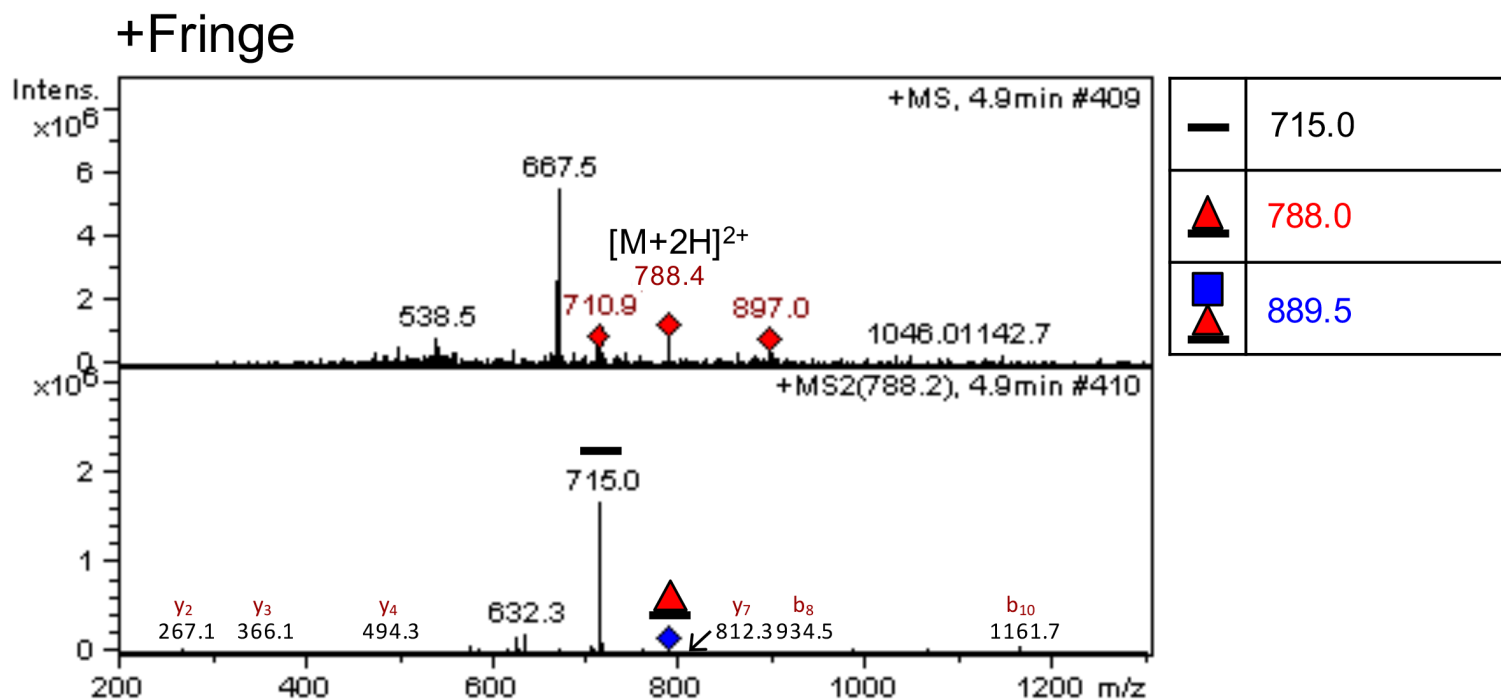

# Fig. S3, C

## EGF 3

$^{126}\text{CPLGFDES LCEI AVPNACDHVTCLNGGTCQLK}^{157}$

-Fringe

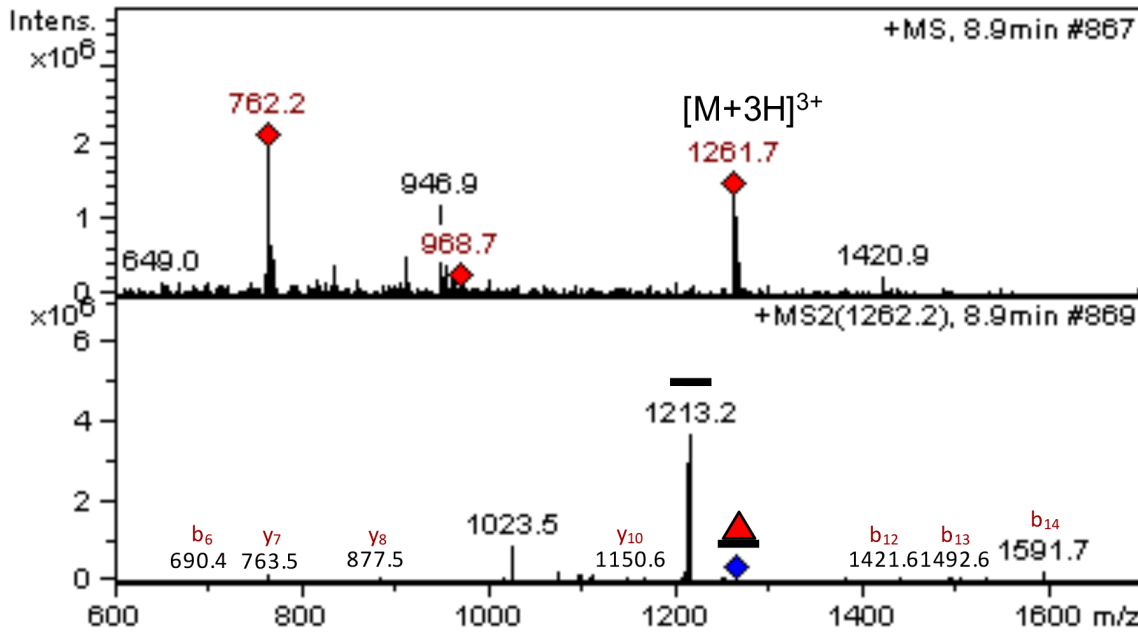

| For EICs |                |
|----------|----------------|
| —        | 1213.2;910.2   |
| ▲        | 1261.9;946.7   |
| ■        | 1329.6;997.4   |
| For MRM  |                |
| —        | 1214.0→i764.1  |
| ▲        | 1262.5→i1214.0 |
| ■        | 1330.3→i1214.0 |

+Fringe

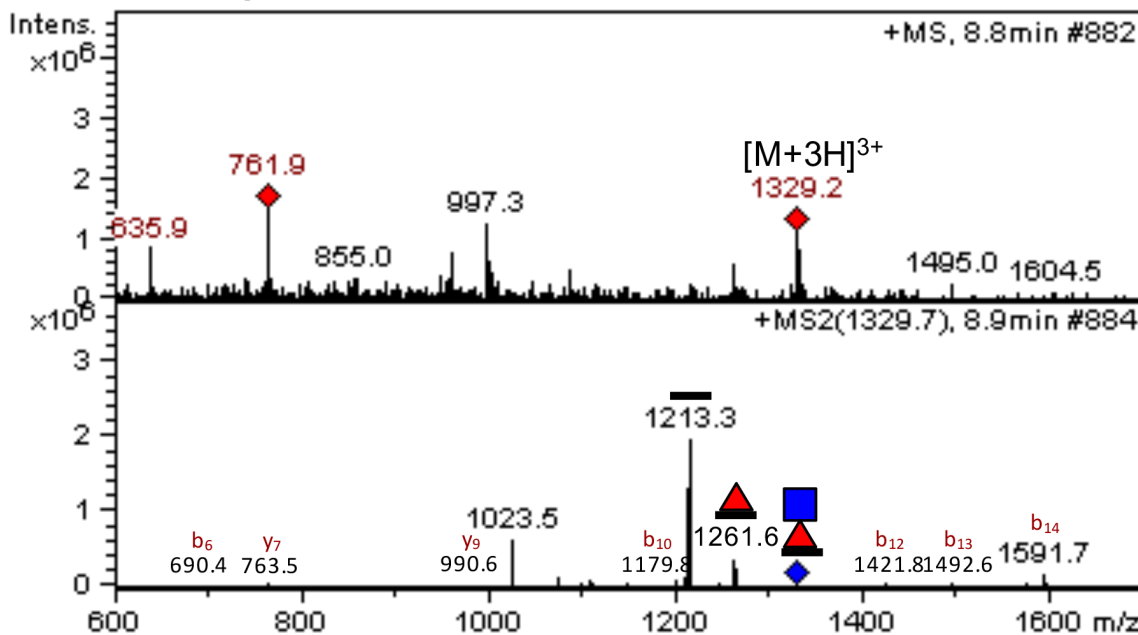

| For EICs |                |
|----------|----------------|
| —        | 1213.3;910.3   |
| ▲        | 1262.0;946.8   |
| ■        | 1329.7;997.5   |
| For MRM  |                |
| —        | 1214.0→i764.1  |
| ▲        | 1262.5→i1214.0 |
| ■        | 1330.3→i1214.0 |

# Fig. S3, D

## EGF 3

<sup>158</sup>TLEEYTCACANGY**T**GER<sup>174</sup>

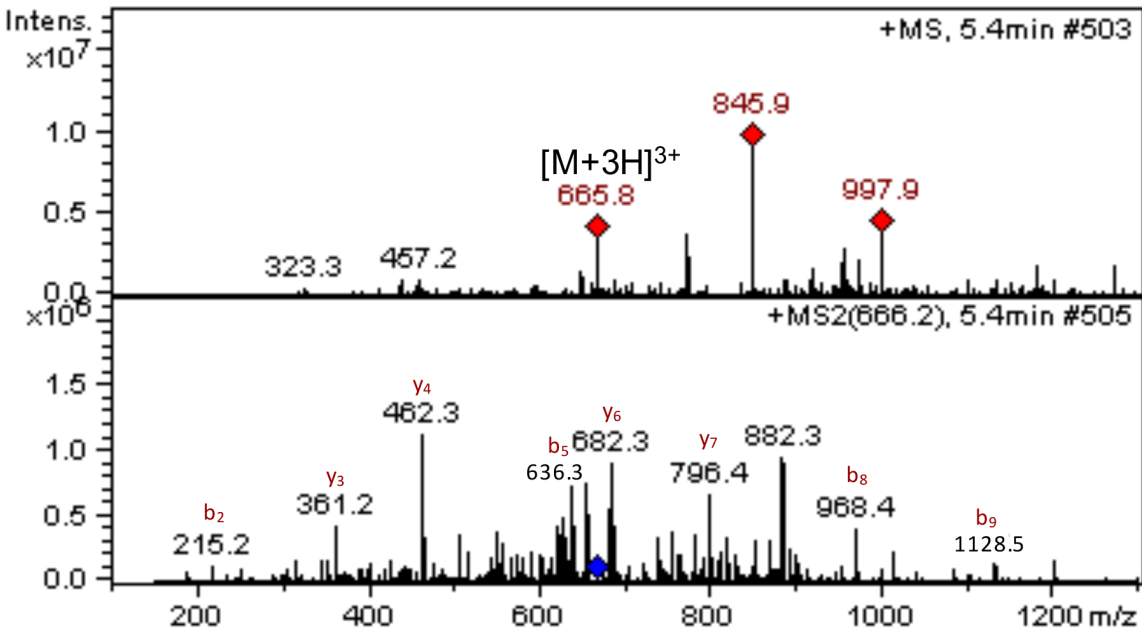

|   |              |
|---|--------------|
| — | 998.4;666.2  |
| ■ | 1099.9;733.9 |

# Fig. S3, E

## EGF 4

$^{179}\text{NLCASSPCR}^{187}$

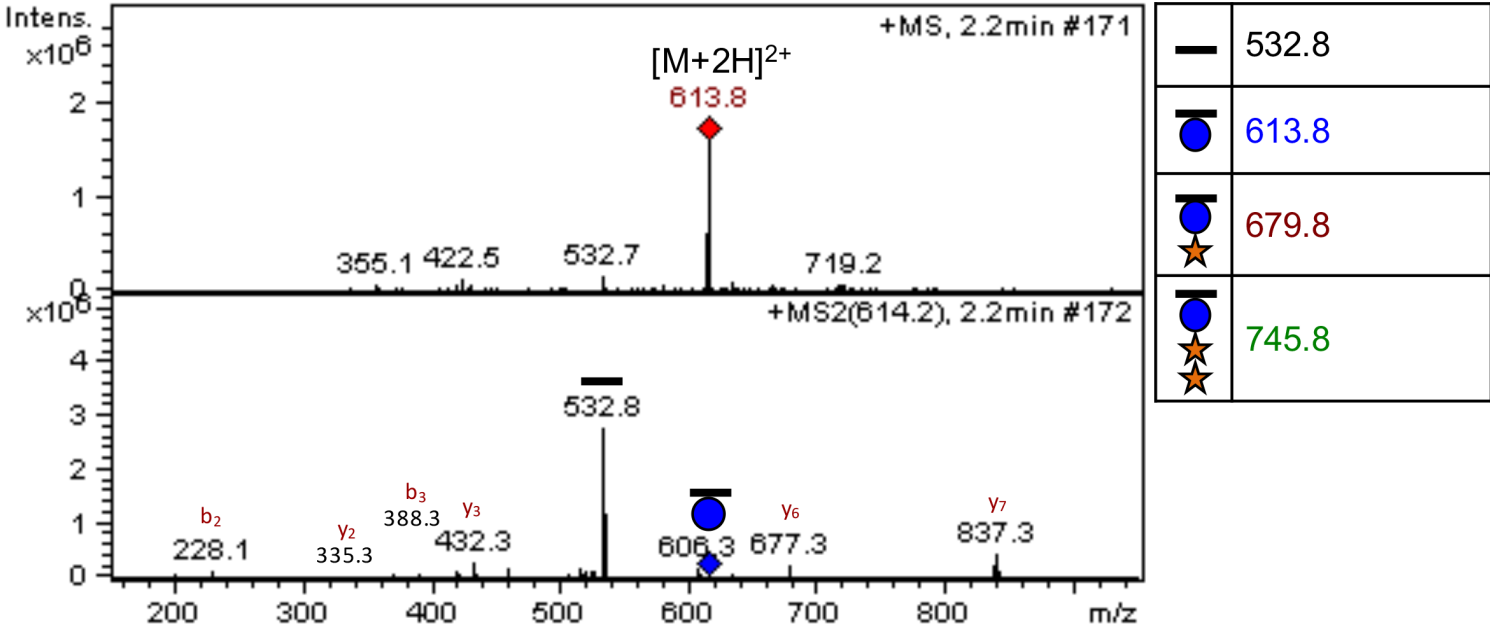

# Fig. S3, F

## EGF 4

<sup>181</sup>CASSPCRNGATCTALAGSSSF<sup>201</sup>

-Fringe

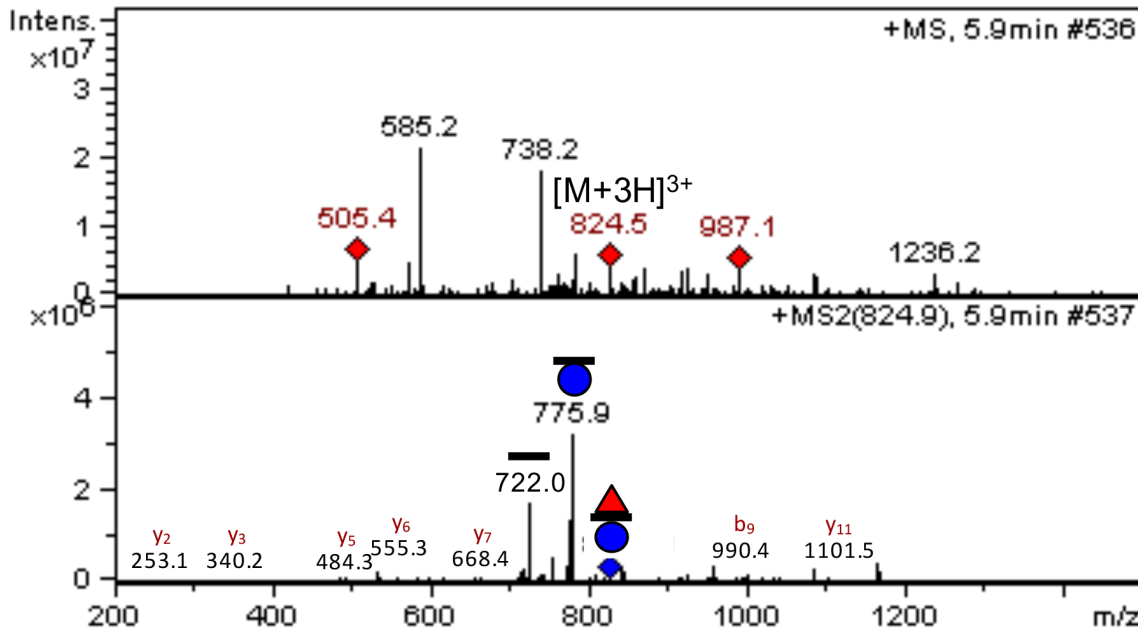

|   |   |                               |
|---|---|-------------------------------|
| — | ● | 1082.5;722.0;<br>1163.5;776.0 |
| ▲ | ▲ | 1155.5;770.7;<br>1236.5;824.7 |
| ■ | ■ | 1257.0;838.4;<br>1338.0;892.4 |

+Fringe

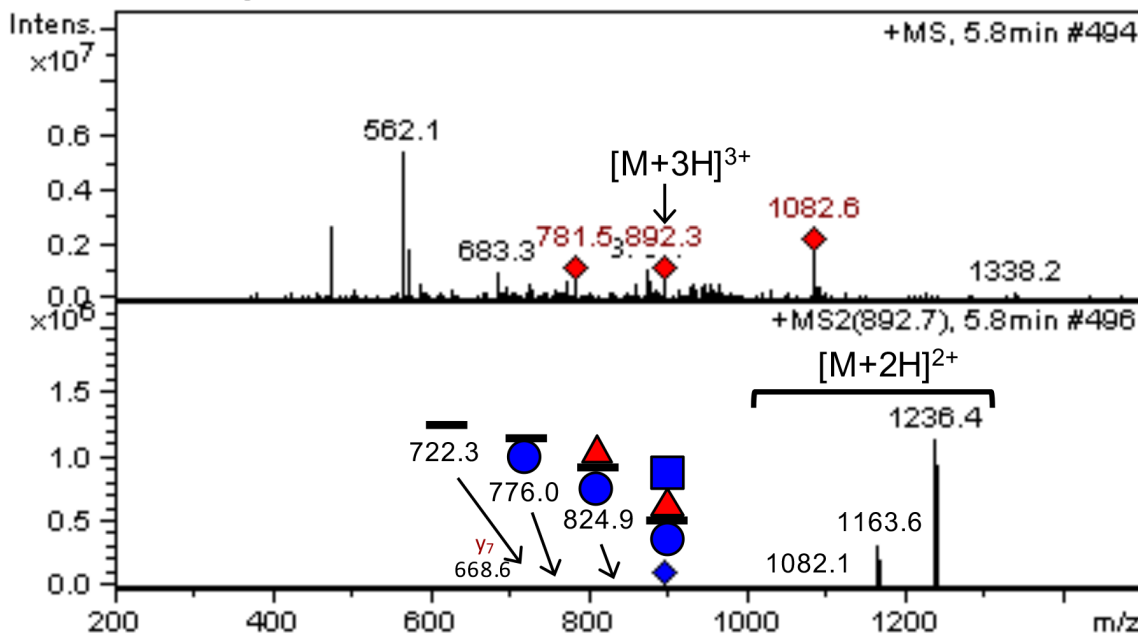

|   |   |                               |
|---|---|-------------------------------|
| — | ● | 1082.1;722.3<br>1163.1;776.3  |
| ▲ | ▲ | 1155.1;771.0<br>1236.1;825.0  |
| ■ | ■ | 1256.6;838.7;<br>1337.6;892.7 |

# Fig. S3, G

## EGF 4

<sup>202</sup>TCSCPPGFIGDTCSY<sup>216</sup>

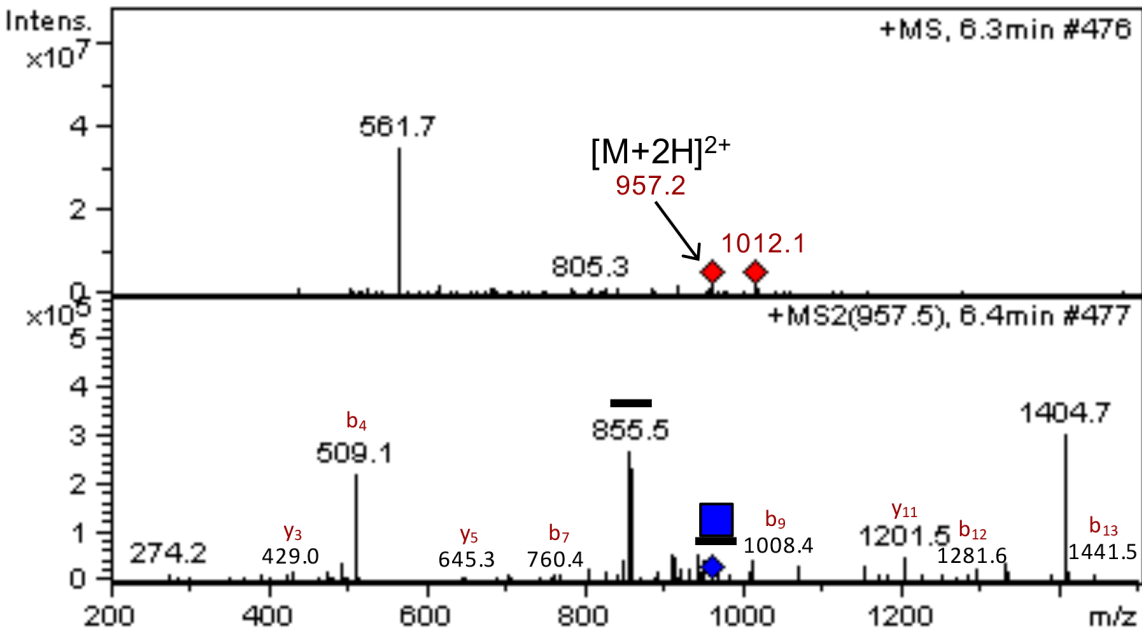

|   |       |
|---|-------|
| — | 855.5 |
| ■ | 957.0 |

# Fig. S3, H

## EGF 5

<sup>217</sup>DIEECQSNPCKY<sup>228</sup>

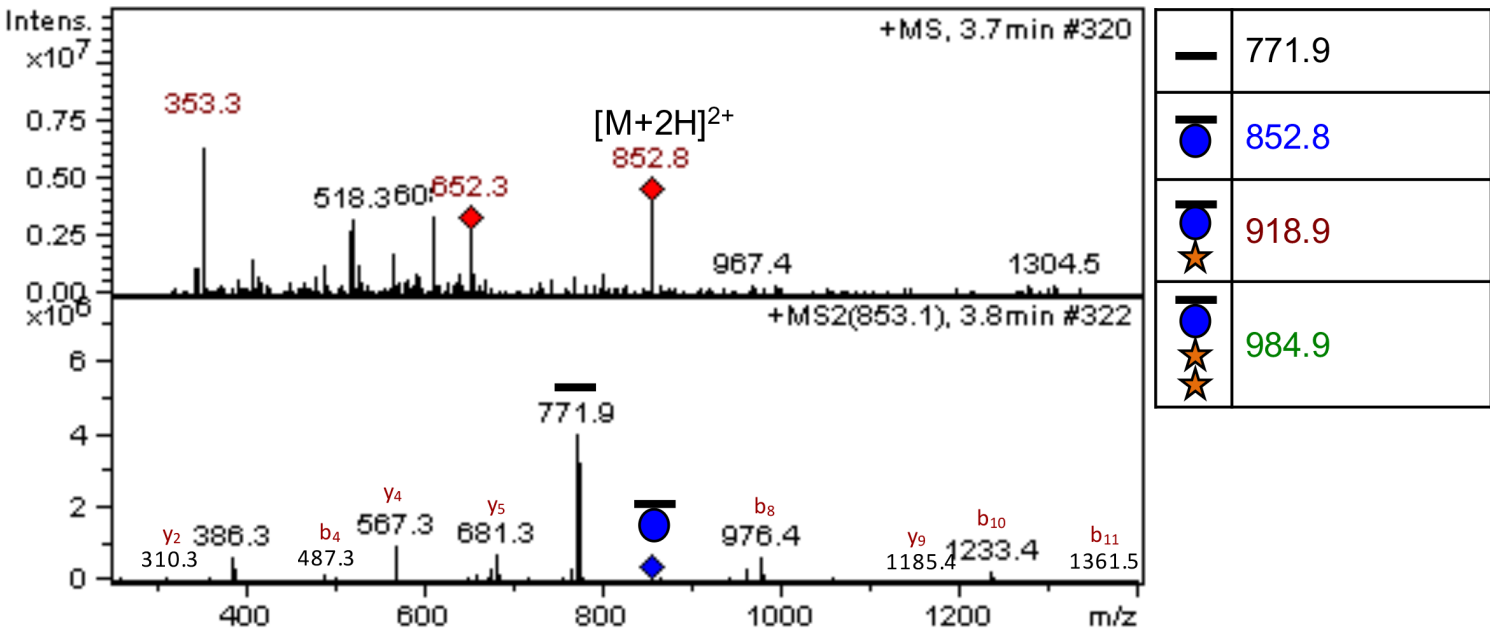

# Fig. S3, I

## EGF 5

<sup>229</sup>GGICVNTHGSY<sup>239</sup>

-Fringe

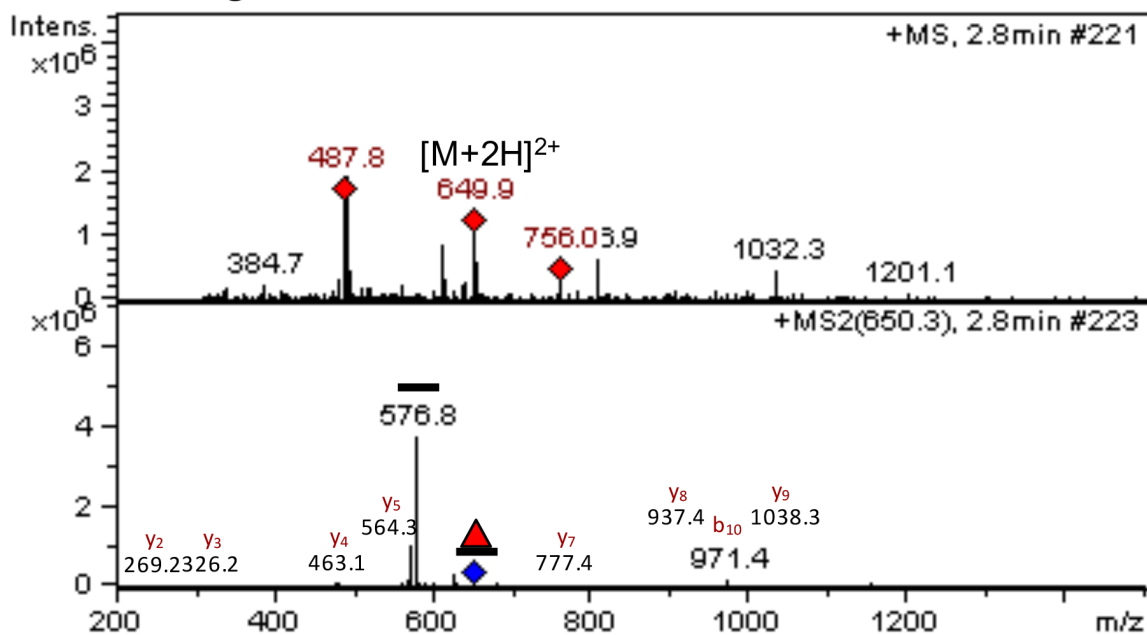

|   |               |
|---|---------------|
| — | 1152.5;576.8  |
| ▲ | 1298.56;649.8 |
| ■ | 1501.67;751.3 |

+Fringe

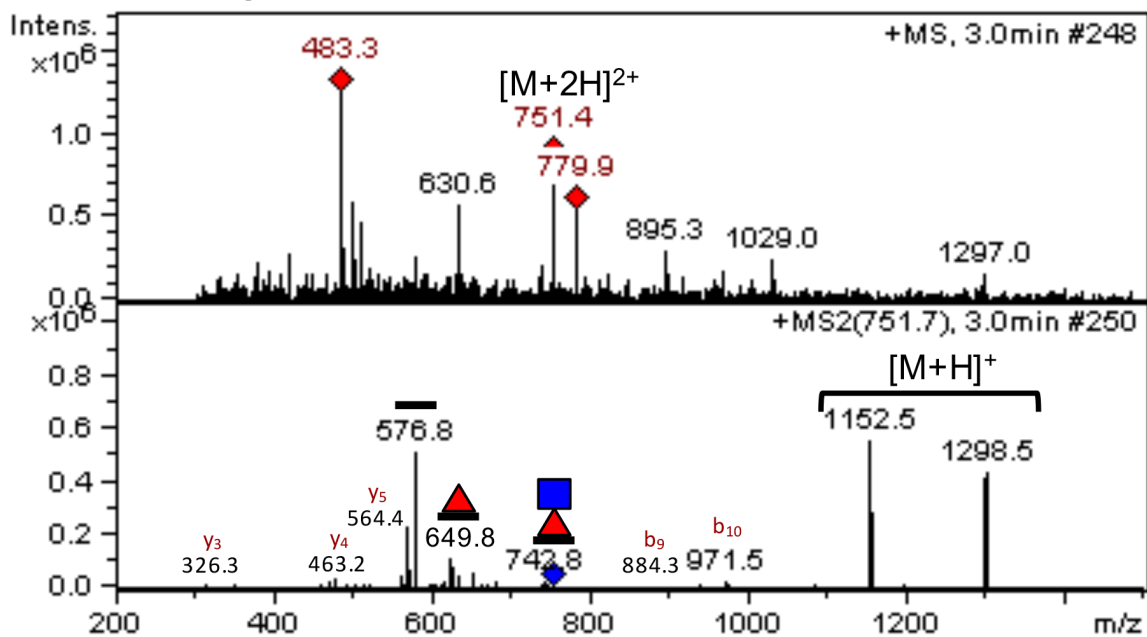

|   |               |
|---|---------------|
| — | 1152.5;576.8  |
| ▲ | 1298.56;649.8 |
| ■ | 1501.67;751.3 |



# Fig. S3, J

## EGF 5

<sup>228</sup>YGG**I**CVNTHGSYQCMCPTGY**T**GK<sup>250</sup>

-Fringe

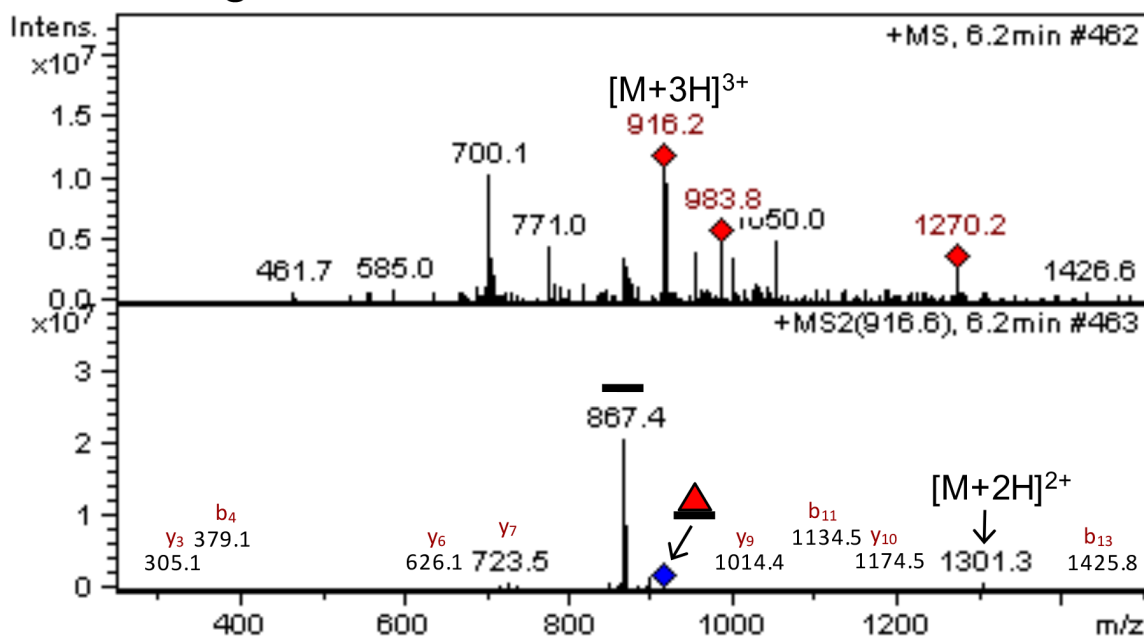

| For EICs |              |
|----------|--------------|
| —        | 867.4;1301.3 |
| ▲        | 916.1;1374.3 |
| ■        | 983.8;1475.8 |
| For MRM  |              |
| —        | 867.6→i787.6 |
| ▲        | 916.4→i867.6 |
| ■        | 984.1→i867.6 |

+Fringe

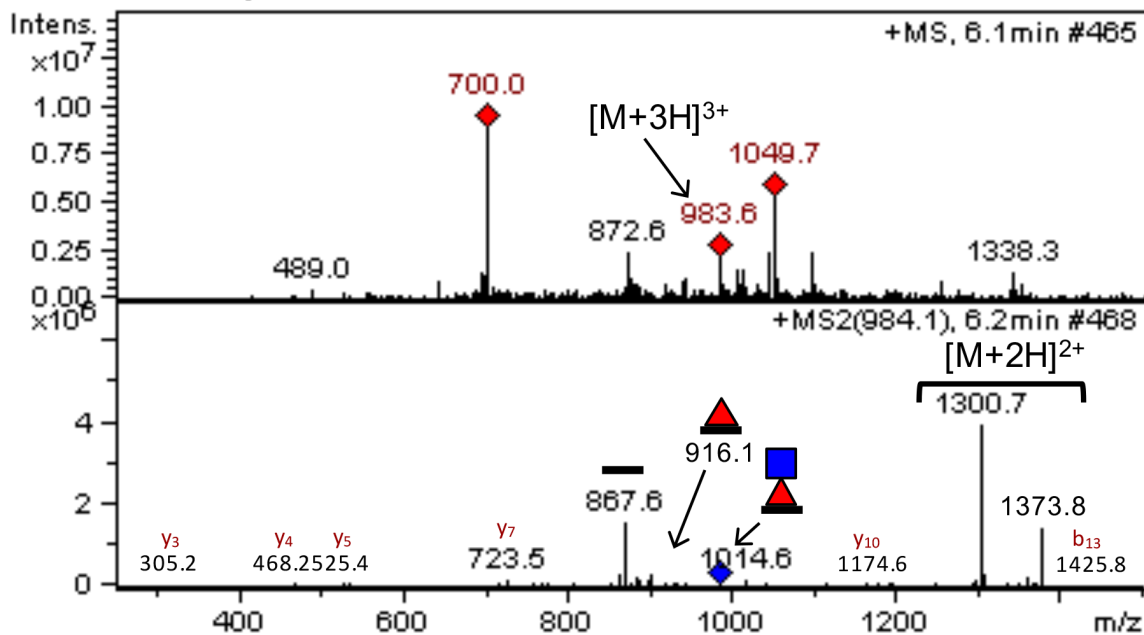

| For EICs |              |
|----------|--------------|
| —        | 867.6;1300.7 |
| ▲        | 1373.7;916.3 |
| ■        | 1475.2;984.0 |
| For MRM  |              |
| —        | 867.6→i787.6 |
| ▲        | 916.4→i867.6 |
| ■        | 984.1→i867.6 |

# Fig. S3, K

## EGF 5

<sup>248</sup>**I**GKDCDTKYKPCSPSPCQNGGICRSNGLSY<sup>277</sup>

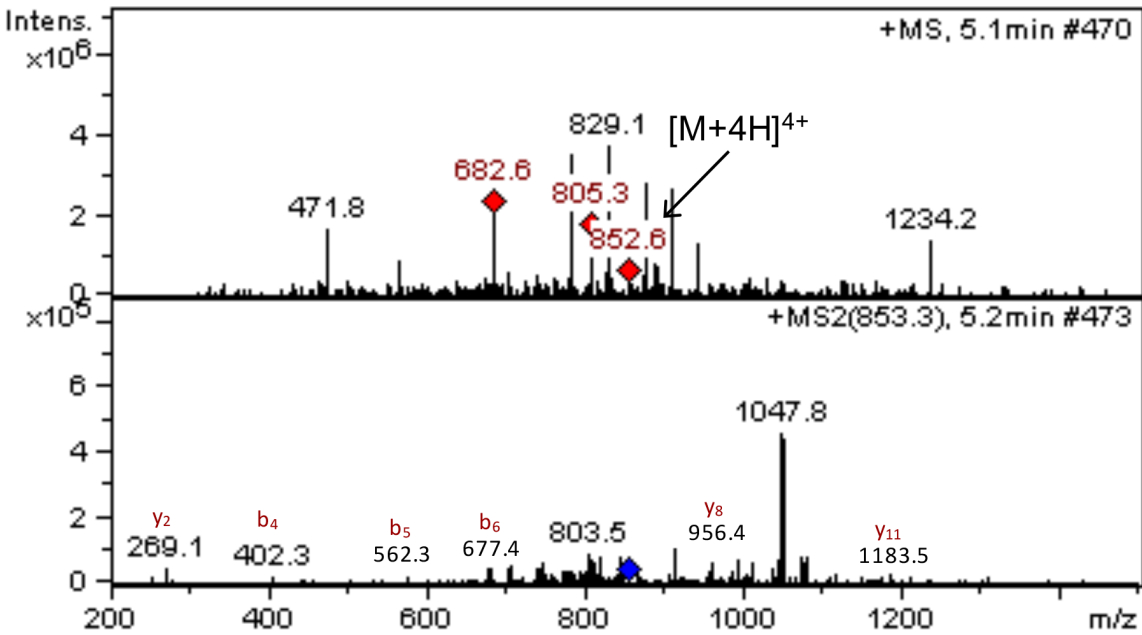

|   |       |
|---|-------|
| — | 853.3 |
| ■ | 904.0 |

# Fig. S3, L

## EGF 7

$^{289}\text{NCEQNYDDCLGHL CQNGG}\mathbf{I}\text{CIDGISDYTCR}^{318}$

-Fringe

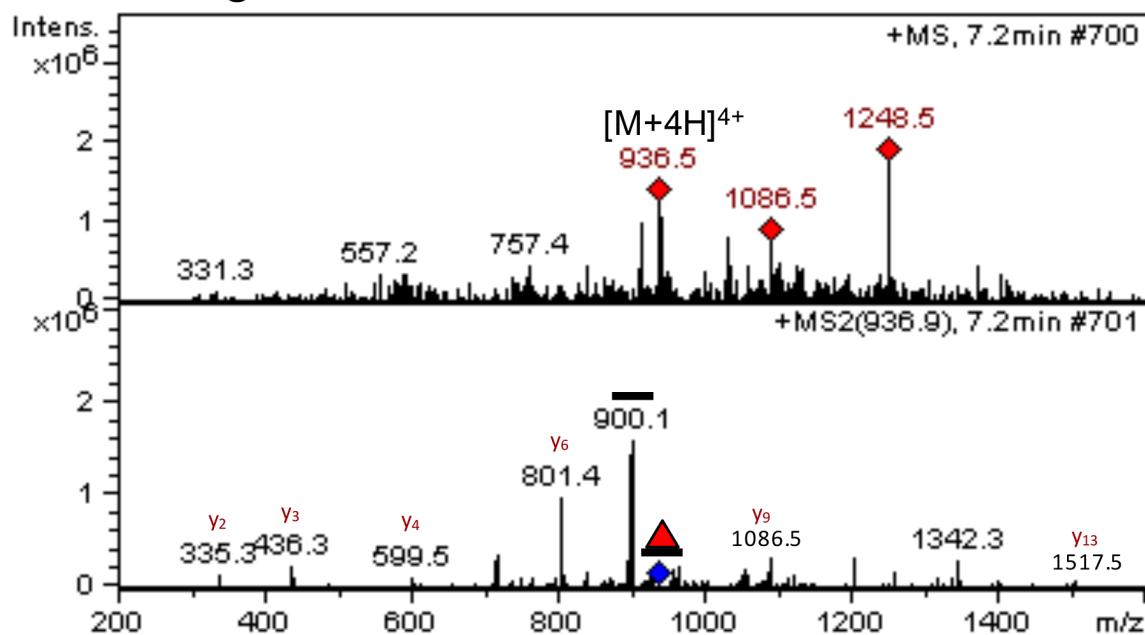

| For EICs |                |
|----------|----------------|
| —        | 1199.8;900.1   |
| ▲        | 1248.5;936.6   |
| ■        | 1316.2;987.3   |
| For MRM  |                |
| —        | 1199.9→i1313.7 |
| ▲        | 1248.4→i1199.9 |
| ■        | 1316.4→i1199.9 |

+Fringe

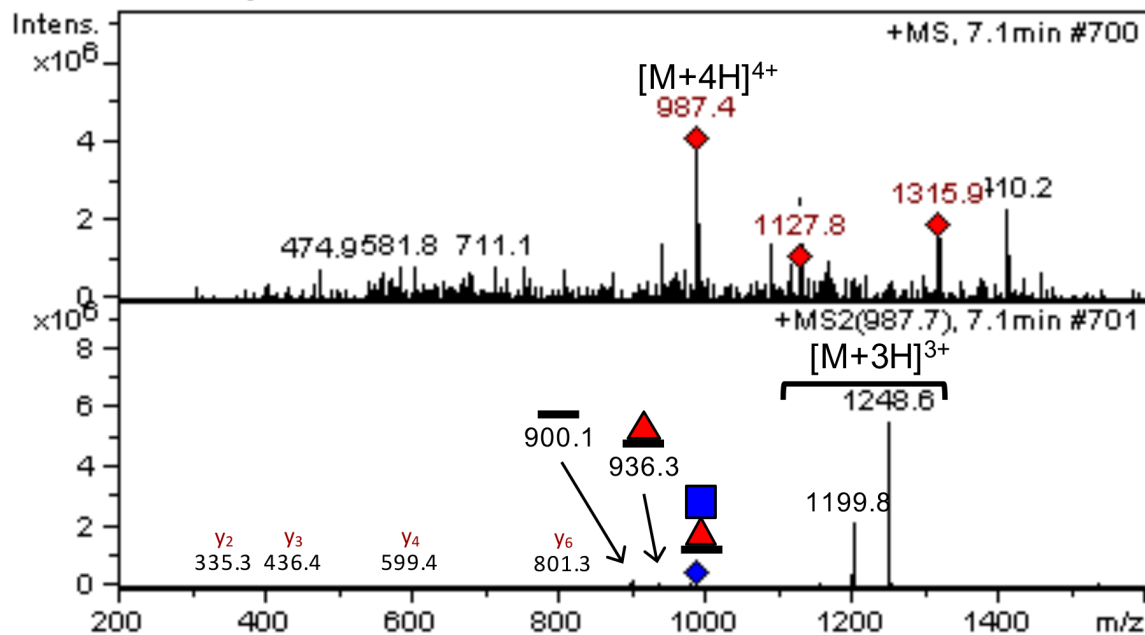

| For EICs |                |
|----------|----------------|
| —        | 1199.8;900.1   |
| ▲        | 1248.5;936.6   |
| ■        | 1316.2;987.3   |
| For MRM  |                |
| —        | 1199.9→i1313.7 |
| ▲        | 1248.4→i1199.9 |
| ■        | 1316.4→i1199.9 |

# Fig. S3, M

## EGF 8

$^{328}\text{CQDDVDECAQRDHPVCQNGA}\mathbf{I}\text{CTNTHGSY}^{356}$

-Fringe

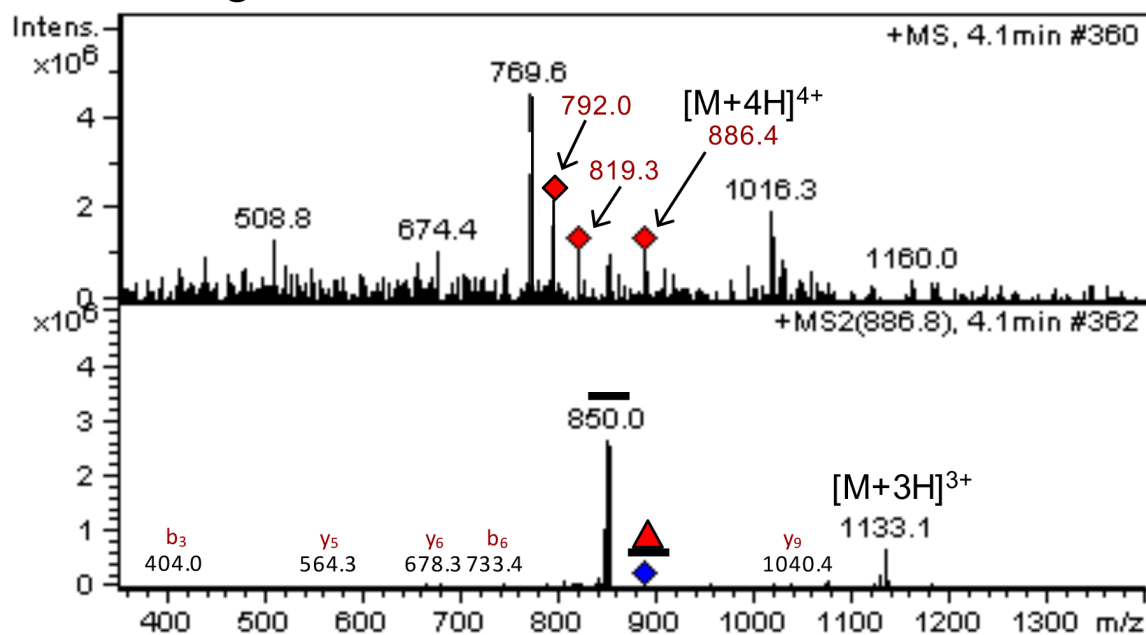

| For EICs |                |
|----------|----------------|
| —        | 1133.1;850.0   |
| ▲        | 1181.8;886.5   |
| ■        | 1249.5;937.2   |
| For MRM  |                |
| —        | 1133.0→i1534.7 |
| ▲        | 1181.8→i1133.0 |
| ■        | 1250.5→i1133.0 |

+Fringe

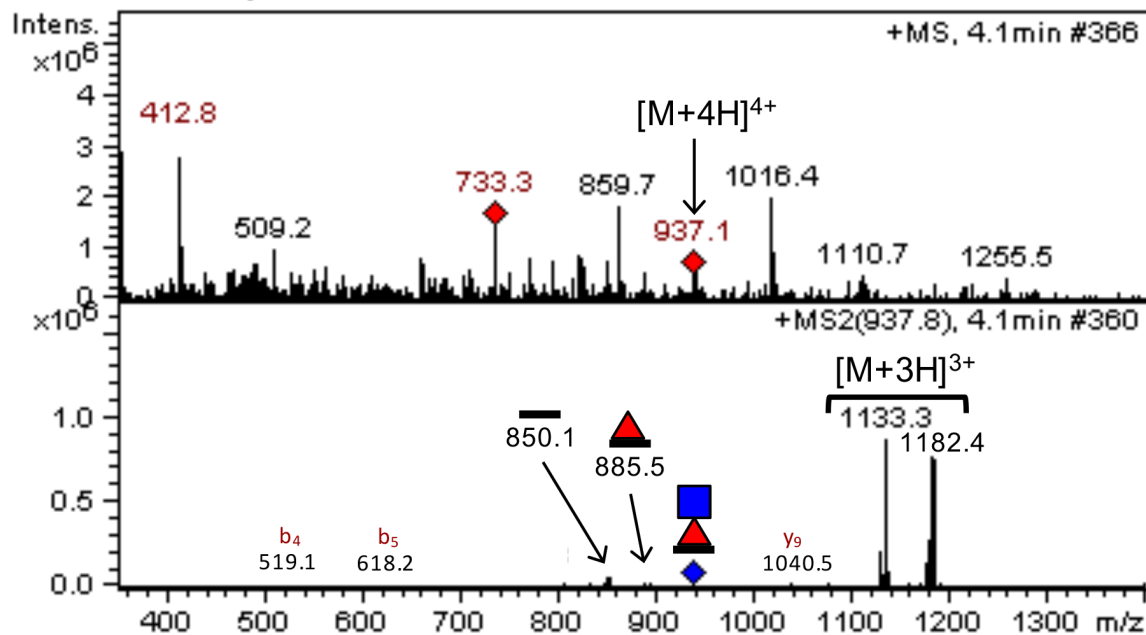

| For EICs |                |
|----------|----------------|
| —        | 1133.3;850.1   |
| ▲        | 1182.0;886.6   |
| ■        | 1249.7;937.3   |
| For MRM  |                |
| —        | 1133.0→i1534.7 |
| ▲        | 1181.8→i1133.0 |
| ■        | 1250.5→i1133.0 |

# Fig. S3, N

## EGF 9

<sup>378</sup>QAACFYGA**I**CIDGVGSFYCQCTK<sup>400</sup>

-Fringe

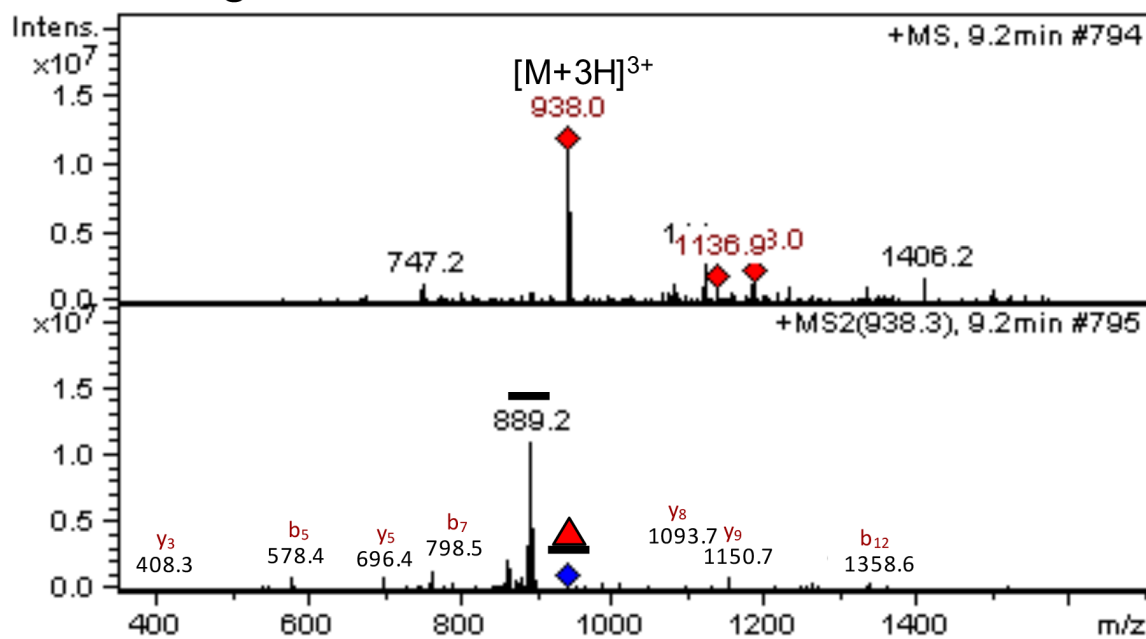

| For EICs |                |
|----------|----------------|
| —        | 889.2;1333.4   |
| ▲        | 937.9;1406.4   |
| ■        | 1005.6;1507.9  |
| ▲        | 1005.6;1507.9  |
| For MRM  |                |
| —        | 1333.3→i1307.0 |
| ▲        | 1406.7→i1333.3 |
| ■        | 1508.2→i1333.3 |
| ▲        | 1508.2→i1333.3 |

+Fringe

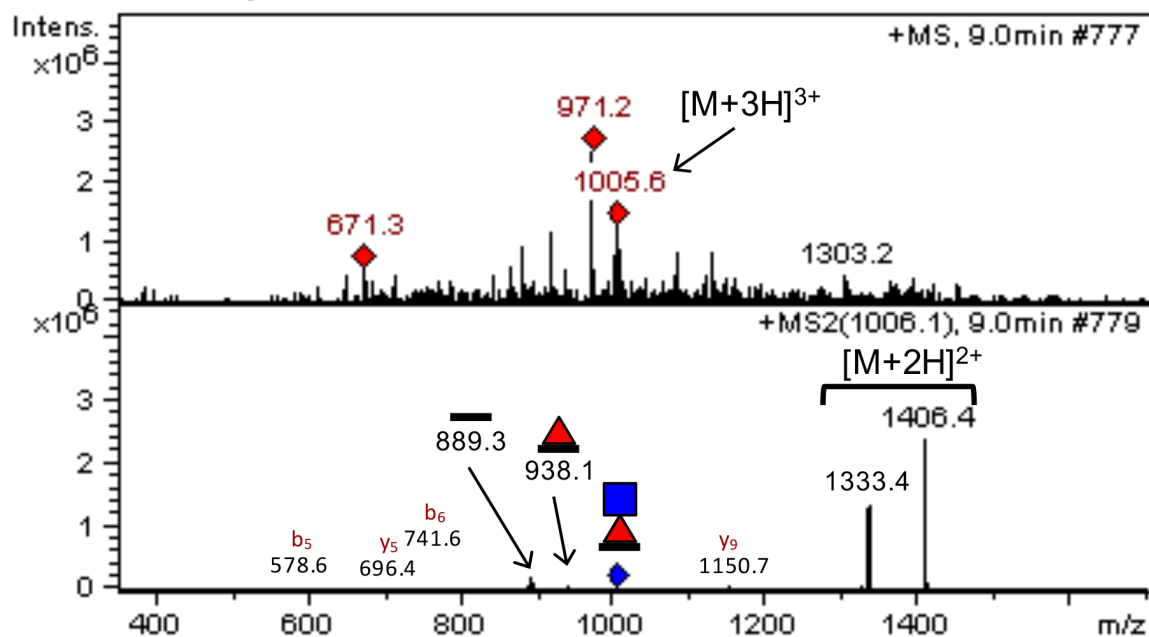

| For EICs |                |
|----------|----------------|
| —        | 889.3;1333.4   |
| ▲        | 938.0;1406.4   |
| ■        | 1005.7;1507.9  |
| ▲        | 1005.7;1507.9  |
| For MRM  |                |
| —        | 1333.3→i1307.0 |
| ▲        | 1406.7→i1333.3 |
| ■        | 1508.2→i1333.3 |
| ▲        | 1508.2→i1333.3 |

# Fig. S3, O

## EGF 9

<sup>396</sup>CQCTKGKTGLL<sup>406</sup>

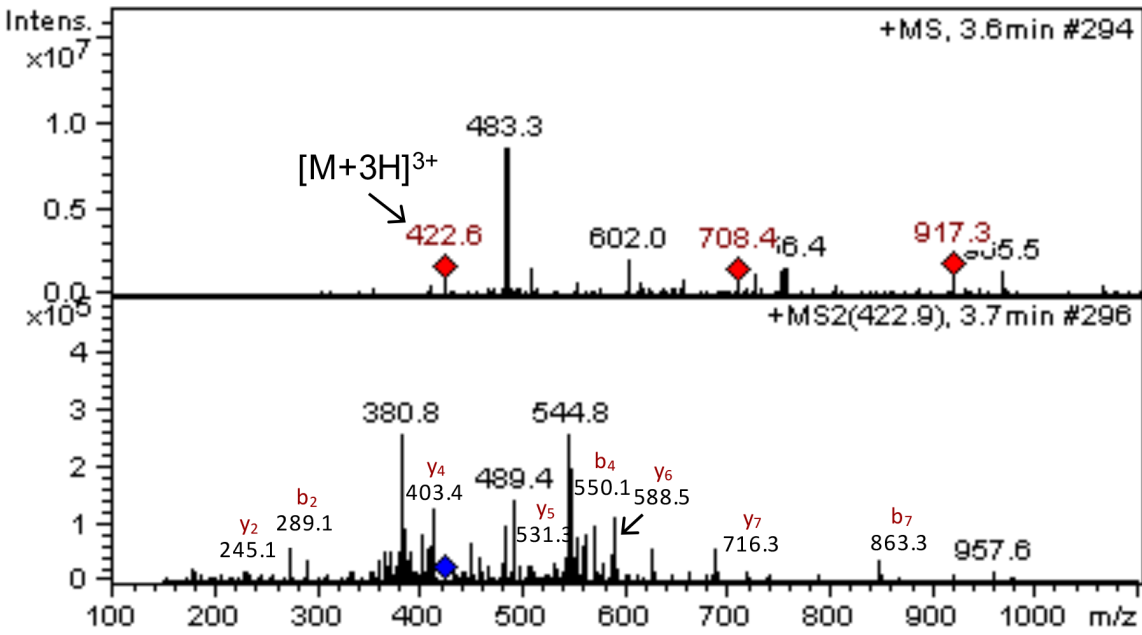

|   |       |
|---|-------|
| — | 422.9 |
| ■ | 490.6 |

# Fig. S3, P

## EGF 9 and EGF 10

<sup>403</sup>TGLLCHLDDACTSNPCHADAICDTSPINGSYACSCATGYK<sup>442</sup>

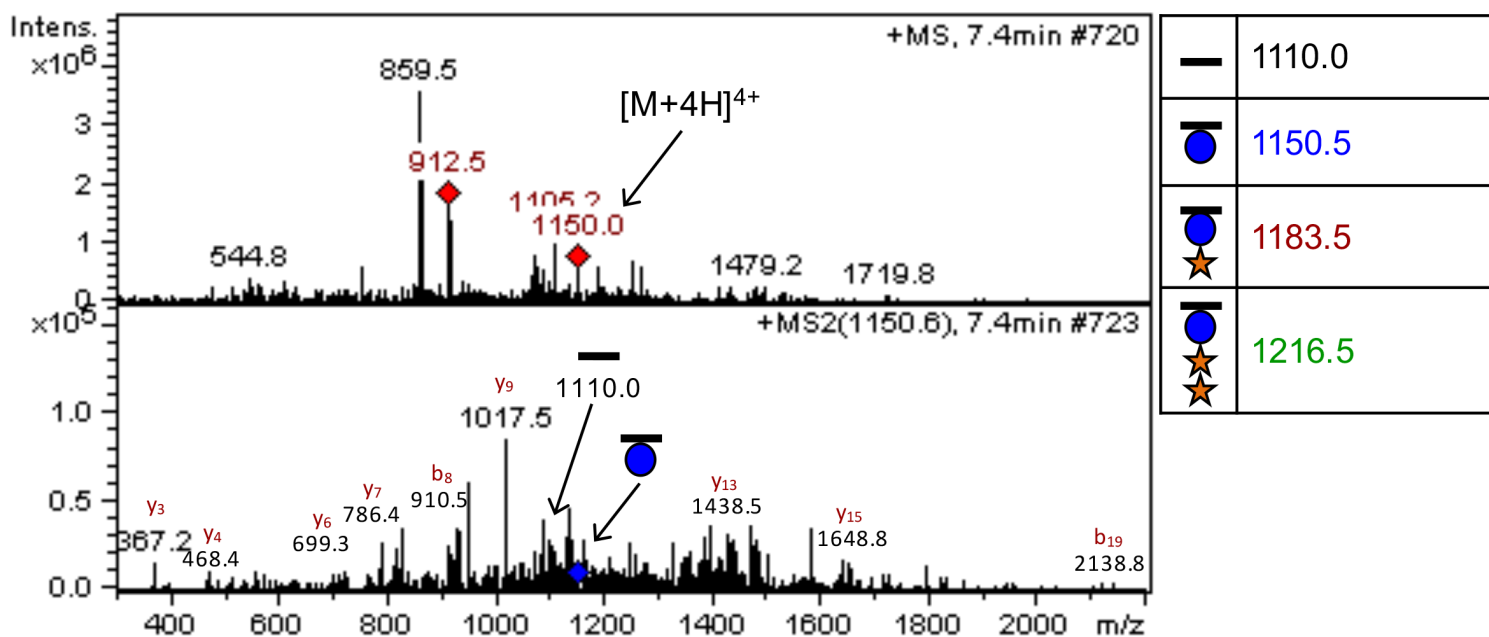

# Fig. S3, Q

## EGF 11

<sup>474</sup>CNCSQGFTGPR<sup>484</sup>

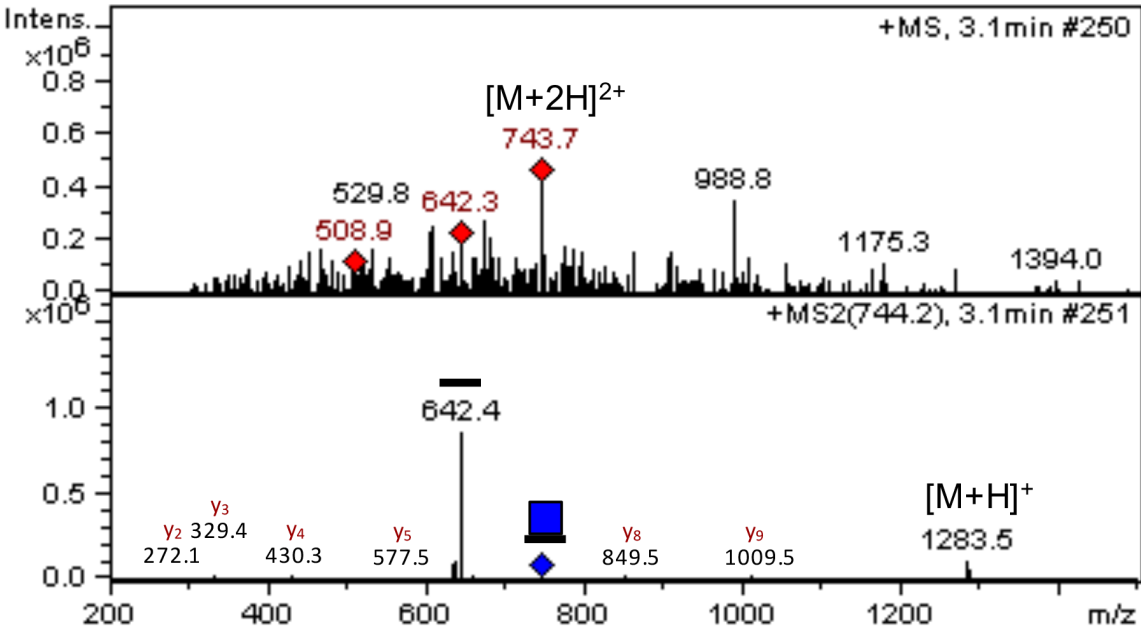

|   |              |
|---|--------------|
| — | 642.4;1283.5 |
| ■ | 743.9;1486.5 |



# Fig. S3, R

## EGF 12

<sup>485</sup>CETNINECESHPCQNEGSCLDDPGTFR<sup>511</sup>

-Fringe

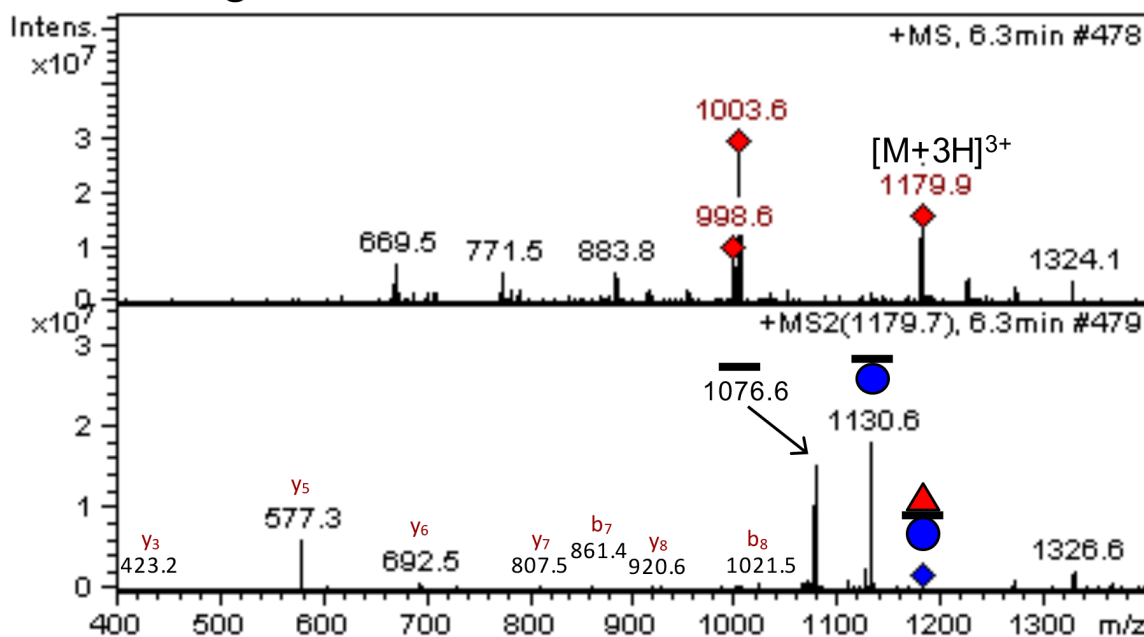

|   |   |                               |
|---|---|-------------------------------|
| — | ● | 1076.6;807.7;<br>1130.6;848.2 |
| ▲ | ▲ | 1125.3;844.2;<br>1179.3;884.7 |
| ■ | ■ | 1193.0;894.9;<br>1247.0;935.4 |
| — | ▲ | 1076.6;807.7;<br>1125.3;844.2 |
| ● | ● | 1130.6;848.2<br>1179.3;884.2  |
| ● | ▲ | 1174.6;881.2<br>1223.3;917.7  |
| ● | ▲ | 1218.6;914.2;<br>1267.3;950.7 |

+Fringe

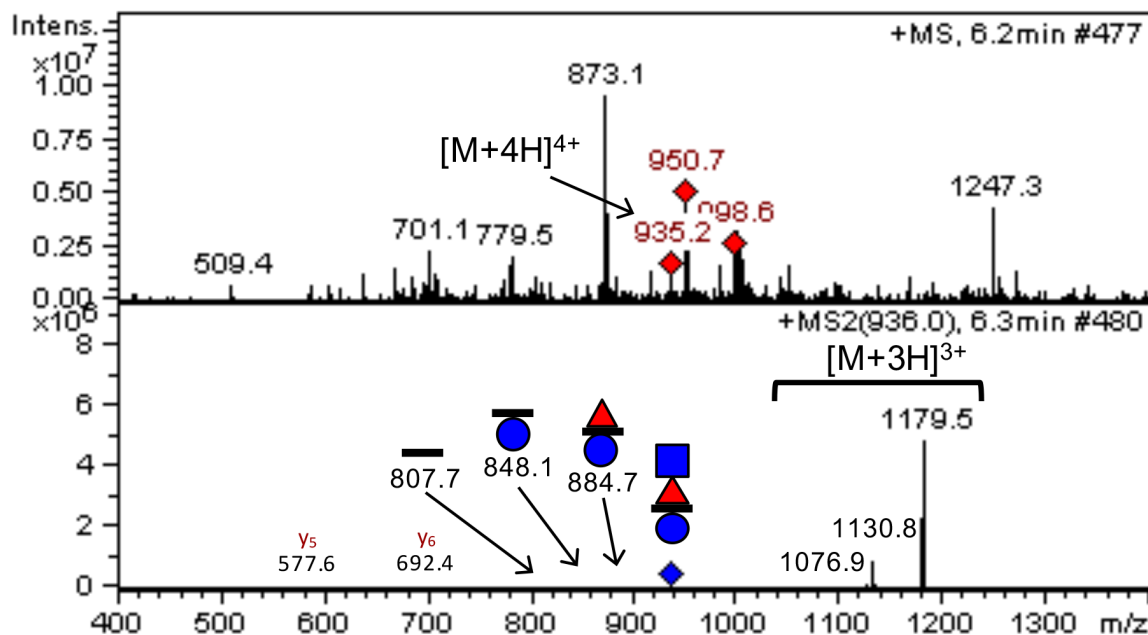

|   |   |                               |
|---|---|-------------------------------|
| — | ● | 1076.9;807.7;<br>1130.9;848.2 |
| ▲ | ▲ | 1125.6;844.2<br>1179.6;884.7  |
| ■ | ■ | 1193.3;894.9;<br>1247.3;935.4 |

# Fig. S3, S

## EGF 12

<sup>501</sup>GSCLDDPGTFRVCMPGFTGTQCE<sup>524</sup>

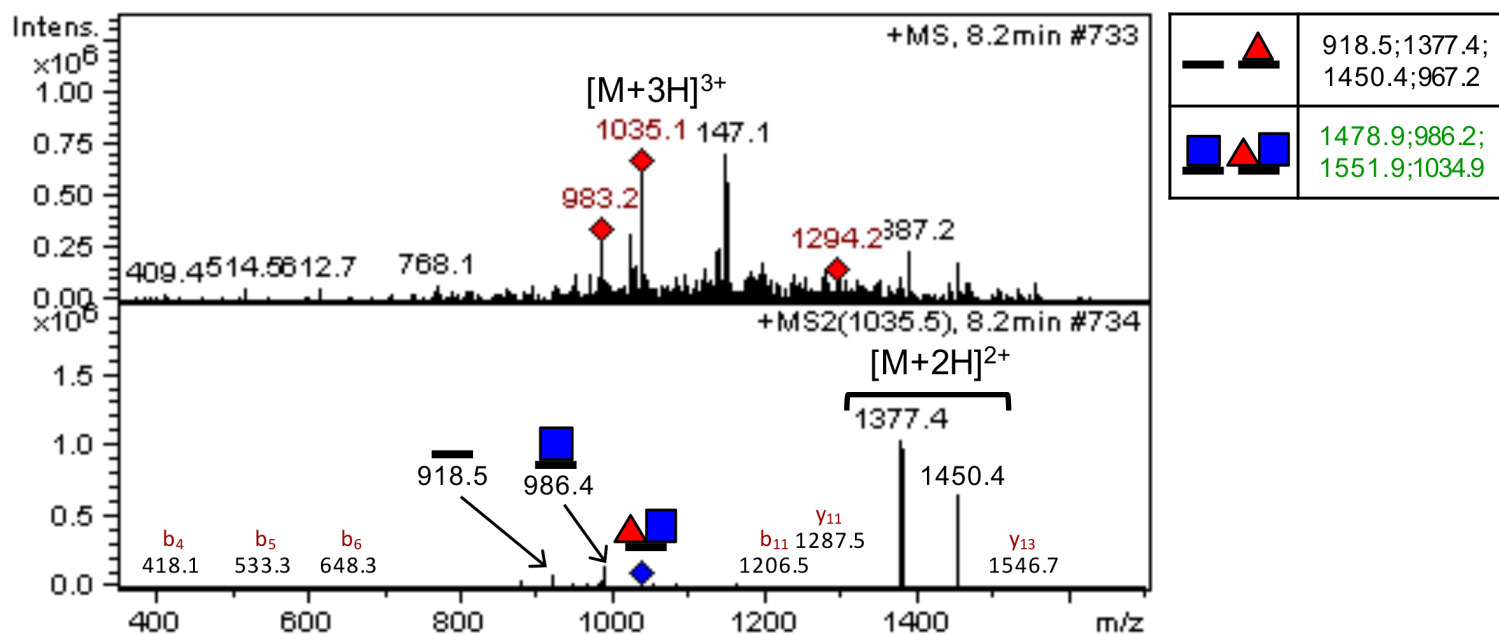

# Fig. S3, T

## EGF 12 and EGF 13

<sup>512</sup>CVCMPGFTGTQCEIDIDECQSNPCLNDGTCHDK<sup>544</sup>

-Fringe

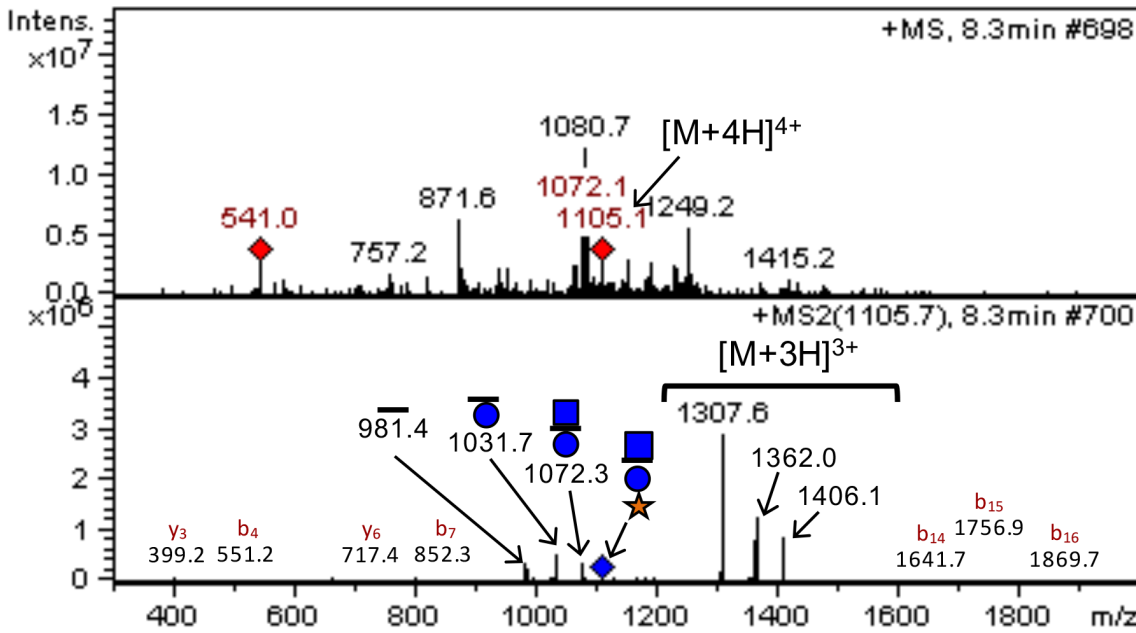

|  |                                                   |
|--|---------------------------------------------------|
|  | 1307.6;981.4;<br>1429.3;1072.6;<br>1473.3;1105.6  |
|  | 1356.3;1017.9;<br>1478.0;1109.1;<br>1522.0;1142.1 |
|  | 1424.0;1068.6;<br>1545.7;1159.8;<br>1589.7;1192.8 |

|  |                                 |
|--|---------------------------------|
|  | 1307.6;981.4;<br>1375.3;1032.1  |
|  | 1361.6;1021.9;<br>1429.3;1072.6 |
|  | 1405.6;1054.9;<br>1473.3;1105.6 |
|  | 1449.6;1087.9;<br>1517.3;1138.6 |

+Fringe

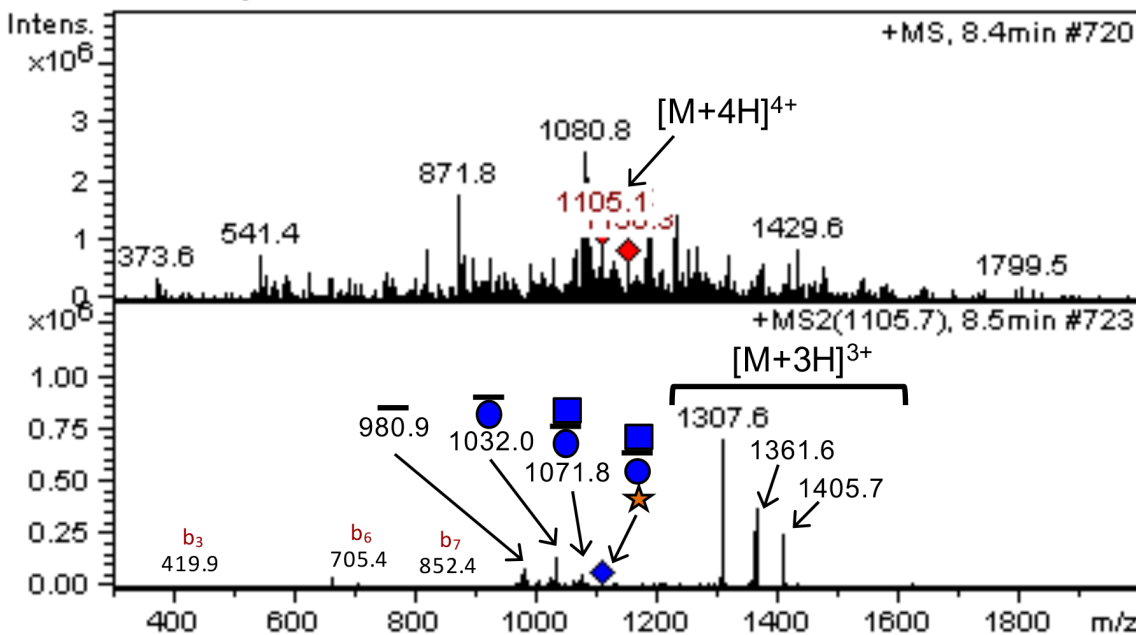

|  |                                                   |
|--|---------------------------------------------------|
|  | 1307.6;980.9;<br>1429.3;1072.1;<br>1473.3;1105.1  |
|  | 1356.3;1017.4;<br>1478.0;1108.6;<br>1522.0;1141.6 |
|  | 1424.0;1068.1;<br>1545.7;1159.3;<br>1589.7;1192.3 |

# Fig. S3, U

## EGF 13

<sup>550</sup>CSCALGFTGAR<sup>560</sup>

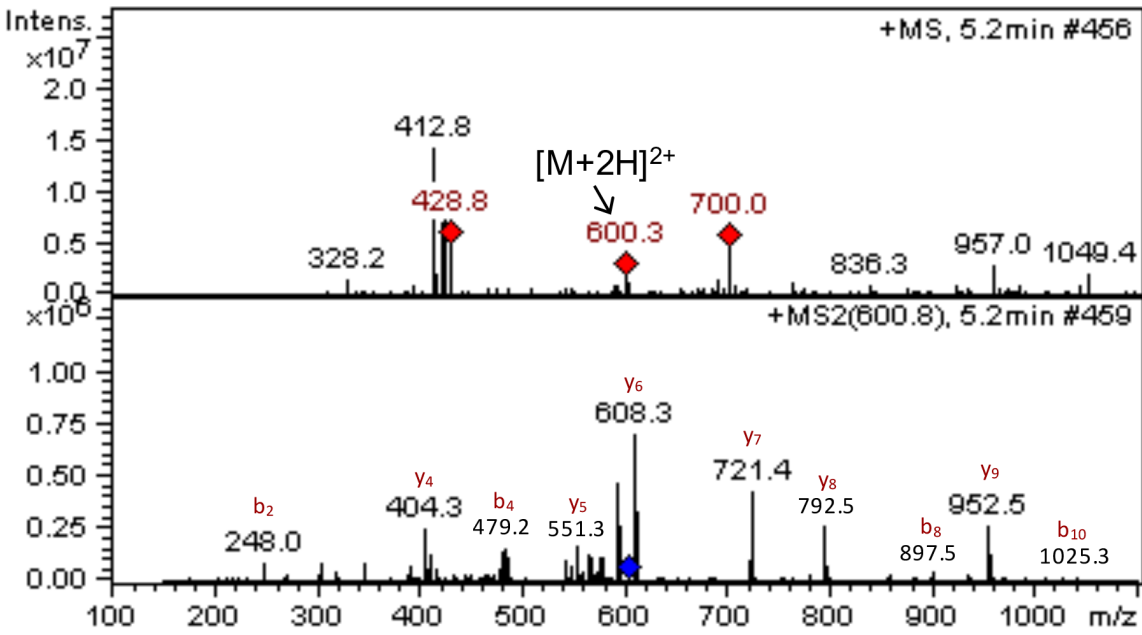

|  |       |
|--|-------|
|  | 600.8 |
|  | 702.3 |

# Fig. S3, V

## EGF 13 and EGF 14

<sup>557</sup>TGARCQINIDDCQSQPCRNRGICHDSIAGY<sup>586</sup>

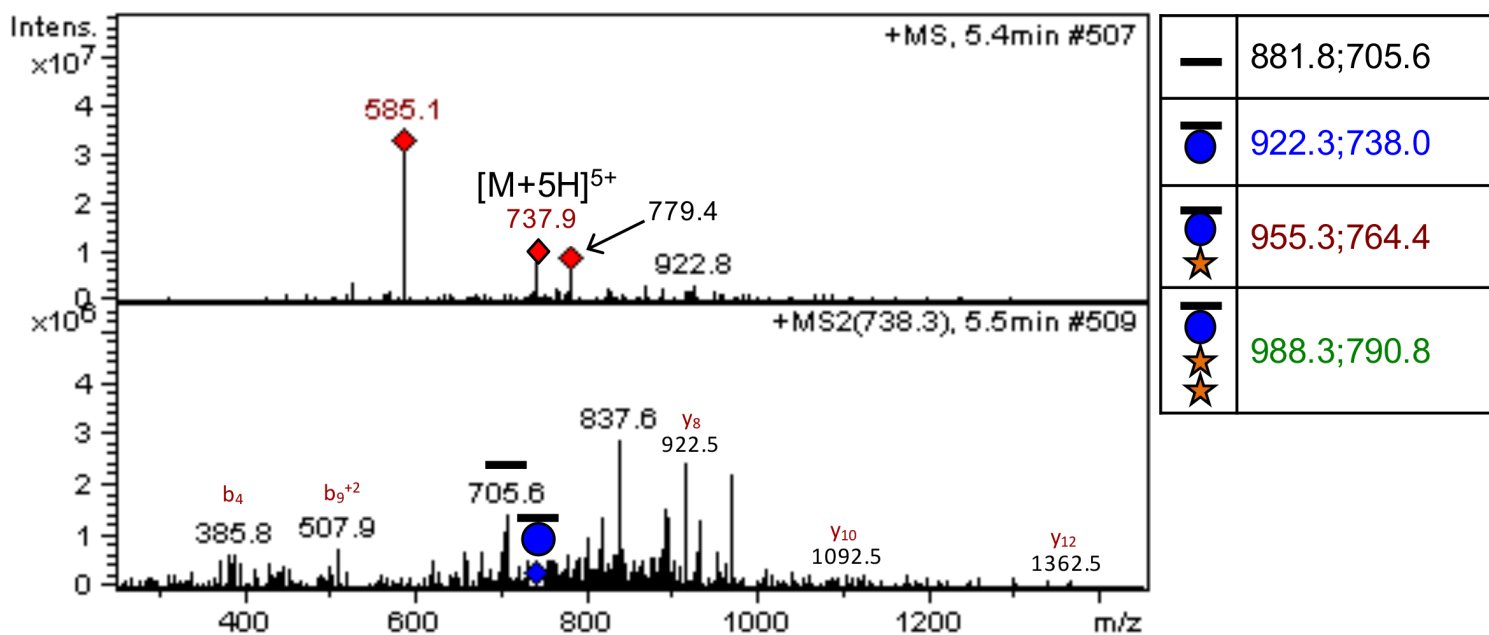

# Fig. S3, W

## EGF 14 and 15

<sup>577</sup>GICHDSIAGYSCECPPGYTGTSCEININDCDSNPCHR<sup>613</sup>

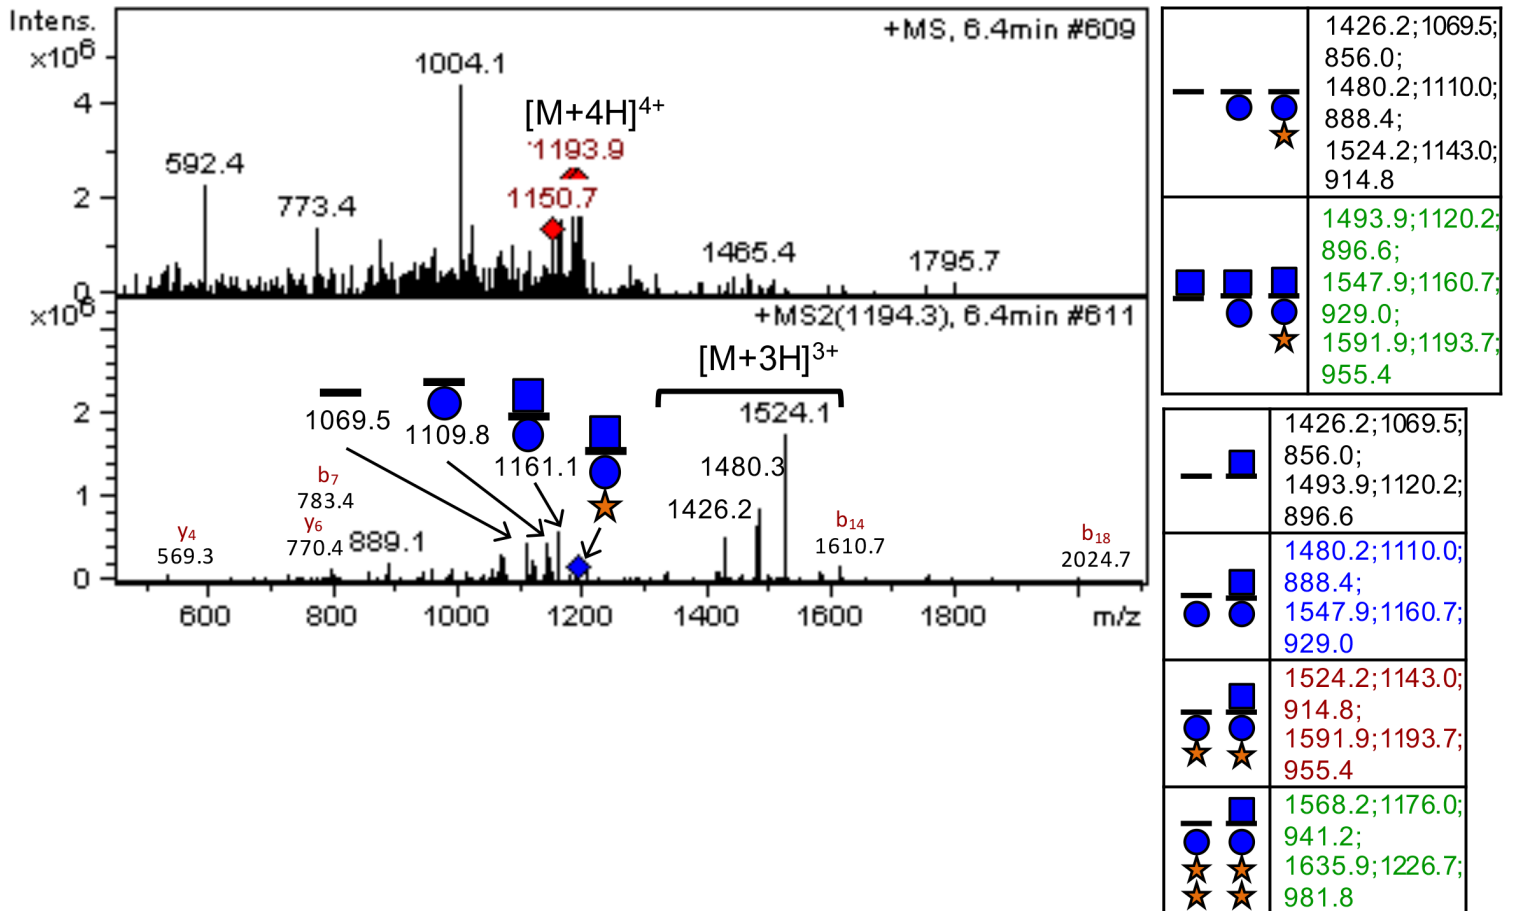

# Fig. S3, X

## EGF 15

$^{625}\text{CLCDPGY}\text{TGYICQK}^{638}$

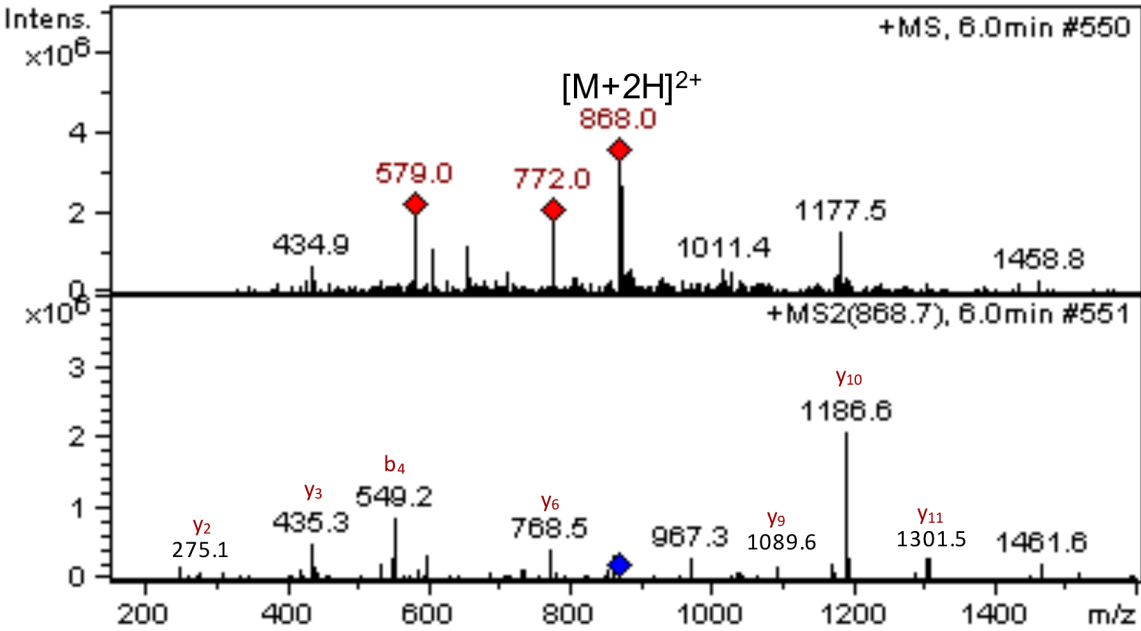

|   |             |
|---|-------------|
| — | 868.7;579.5 |
| ■ | 970.2;647.2 |

# Fig. S3, Y

## EGF 16

$^{635}\text{I}CQKQINECE\text{S}NPCQF^{650}$

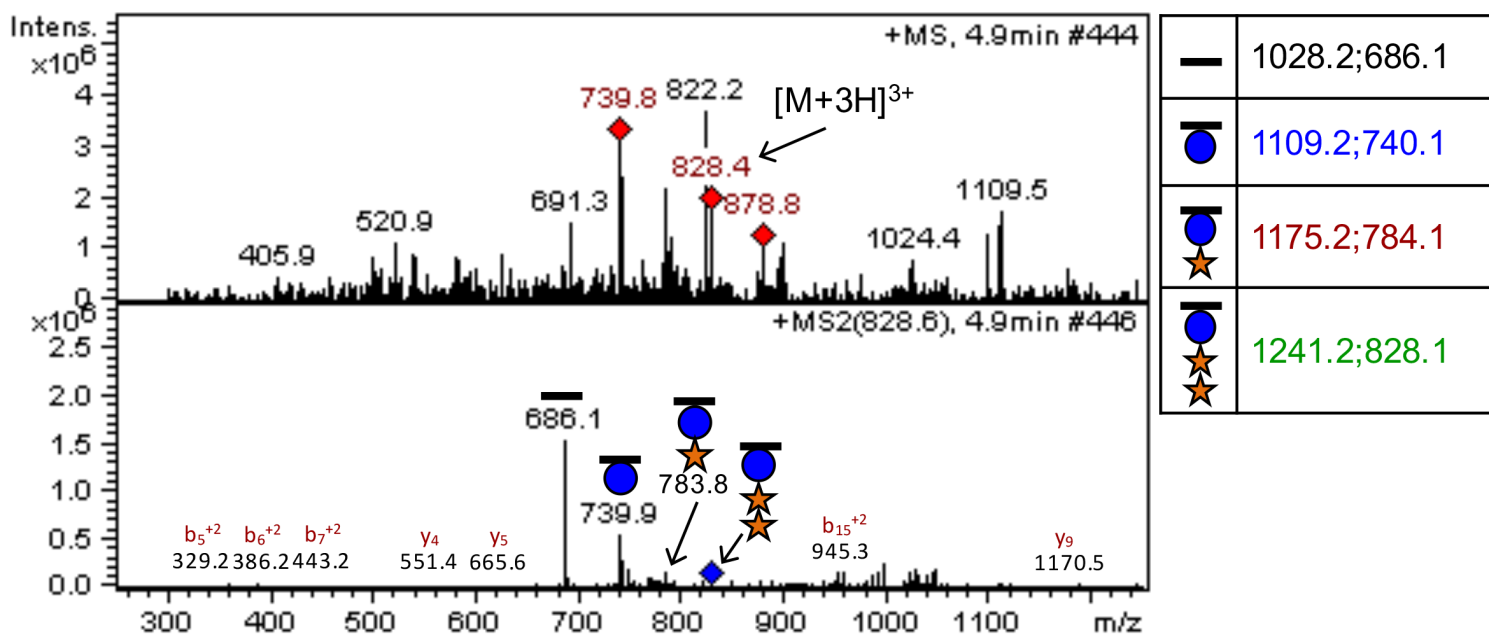



# Fig. S3, Z

## EGF 16

$^{658}\text{VGSYYCQCQAGTSGK}^{672}$

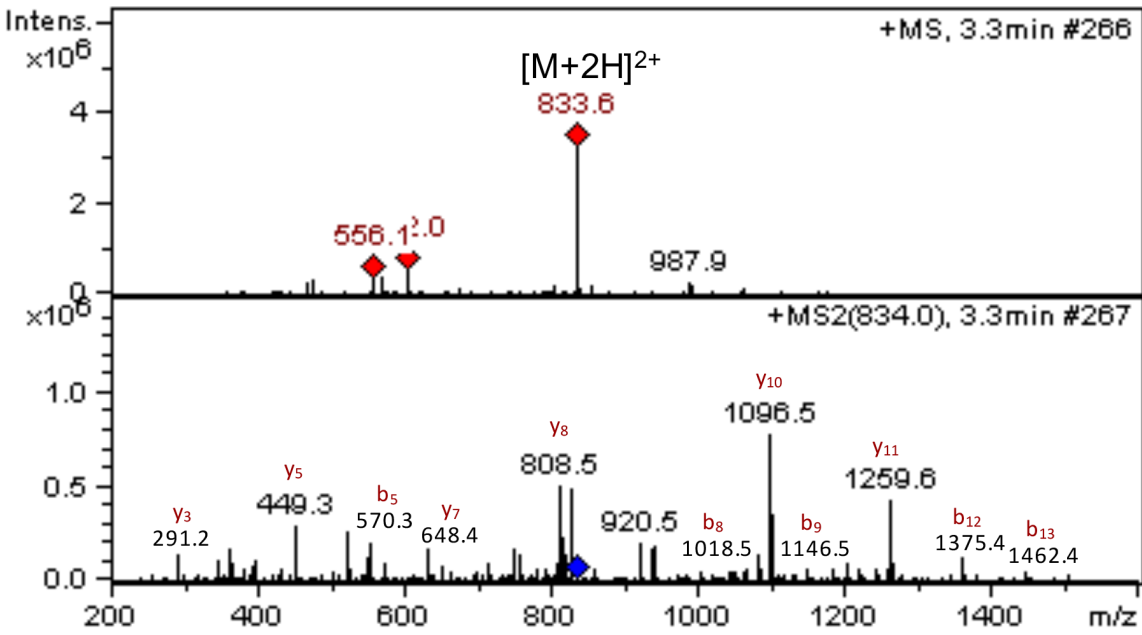

|   |             |
|---|-------------|
| — | 834.0;556.3 |
| ■ | 935.5;624.0 |

# Fig. S3, A'

## EGF 17

$^{673}\text{NCEVNVNECH}$ S $\text{NPCNNGA}$ I $\text{CIDGINSYK}^{700}$

-Fringe

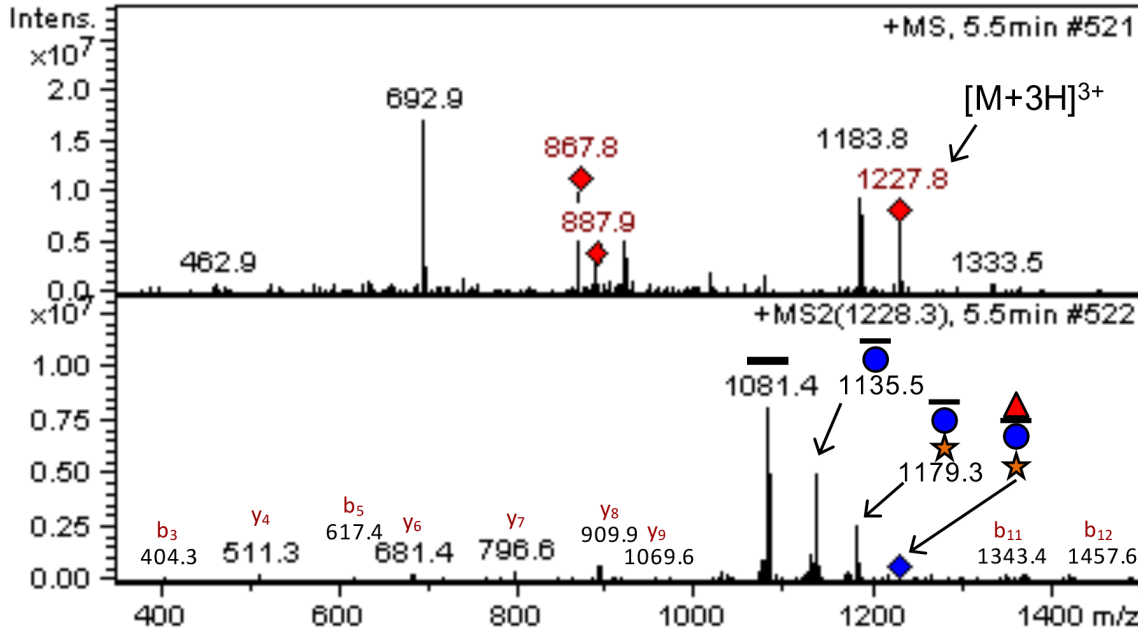

|  |                                                |
|--|------------------------------------------------|
|  | 1081.4;811.5;<br>1135.4;852.0;<br>885.0        |
|  | 1130.1;848.0;<br>1184.1;888.5;<br>1228.1;921.5 |
|  | 1197.8;898.7;<br>1251.8;939.2<br>1295.8;972.2  |
|  | 1081.4;811.5;<br>1130.1;848.0                  |
|  | 1135.4;852.0;<br>1184.1;888.5                  |
|  | 885.0;1228.1;<br>921.5                         |
|  | 1223.4;918.0;<br>1272.1;954.5                  |

+Fringe

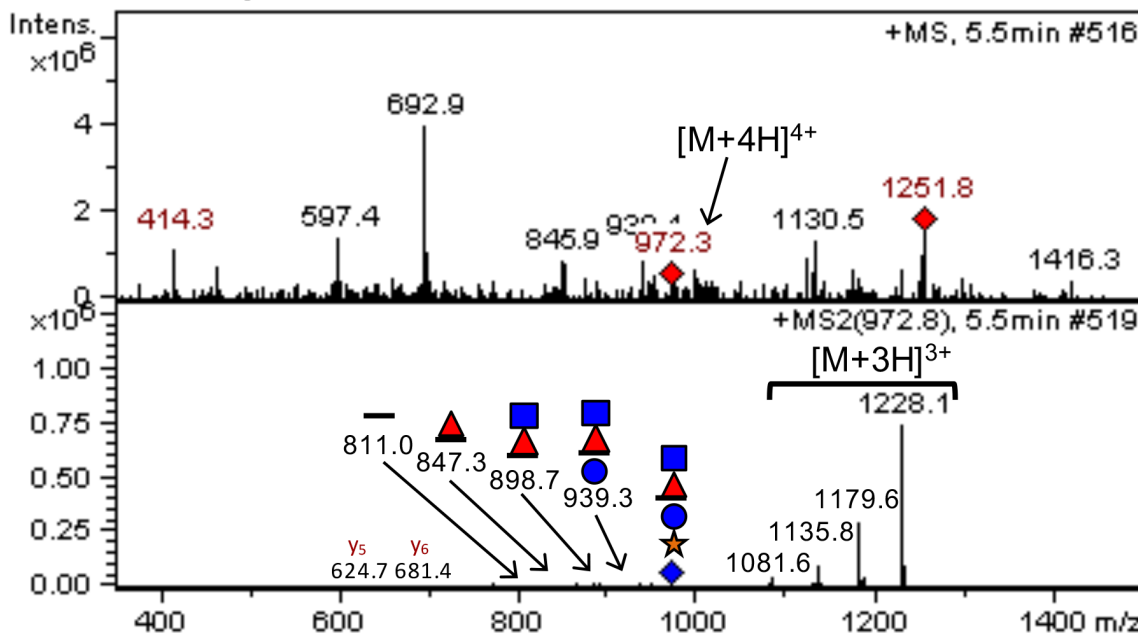

|  |                                                |
|--|------------------------------------------------|
|  | 1081.6;811.0;<br>1135.6;851.5;<br>884.5        |
|  | 1130.3;847.5;<br>1184.3;888.0;<br>1228.3;921.0 |
|  | 1198.0;898.2<br>1252.0;938.7;<br>1296.0;971.7  |

# Fig. S3, B'

## EGF 17

<sup>701</sup>CQCVPGFTGQHCEK<sup>714</sup>

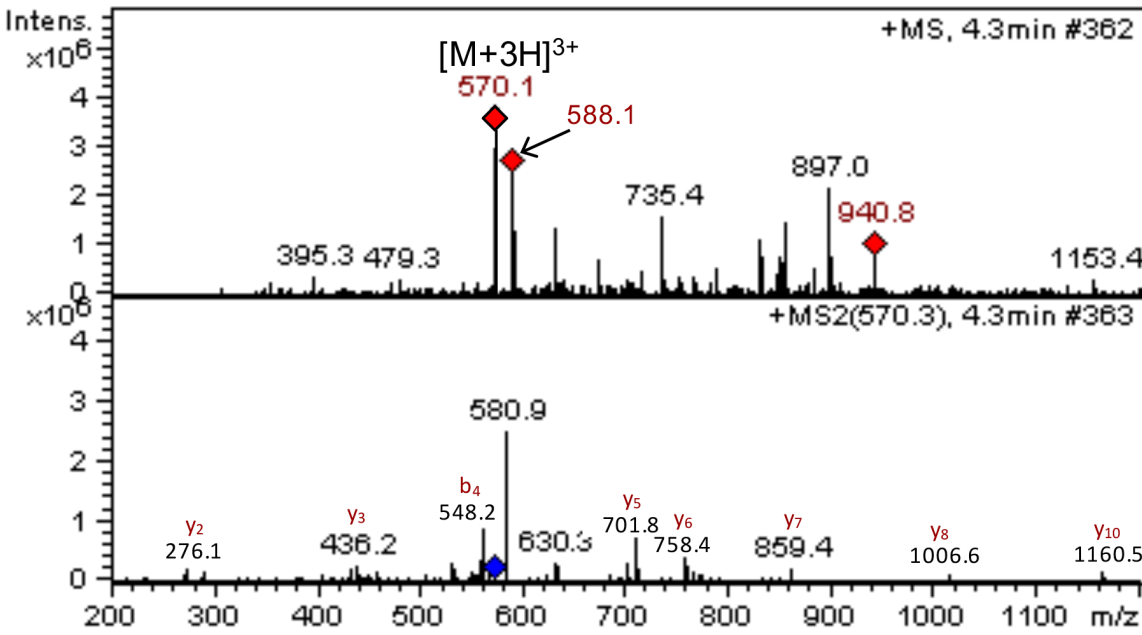

|   |       |
|---|-------|
| — | 570.3 |
| ■ | 638.0 |

# Fig. S3, C'

## EGF 18

<sup>715</sup>NVDECISSPCANNGVCIDQVNGYK<sup>738</sup>

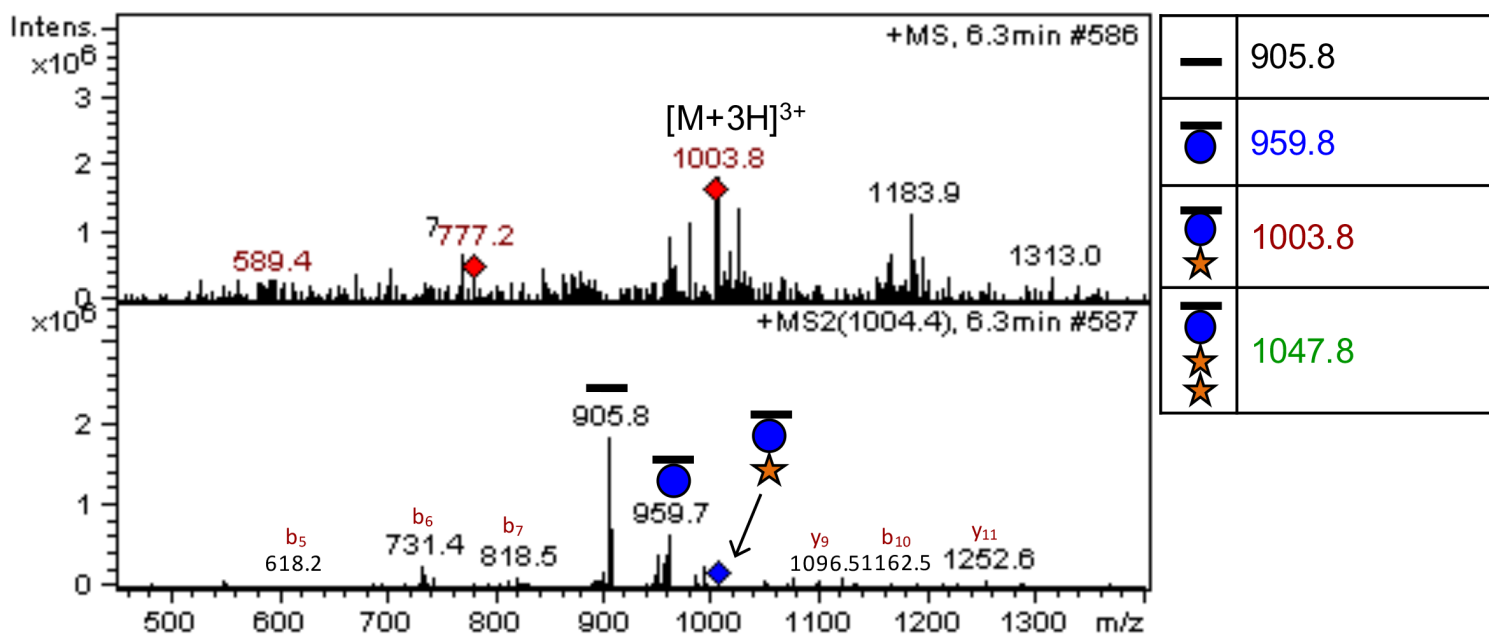

# Fig. S3, D'

## EGF 19

<sup>744</sup>GFYDAHCLSDVDECASNPCVNEGR<sup>767</sup>

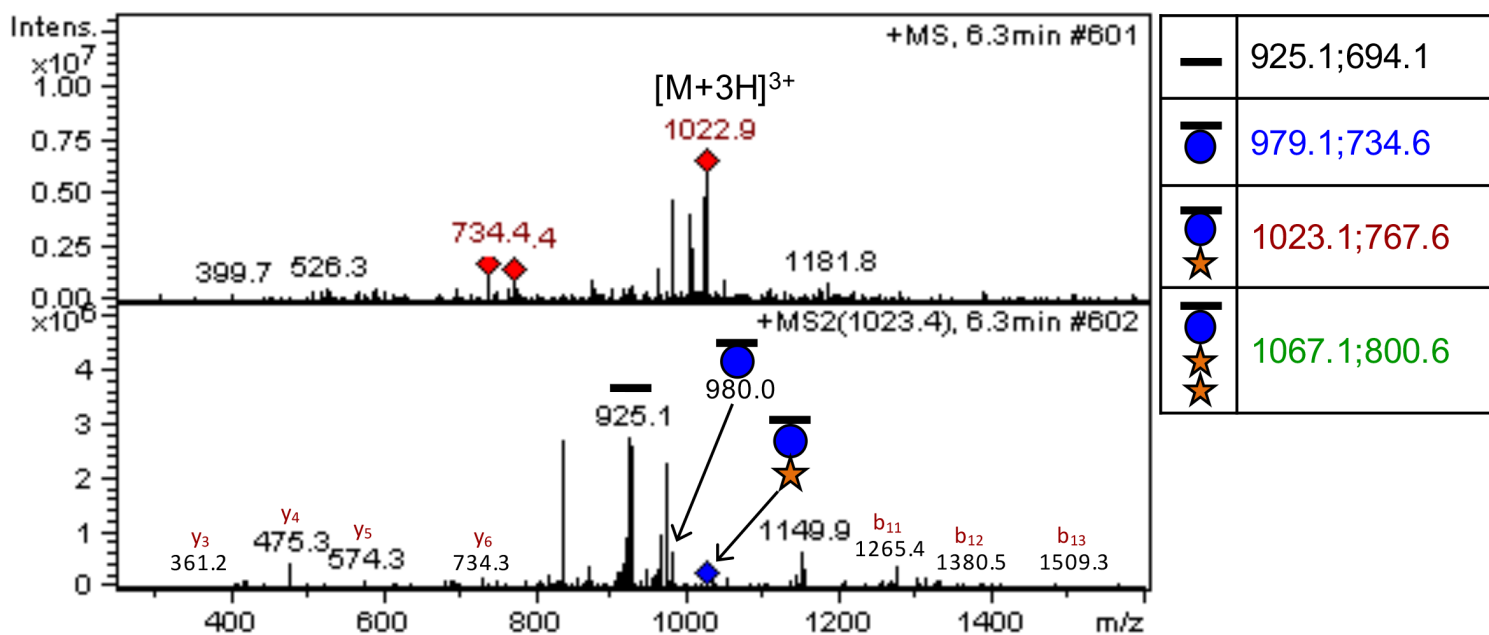

# Fig. S3, E'

## EGF 19

<sup>768</sup>CEDGINEFICHCPPGYTGK<sup>786</sup>

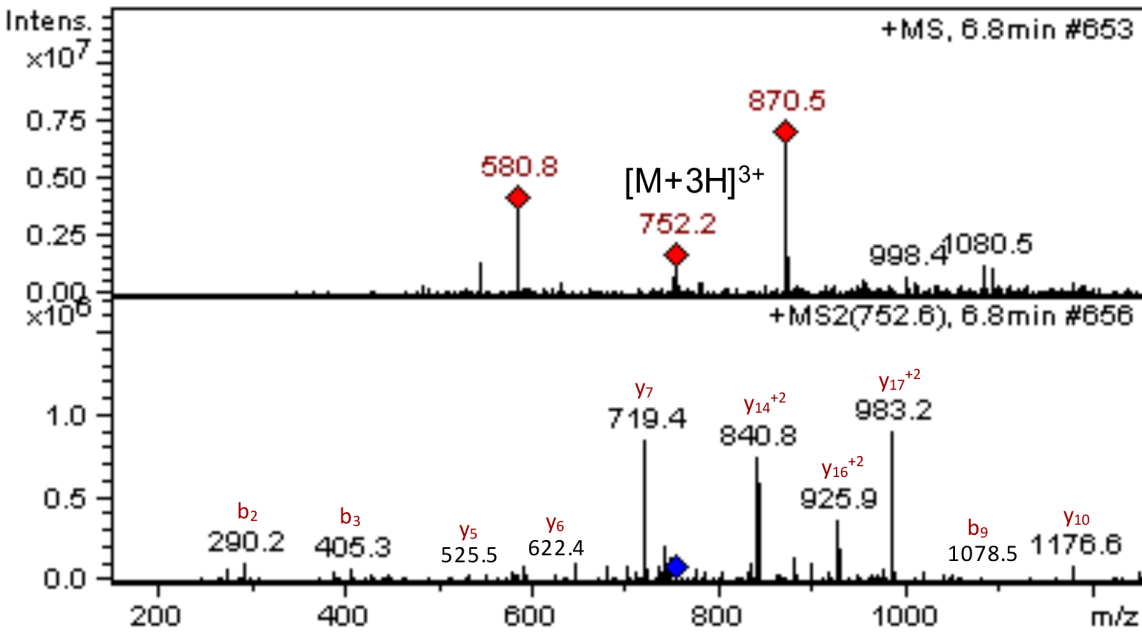

|                                                                                     |       |
|-------------------------------------------------------------------------------------|-------|
|  | 752.6 |
|  | 820.3 |

# Fig. S3, F'

## EGF 20

<sup>787</sup>RCELDIDECSSNPCQHGGTCYDK<sup>809</sup>

Note:  $[M+H]^{3+}$  is observed in spectra, but is not in EICs

-Fringe

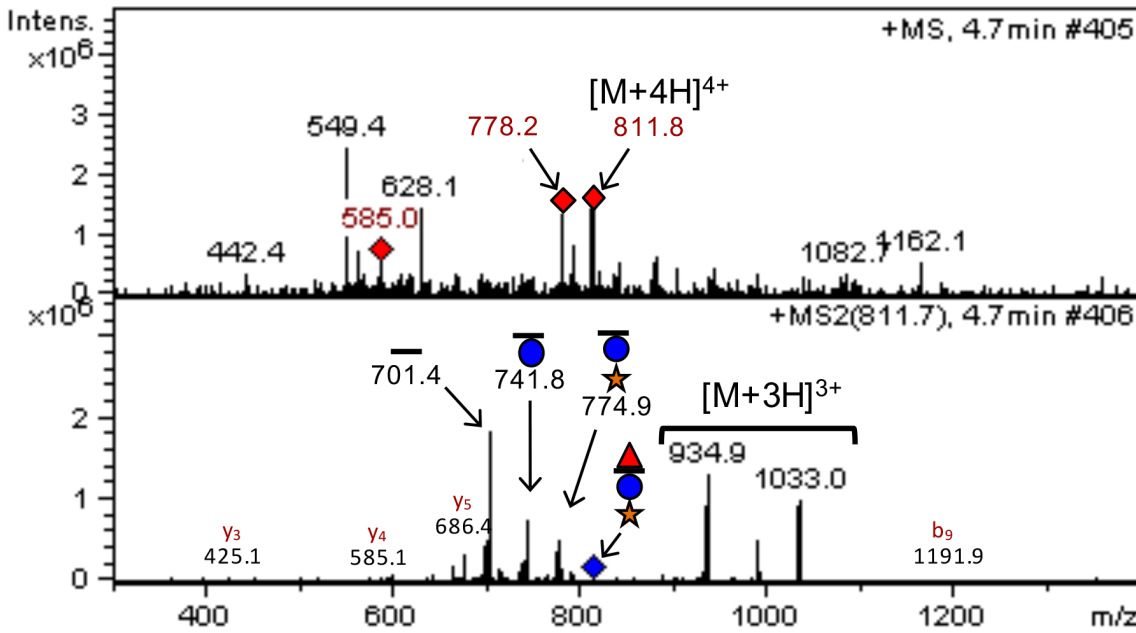

|   |   |   |   |                       |
|---|---|---|---|-----------------------|
| — | ● | ● | ★ | 701.4;741.9;<br>774.9 |
| ▲ | ▲ | ▲ | ★ | 737.9;778.4;<br>811.4 |
| ■ | ■ | ■ | ★ | 788.6;829.1;<br>862.1 |
| — | ▲ |   |   | 701.4;737.9           |
| ● | ▲ |   |   | 741.9;778.4           |
| ● | ▲ |   |   | 774.9;811.4           |
| ● | ▲ |   |   | 807.9;844.4           |

+Fringe

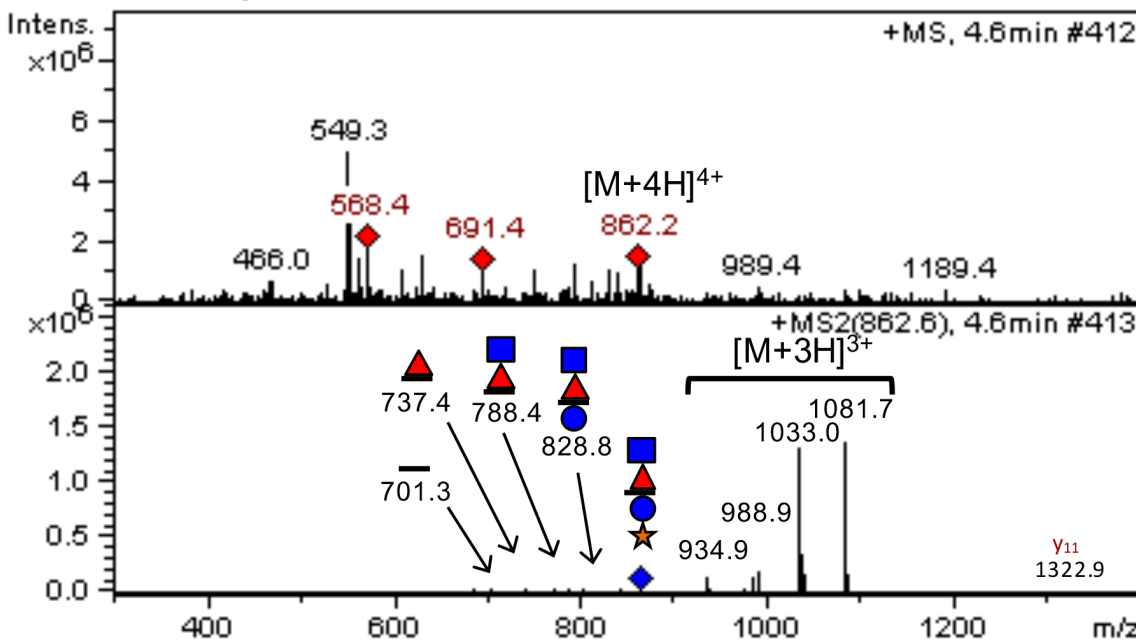

|   |   |   |   |                       |
|---|---|---|---|-----------------------|
| — | ● | ● | ★ | 701.3;741.8;<br>774.8 |
| ▲ | ▲ | ▲ | ★ | 737.8;778.3;<br>811.3 |
| ■ | ■ | ■ | ★ | 788.5;829.0;<br>862.0 |

# Fig. S3, G'

## EGF 20

$^{810}$ LNAFSCQCMPGYTGQK $^{825}$

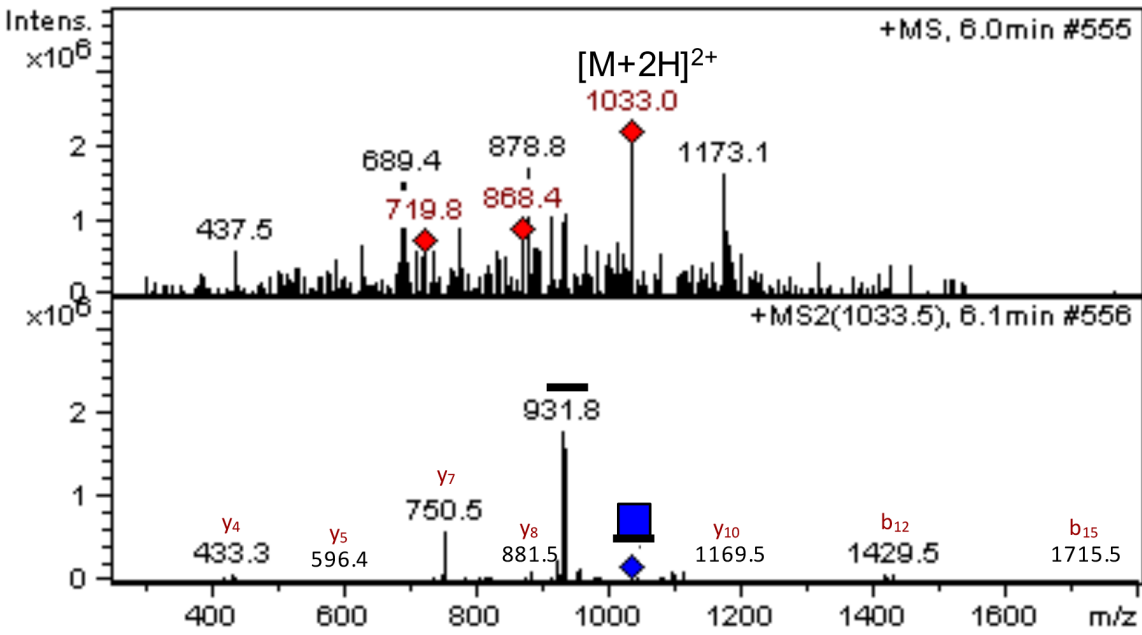

|   |              |
|---|--------------|
| — | 931.8;622.0  |
| ■ | 1033.3;689.7 |



# Fig. S3, H'

## EGF 21

$^{826}$ CETNIDDCVTNPGNGG**I**CIDKVNGYK $^{852}$

-Fringe

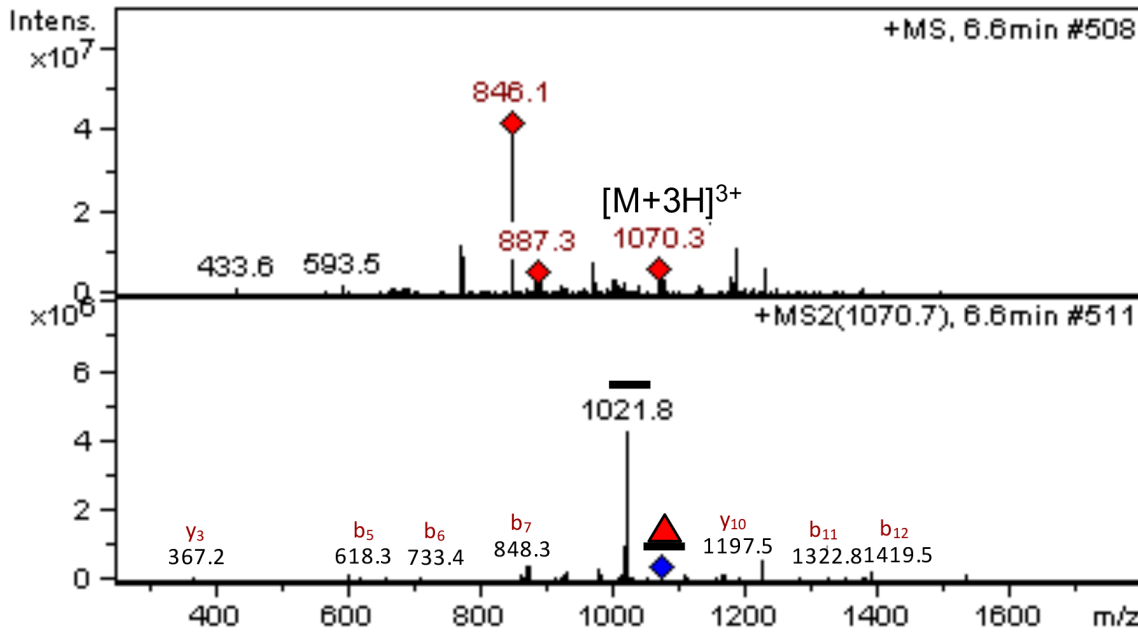

| For EICs |                |
|----------|----------------|
| —        | 1532.8;1021.8  |
| ▲        | 1605.8;1070.5  |
| ■        | 1707.3;1138.2  |
| ▲        | 1707.3;1138.2  |
| For MRM  |                |
| —        | 1021.9→i708.8  |
| ▲        | 1070.8→i1021.9 |
| ■        | 1138.6→i1021.9 |
| ▲        | 1138.6→i1021.9 |

+Fringe

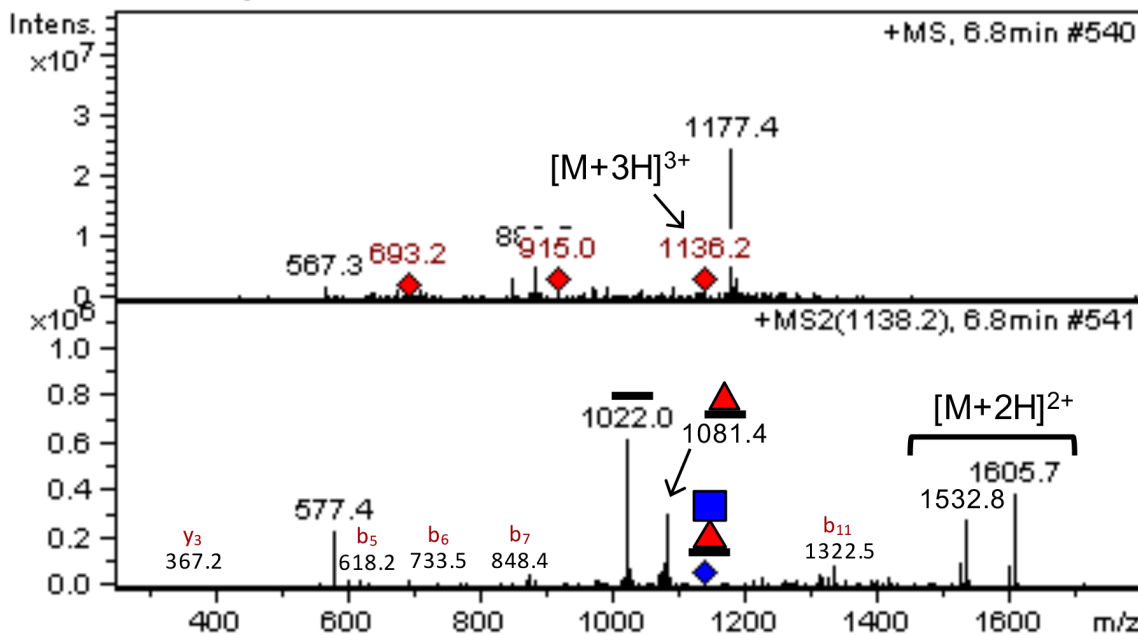

| For EICs |                |
|----------|----------------|
| —        | 1532.8;1022.0  |
| ▲        | 1605.8;1070.7  |
| ■        | 1707.3;1138.4  |
| ▲        | 1707.3;1138.4  |
| For MRM  |                |
| —        | 1021.9→i708.8  |
| ▲        | 1070.8→i1021.9 |
| ■        | 1138.6→i1021.9 |
| ▲        | 1138.6→i1021.9 |

# Fig. S3, I'

## EGF 21

$^{826}$ CETNIDDCVTNPGNGGTCIDK $^{847}$

Used for Fig. 8A; Note: Shows same results as previous peptide

-Fringe

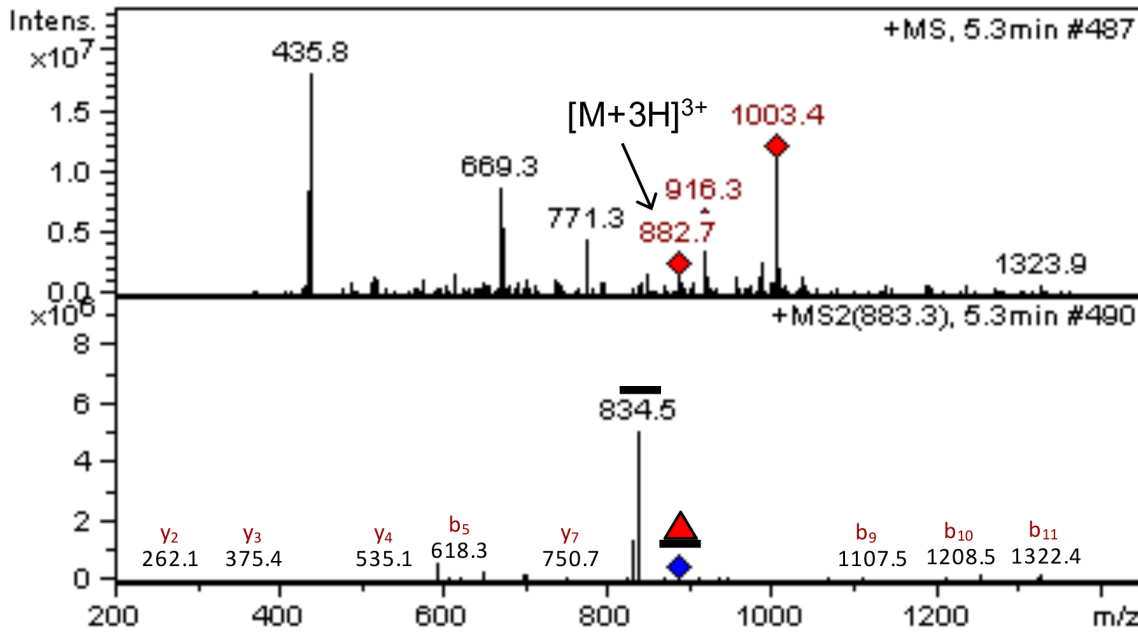

|   |              |
|---|--------------|
| — | 1250.9;834.5 |
| ▲ | 1323.9;883.2 |
| ■ | 1425.4;950.9 |

+Fringe

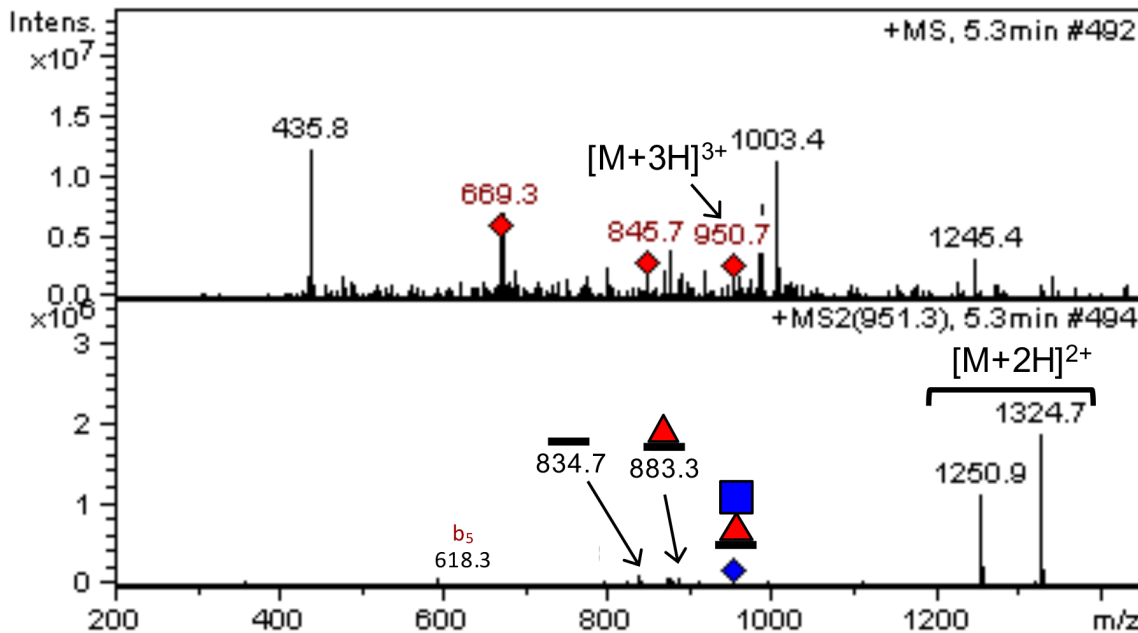

|   |              |
|---|--------------|
| — | 1250.9;834.7 |
| ▲ | 1323.9;883.4 |
| ■ | 1425.4;951.1 |

# Fig. S3, J'

## EGF 22

<sup>900</sup>TGRYCDEDIDECSL<sup>913</sup>

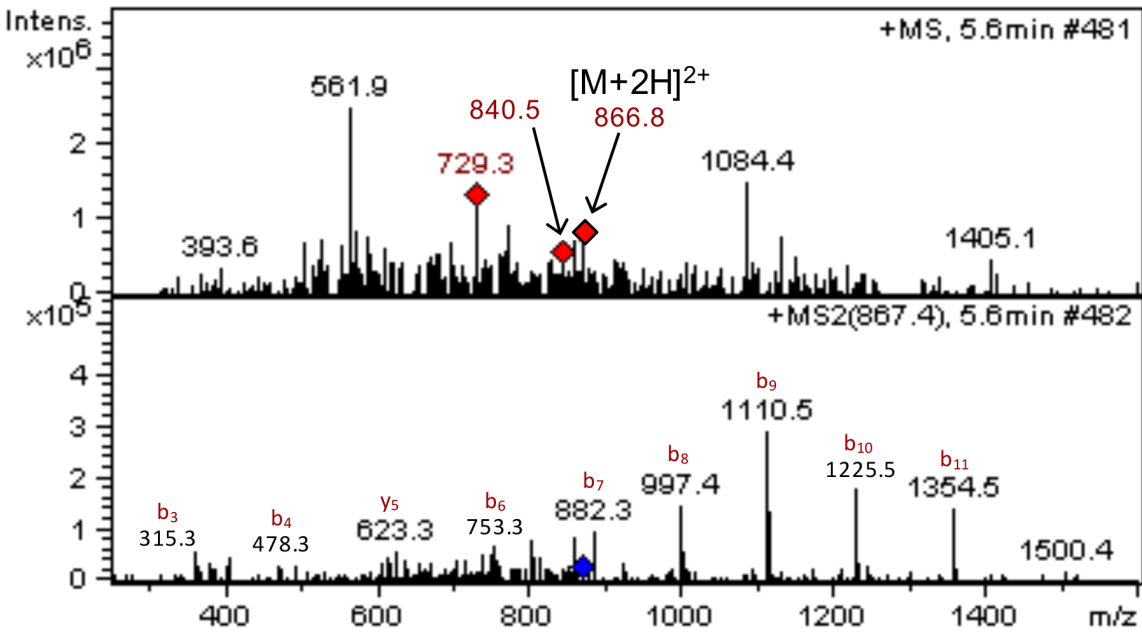

|   |       |
|---|-------|
| — | 867.4 |
| ■ | 968.9 |

# Fig. S3, K'

## EGF 23

<sup>919</sup>NGASCLNVPGSYR<sup>931</sup>

-Fringe

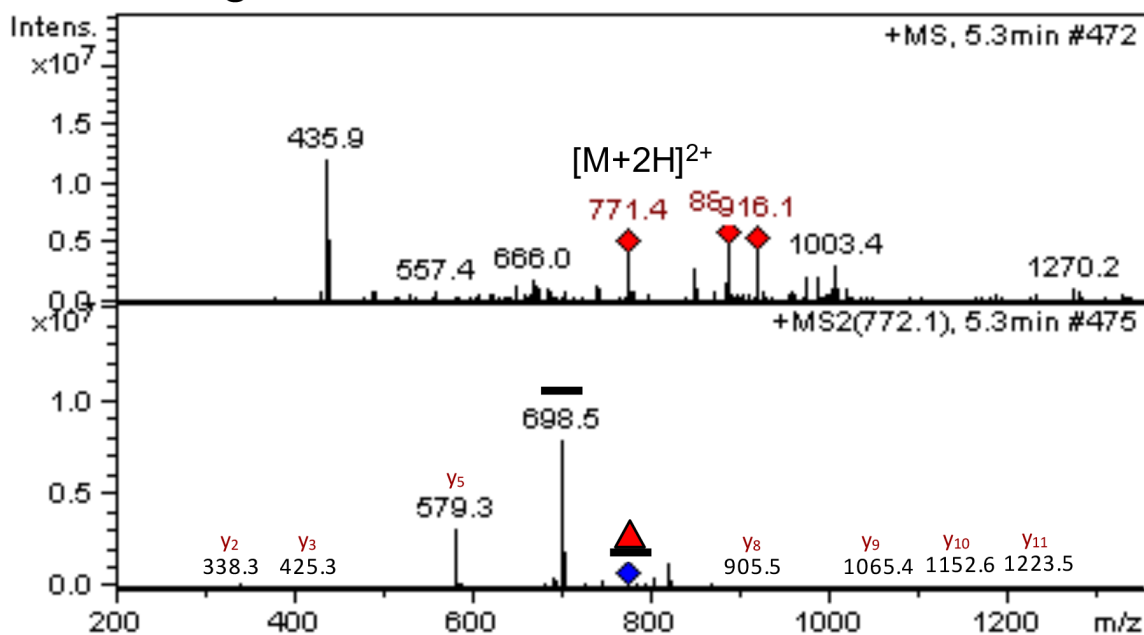

|   |       |
|---|-------|
| — | 698.5 |
| ▲ | 771.5 |
| ■ | 873.0 |

+Fringe

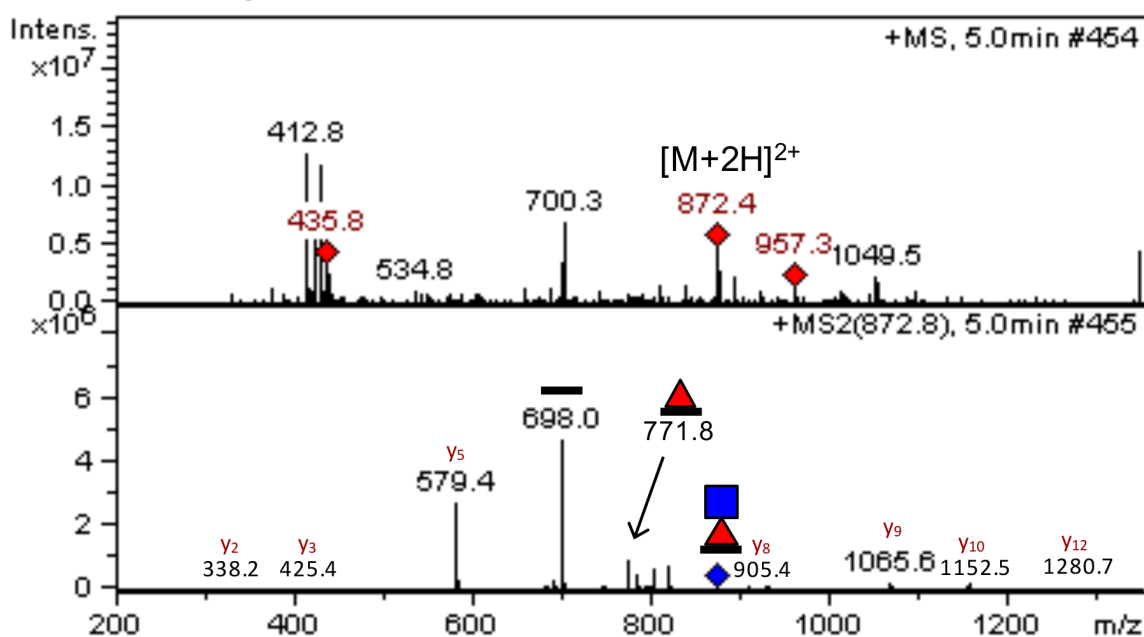

|   |       |
|---|-------|
| — | 698.0 |
| ▲ | 771.0 |
| ■ | 872.5 |

# Fig. S3, L'

## EGF 24

<sup>939</sup>EGRDCAINTDDCASFPCQNGGTCLDGIGDY<sup>968</sup>

-Fringe

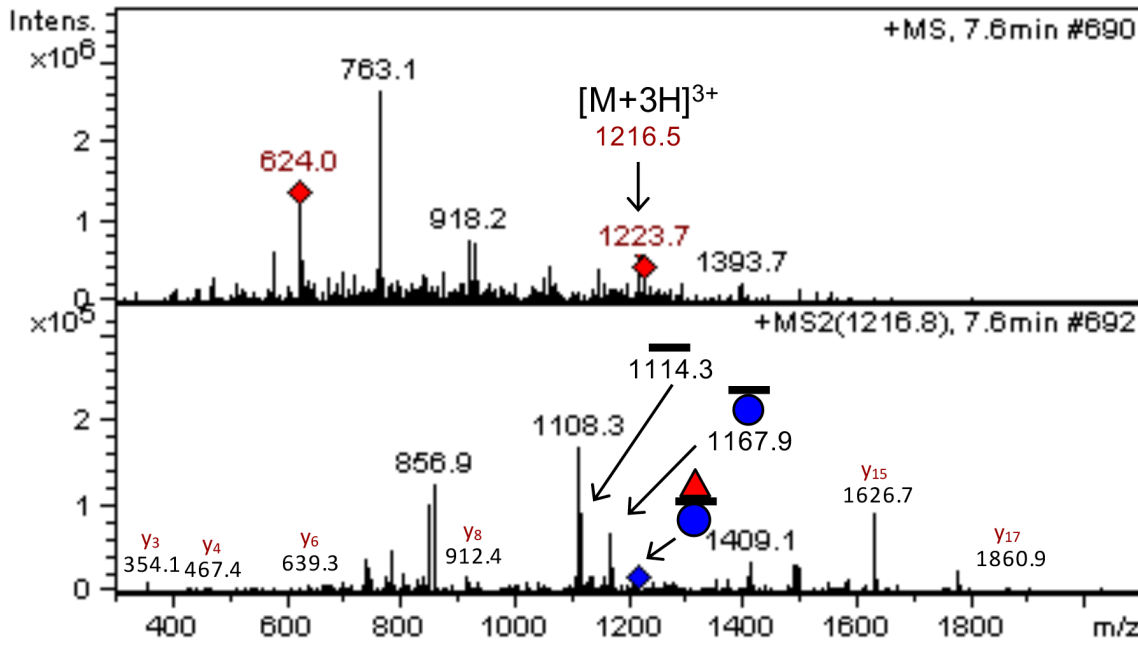

|                   |                                 |
|-------------------|---------------------------------|
| — ●               | 1670.8;1114.3;<br>1751.8;1168.3 |
| ▲ ▲<br>● ●        | 1743.8;1163.0;<br>1824.8;1217.0 |
| ■ ■<br>▲ ▲<br>● ● | 1845.3;1230.7;<br>1926.3;1284.7 |
| — ▲               | 1670.8;1114.3;<br>1743.8;1163.0 |
| — ▲<br>● ●        | 1751.8;1168.3;<br>1824.8;1217.0 |
| — ▲<br>● ●<br>★ ★ | 1817.8;1212.3;<br>1890.8;1261.0 |
| ● ●<br>★ ★<br>★ ★ | 1883.8;1256.3;<br>1956.8;1305.0 |

+Fringe

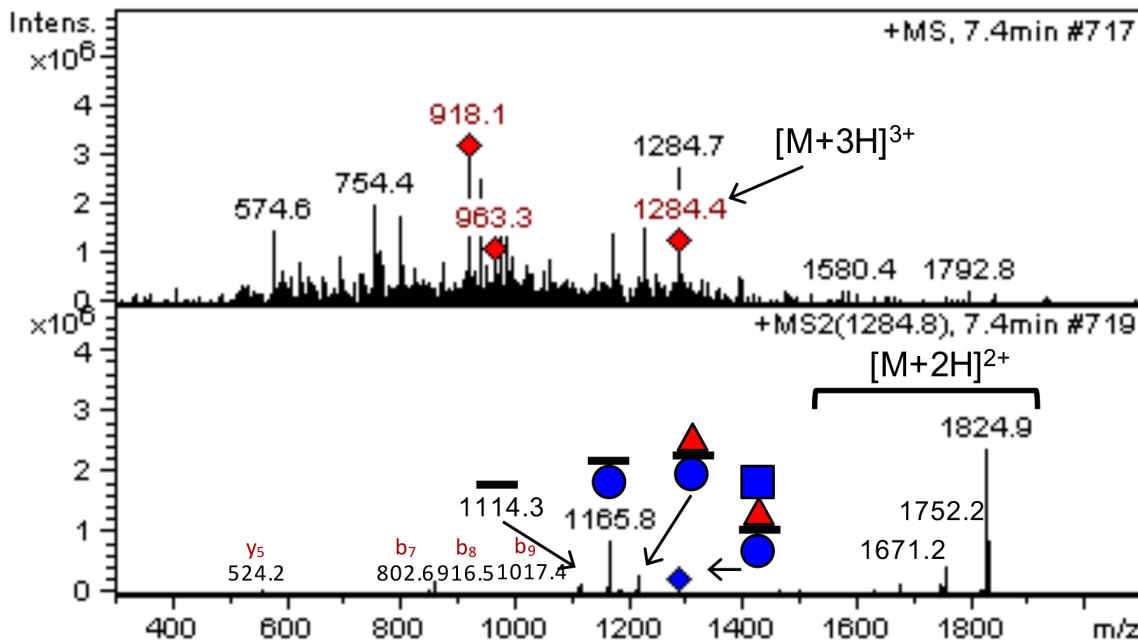

|                   |                                 |
|-------------------|---------------------------------|
| — ●               | 1670.8;1114.3;<br>1751.8;1168.3 |
| ▲ ▲<br>● ●        | 1743.8;1163.0;<br>1824.8;1217.0 |
| ■ ■<br>▲ ▲<br>● ● | 1845.3;1230.7;<br>1926.3;1284.7 |

# Fig. S3, M'

## EGF 25

<sup>972</sup>CVDGFDGKHCETDINECLSQPCQNGATCSQY<sup>1002</sup>

-Fringe

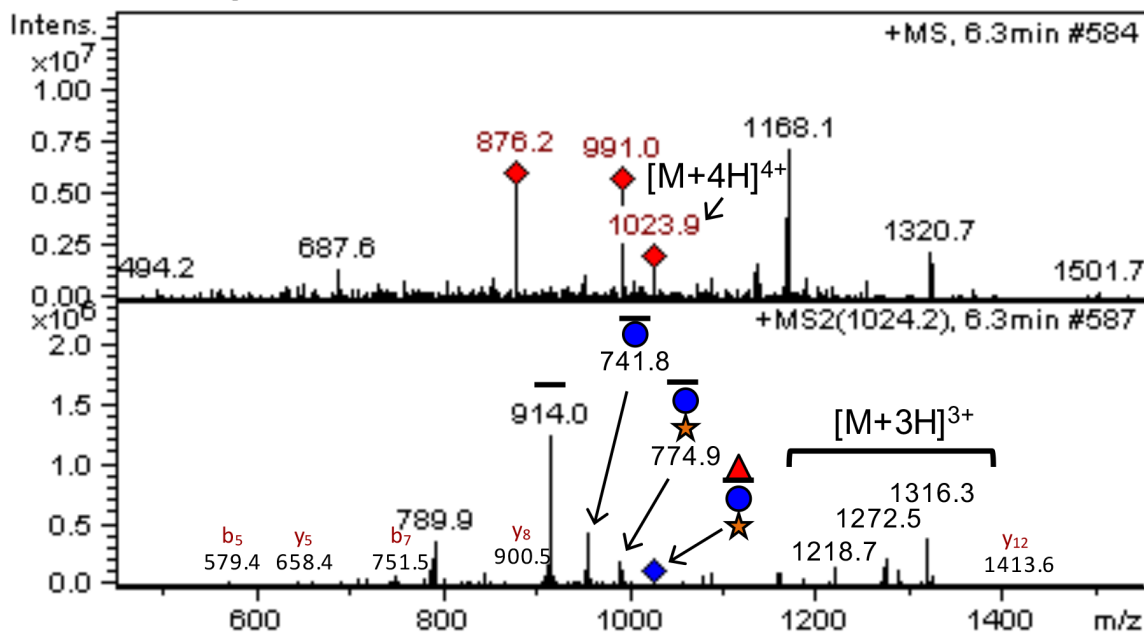

|   |   |   |   |                                                   |
|---|---|---|---|---------------------------------------------------|
| — | ● | ● | ★ | 1218.7;914.0;<br>1272.7;954.5;<br>1316.7;987.5    |
| ▲ | ▲ | ▲ | ★ | 1267.4;950.5;<br>1321.4;991.0;<br>1365.4;1024.0   |
| ■ | ■ | ■ | ★ | 1335.1;1001.2;<br>1389.1;1041.7;<br>1433.1;1074.7 |
| — | ▲ |   |   | 1218.7;914.0;<br>1267.4;950.5                     |
| ● | ▲ |   |   | 1272.7;954.5;<br>1321.4;991.0                     |
| ● | ▲ |   |   | 1316.7;987.5;<br>1365.4;1024.0                    |
| ● | ▲ | ★ | ★ | 1360.7;1020.5;<br>1409.4;1057.0                   |

+Fringe

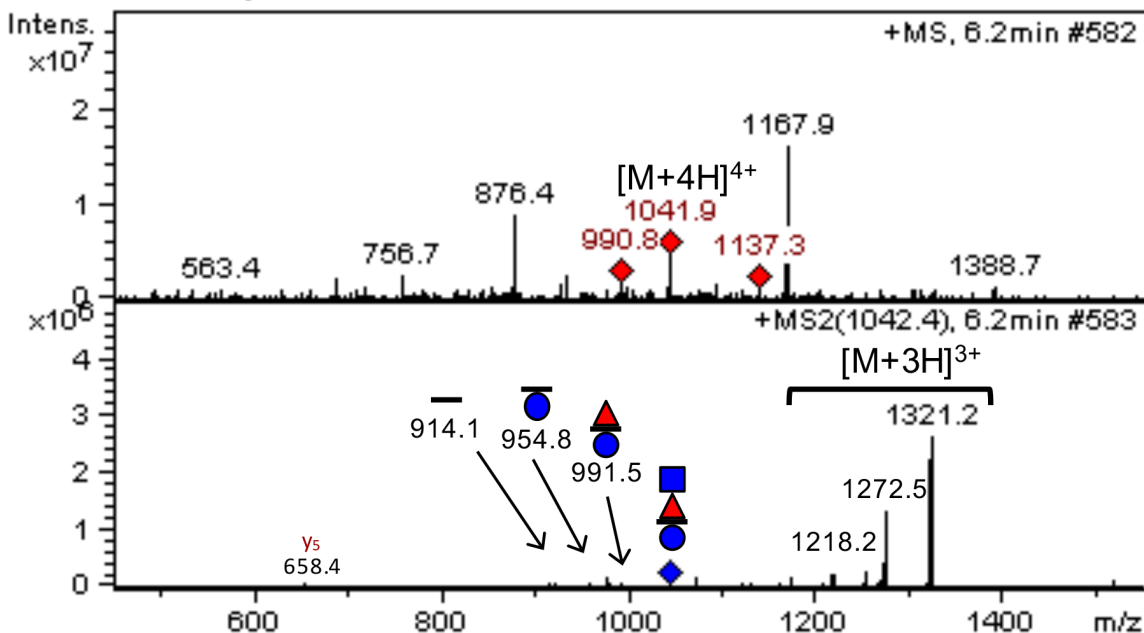

|   |   |   |   |                                                   |
|---|---|---|---|---------------------------------------------------|
| — | ● | ● | ★ | 1218.2;914.1;<br>1272.2;954.6;<br>1316.2;987.6    |
| ▲ | ▲ | ▲ | ★ | 1266.9;950.6;<br>1320.9;991.1;<br>1364.9;1024.1   |
| ■ | ■ | ■ | ★ | 1334.6;1001.3;<br>1388.6;1041.8;<br>1432.6;1074.8 |

# Fig. S3, N'

## EGF 25

<sup>1015</sup>SGINCQTNDEDCTESSCL<sup>1032</sup>

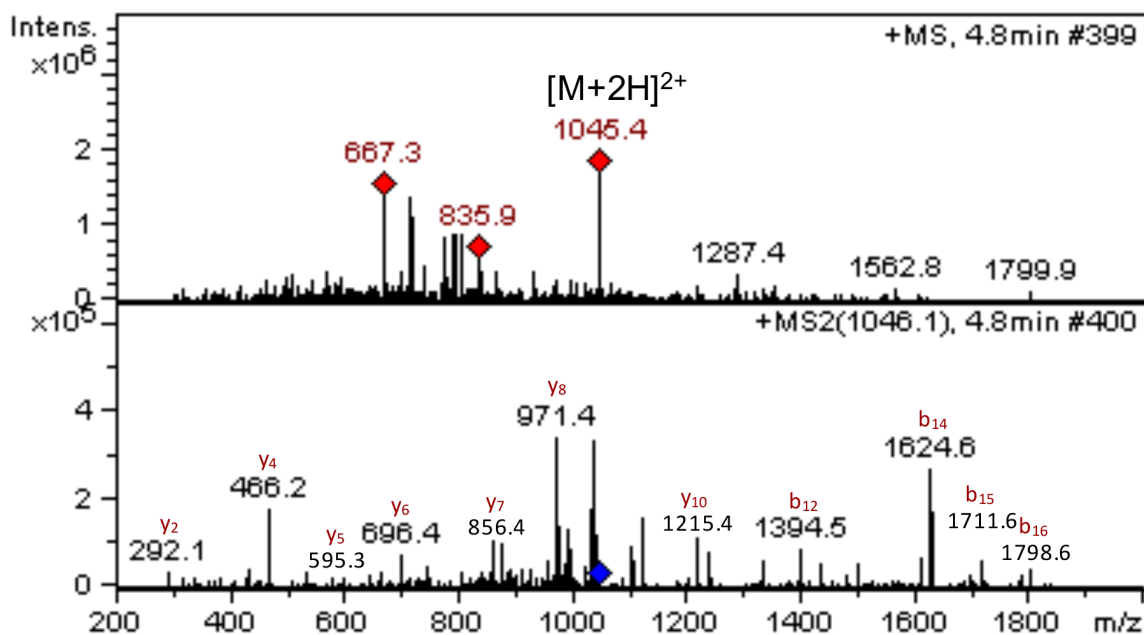

|   |              |
|---|--------------|
| — | 1046.1;698.2 |
| ■ | 1147.6;765.9 |

# Fig. S3, O'

## EGF 26

$^{1033}\text{NGG}\underline{\text{S}}\text{CIDGINGY}^{1044}$

### -Fringe

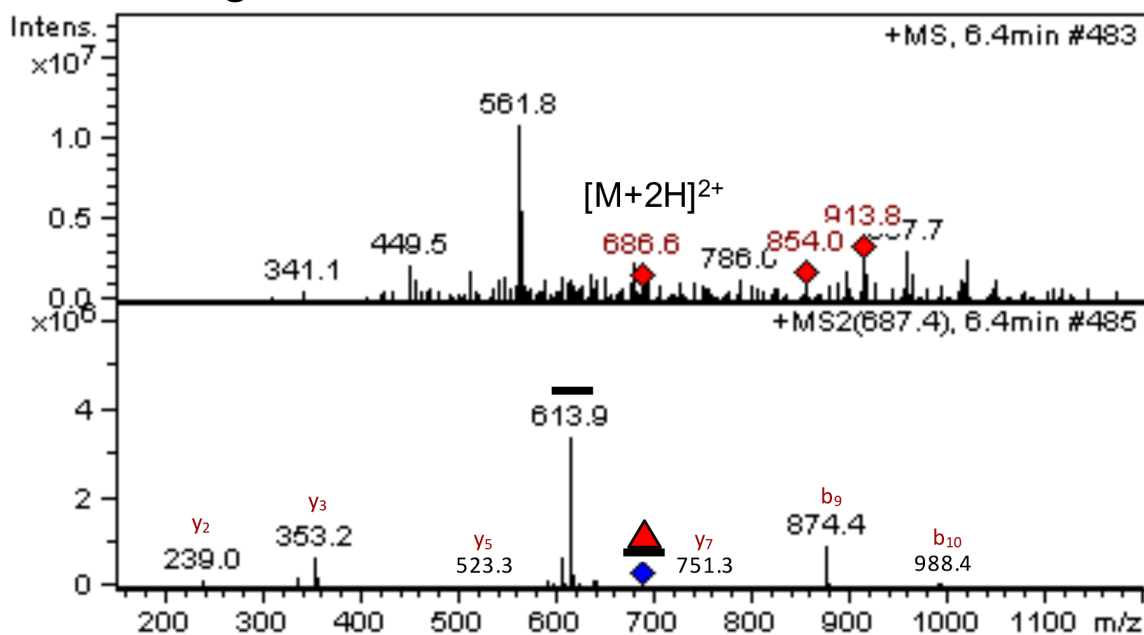

### +Fringe

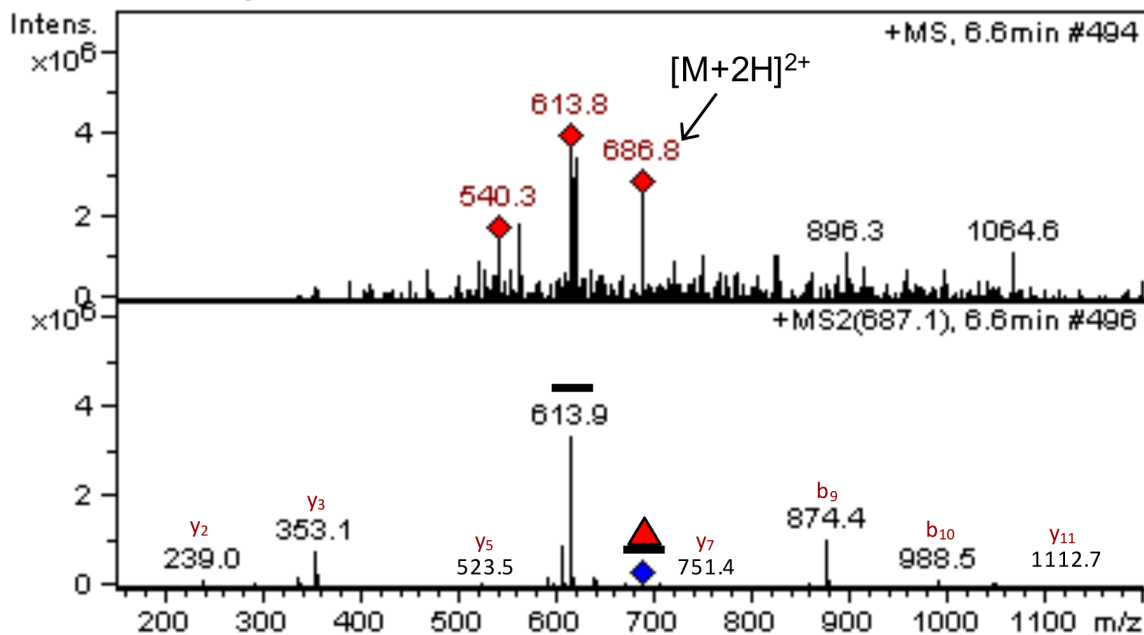



# Fig. S3, P'

## EGF 26

<sup>1050</sup>AGYSGANQCQY<sup>1059</sup>

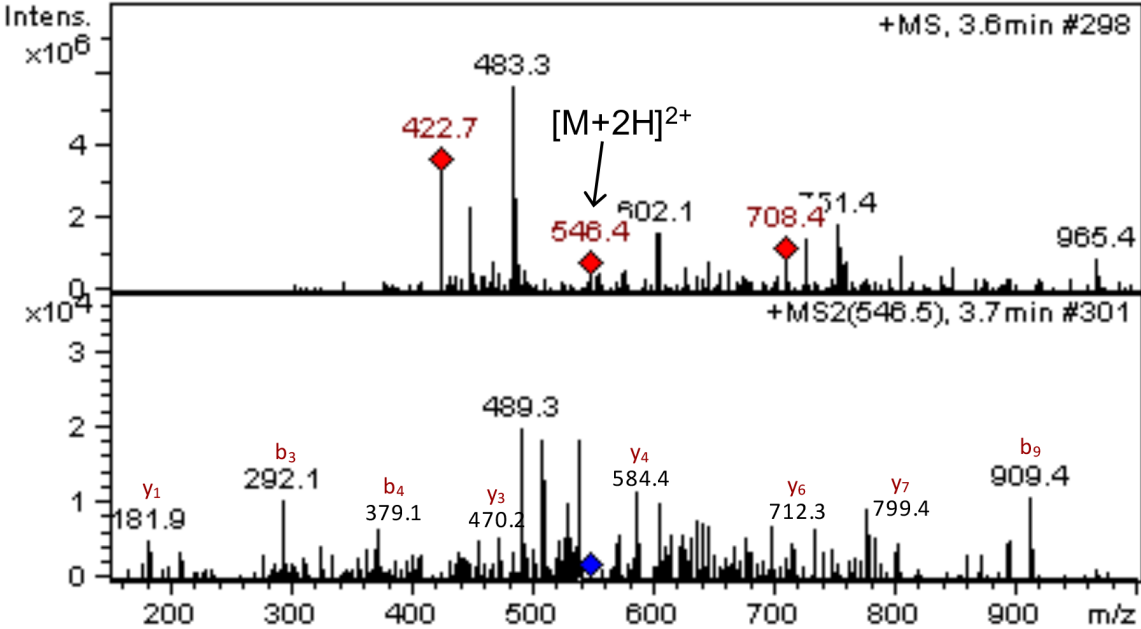

|   |       |
|---|-------|
| — | 546.5 |
| ■ | 648.0 |

# Fig. S3, Q'

## EGF 27

<sup>1060</sup>KLNKCDSNPCLNGATCHEQNNEY<sup>1082</sup>

-Fringe

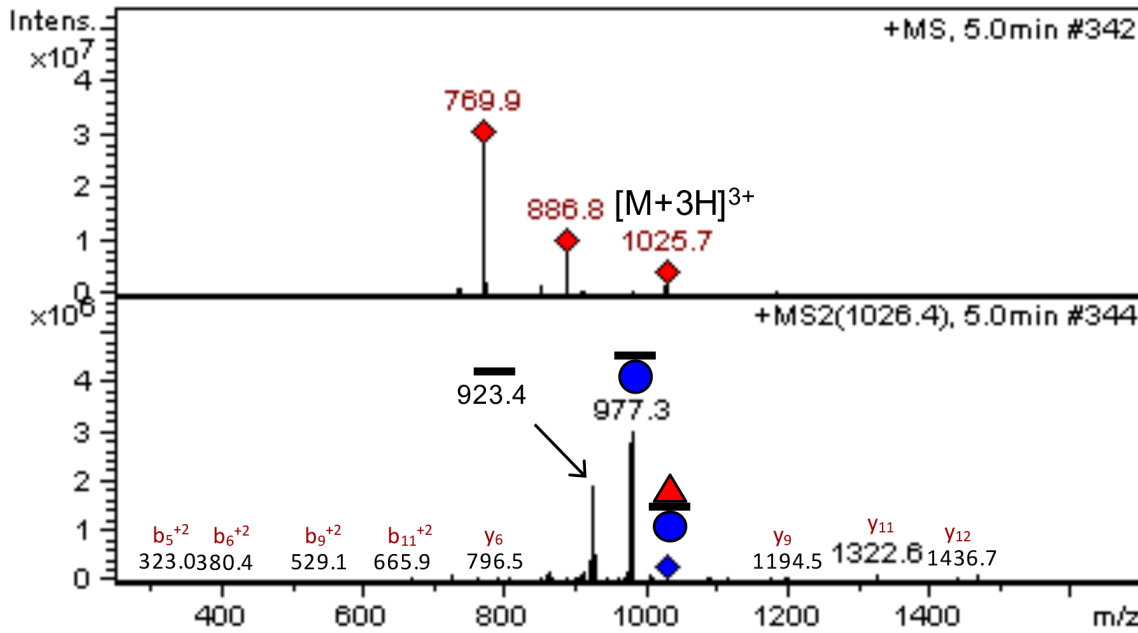

|   |   |                                 |
|---|---|---------------------------------|
| — | ● | 1384.6;923.4;<br>1465.6;977.4   |
| ▲ | ▲ | 1457.6;972.1;<br>1538.6;1026.1  |
| ■ | ■ | 1559.1;1039.8;<br>1640.1;1093.8 |
| — | ▲ | 1384.6;923.4;<br>1457.6;972.1   |
| — | ▲ | 1465.6;977.4;<br>1538.6;1026.1  |
| ● | ▲ | 1531.6;1021.4;<br>1604.6;1070.1 |
| ★ | ★ | 1597.6;1065.4;<br>1670.6;1114.1 |

+Fringe

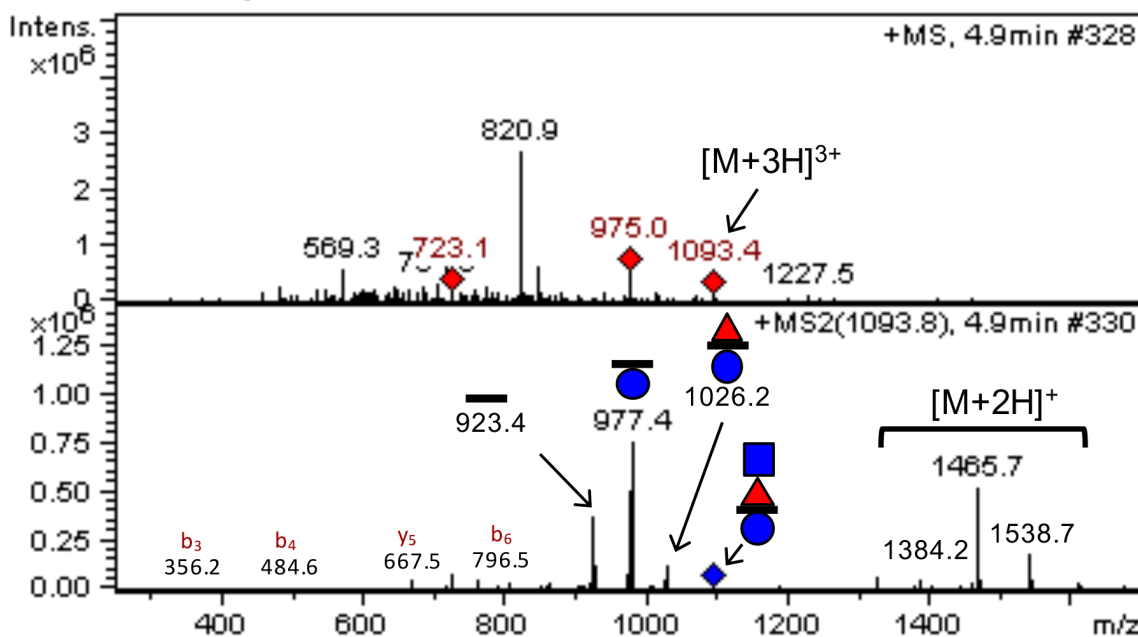

|   |   |                                 |
|---|---|---------------------------------|
| — | ● | 1384.2;923.4;<br>1465.2;977.4   |
| ▲ | ▲ | 1457.2;972.1;<br>1538.2;1026.1  |
| ■ | ■ | 1558.7;1039.8;<br>1639.7;1093.8 |

# Fig. S3, R'

## EGF 27

<sup>1091</sup>TGKQCSEYVDW<sup>1101</sup>

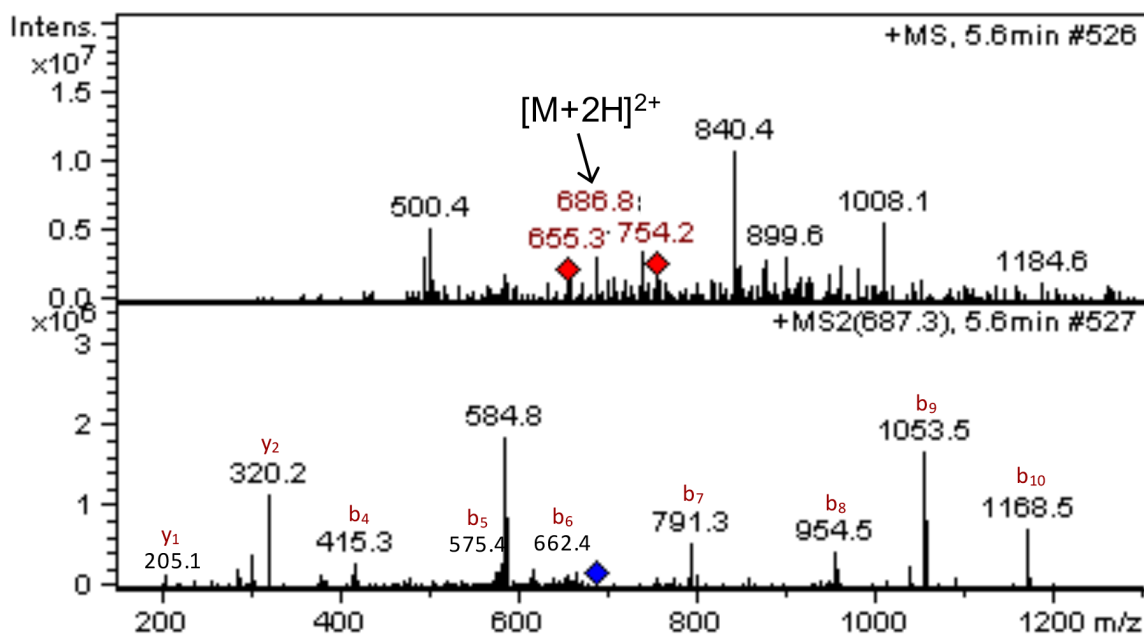

|   |       |
|---|-------|
| — | 687.3 |
| ■ | 788.8 |

# Fig. S3, S'

## EGF 28

<sup>1094</sup>QCSEYVDWCGQSPCENGATCSQMK<sup>1117</sup>

-Fringe

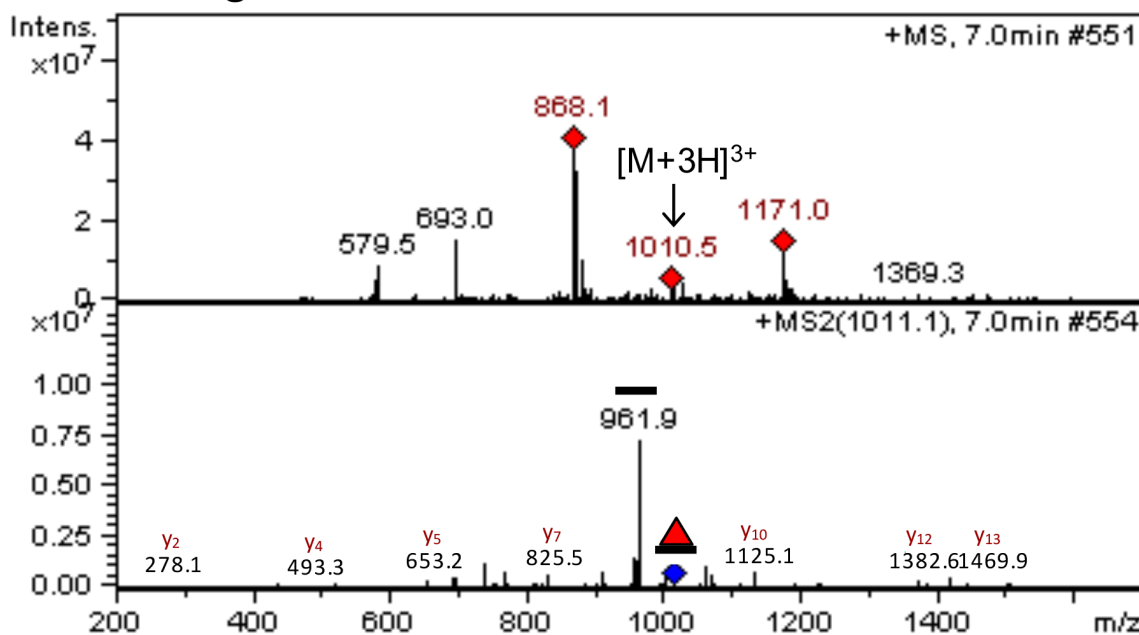

For EICs

|   |        |
|---|--------|
| — | 961.9  |
| ▲ | 1010.6 |
| ■ | 1078.3 |

For MRM

|   |                 |
|---|-----------------|
| — | 962.0 → i1124.9 |
| ▲ | 1011.3 → i962.0 |
| ■ | 1079.0 → i962.0 |

+Fringe

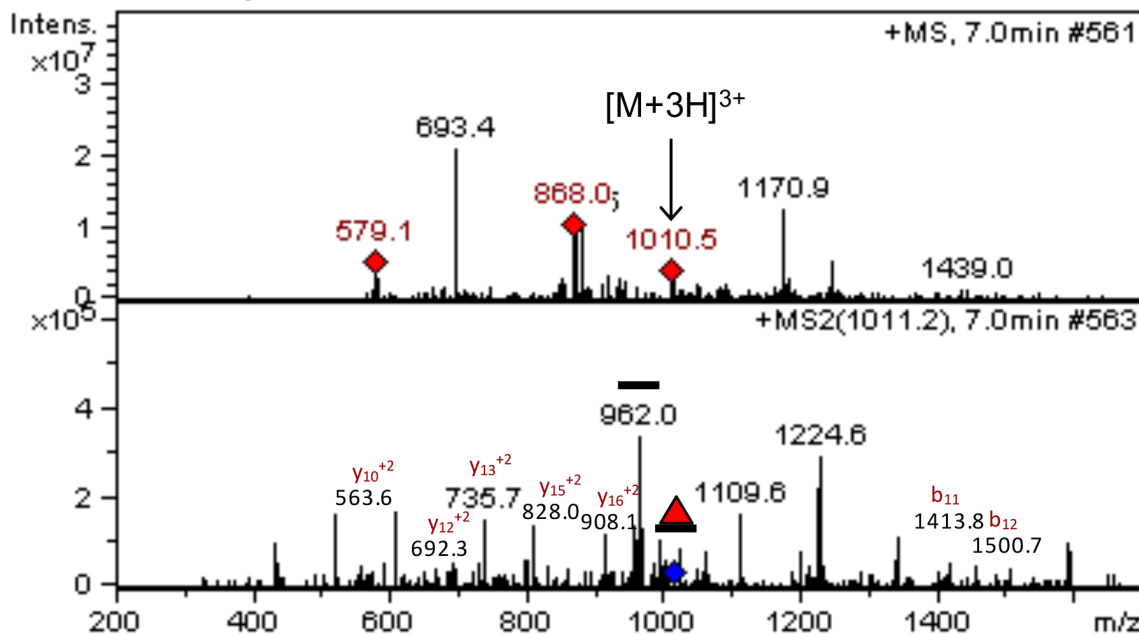

For EICs

|   |        |
|---|--------|
| — | 962.0  |
| ▲ | 1010.7 |
| ■ | 1078.4 |

For MRM

|   |                 |
|---|-----------------|
| — | 962.0 → i1124.9 |
| ▲ | 1011.3 → i962.0 |
| ■ | 1079.0 → i962.0 |

# Fig. S3, T'

## EGF 28

<sup>1129</sup>TGKLCDVQTISCQDAADRKGL<sup>1149</sup>

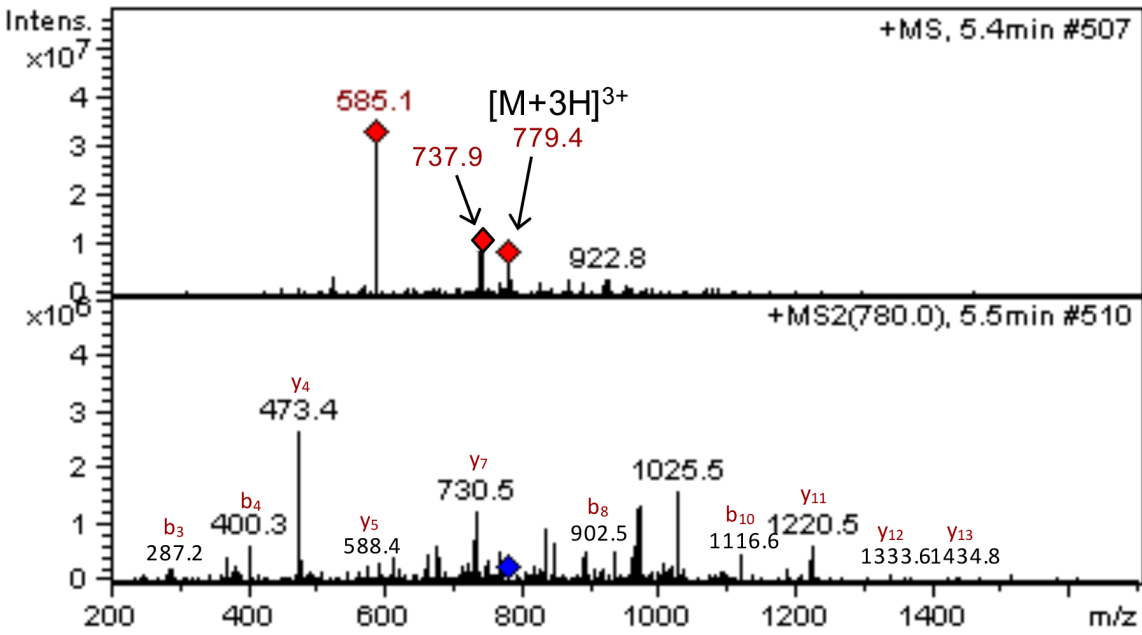

|   |             |
|---|-------------|
| — | 780.0;585.1 |
| ■ | 847.7;635.8 |

# Fig. S3, U'

## EGF 30

<sup>1183</sup>EIDECQSQPCQNGGTCR<sup>1199</sup>

-Fringe

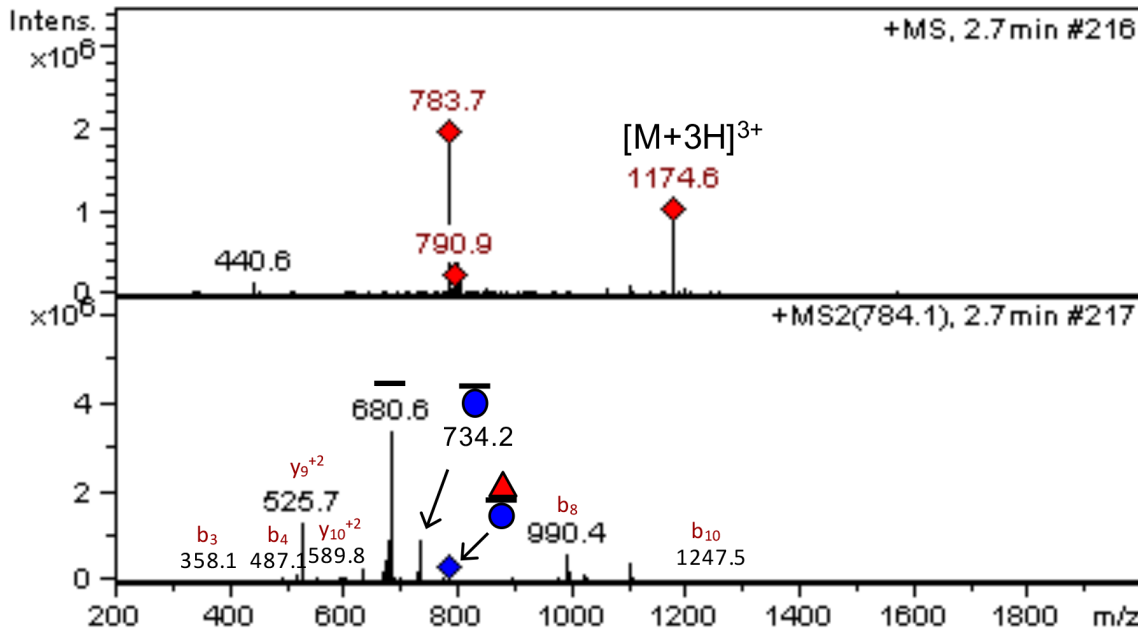

|   |   |                               |
|---|---|-------------------------------|
| — | ● | 1020.5;680.6;<br>1101.5;734.6 |
| ▲ | ▲ | 1093.5;729.3;<br>1174.5;783.3 |
| ■ | ■ | 1195.0;797.0;<br>1276.0;851.0 |
| — | ▲ | 1020.5;680.6;<br>1093.5;729.3 |
| — | ▲ | 1101.5;734.6;<br>1174.5;783.3 |
| ● | ▲ | 1167.5;778.6;<br>1240.5;827.3 |
| ★ | ★ | 1233.5;822.6;<br>1306.5;871.3 |

+Fringe

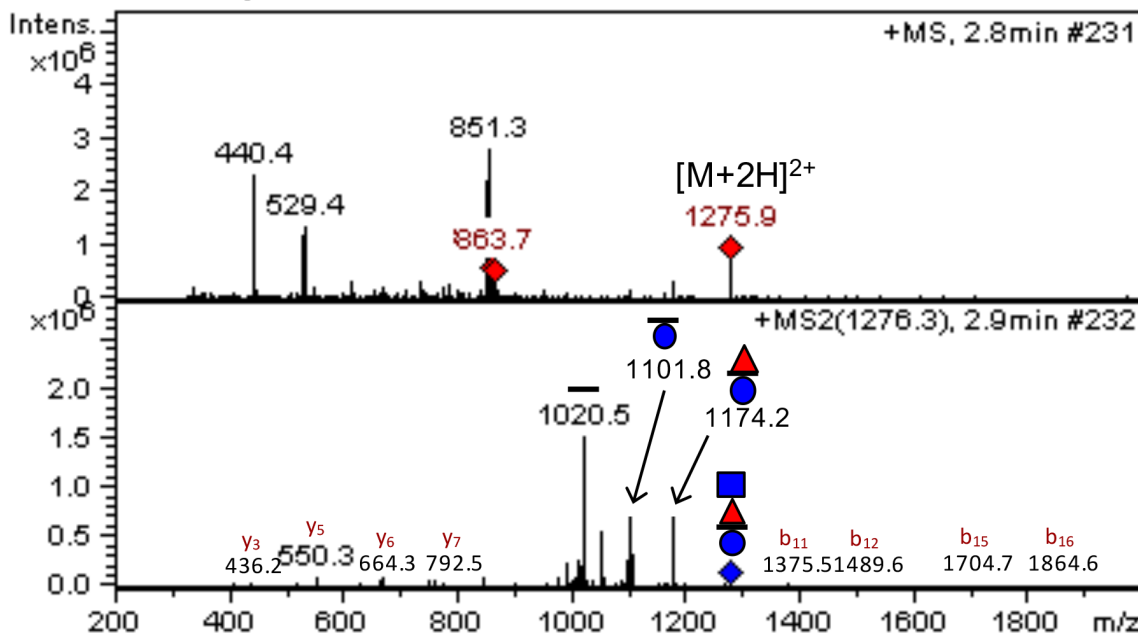

|   |   |                               |
|---|---|-------------------------------|
| — | ● | 1020.5;680.6;<br>1101.5;734.6 |
| ▲ | ▲ | 1093.5;729.3;<br>1174.5;783.3 |
| ■ | ■ | 1195.0;797.0;<br>1276.0;851.0 |

# Fig. S3, V'

## EGF 31

<sup>1211</sup>QGFQGQNC~~E~~LNIDDCAPNPCQNGG**I**CHDR<sup>1239</sup>

-Fringe

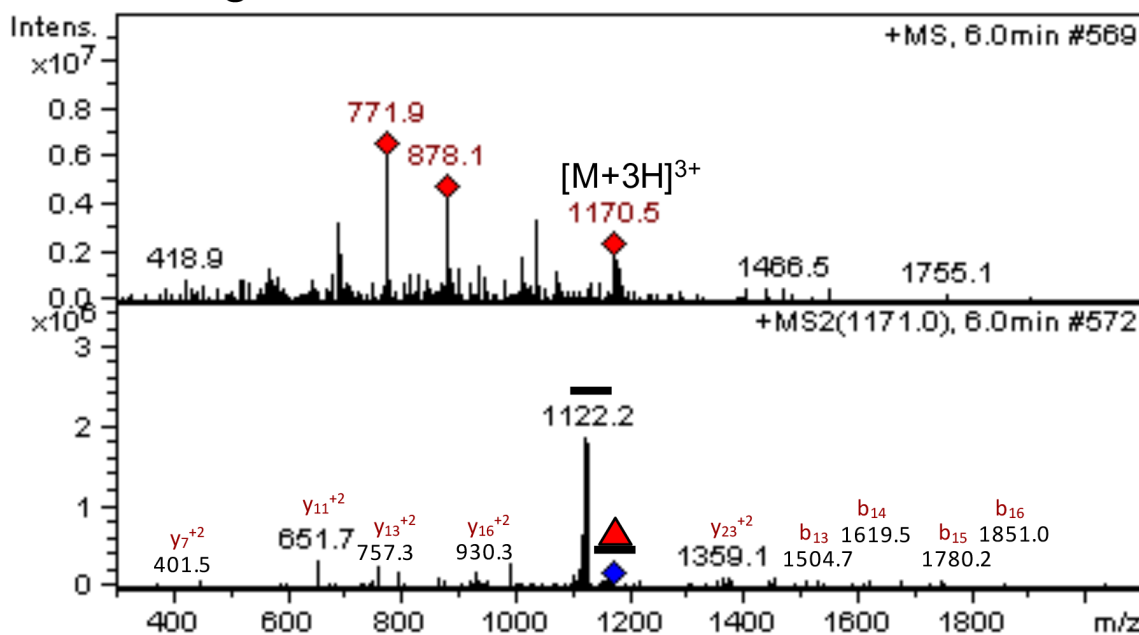

| For EICs |                |
|----------|----------------|
| —        | 1122.2;841.9   |
| ▲        | 1170.9;878.4   |
| ■        | 1238.6;929.1   |
| For MRM  |                |
| —        | 1122.1→i916.6  |
| ▲        | 1171.1→i1122.1 |
| ■        | 1238.8→i1122.1 |

+Fringe

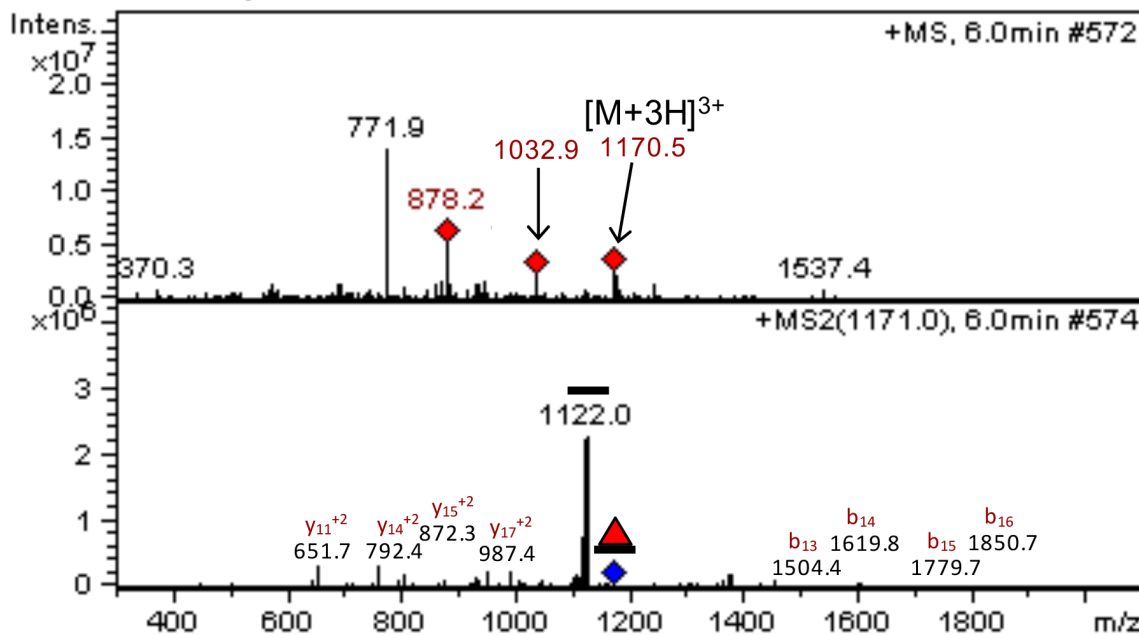

| For EICs |                |
|----------|----------------|
| —        | 1122.0;841.9   |
| ▲        | 1170.7;878.4   |
| ■        | 1238.4;929.1   |
| For MRM  |                |
| —        | 1122.1→i916.6  |
| ▲        | 1171.1→i1122.1 |
| ■        | 1238.8→i1122.1 |

# Fig. S3, W'

## EGF 32

<sup>1239</sup>RVMNFSCSCPPGTMGIICEINKDDCKPGACHNNGSCID<sup>1276</sup>

-Fringe

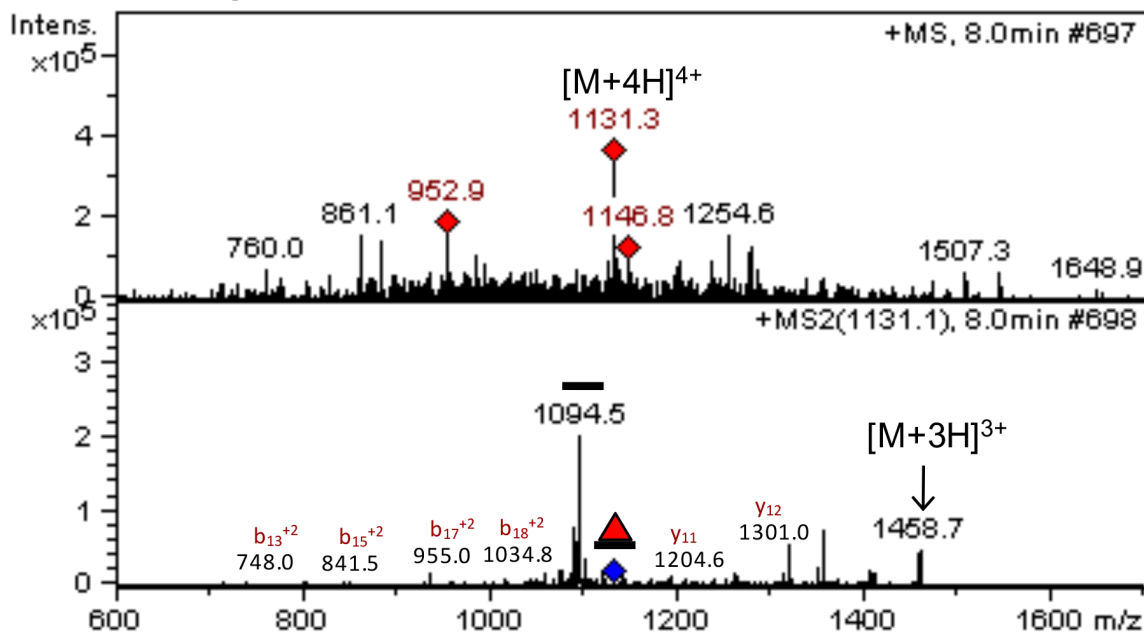

+Fringe

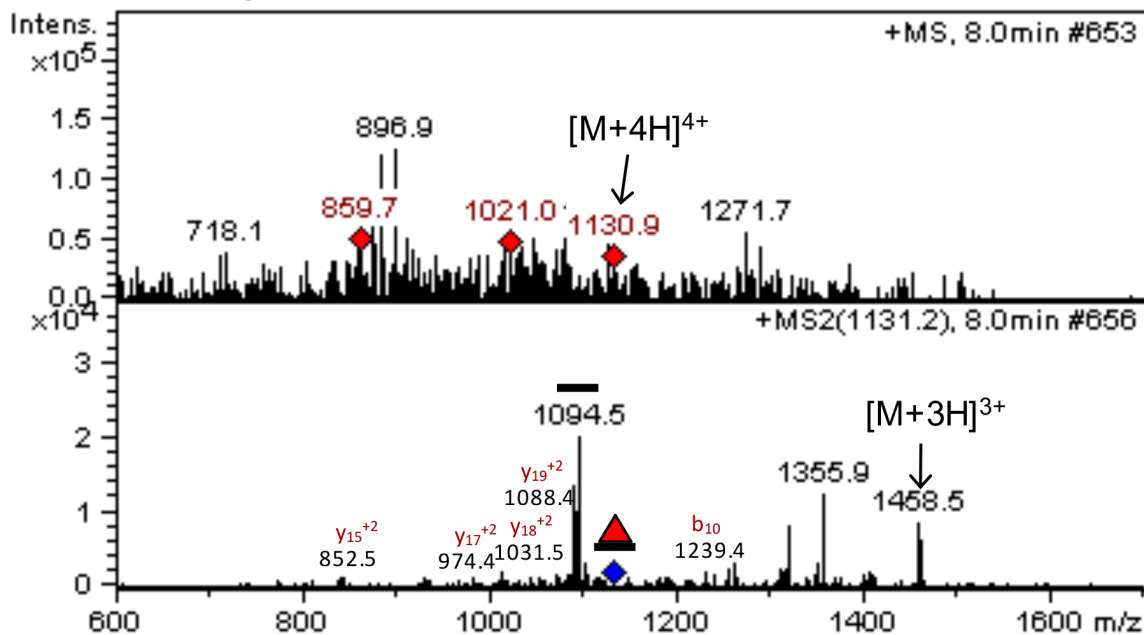



# Fig. S3, X'

## EGF 33

<sup>1303</sup>SNPCSNAGTLDCVQL<sup>1317</sup>

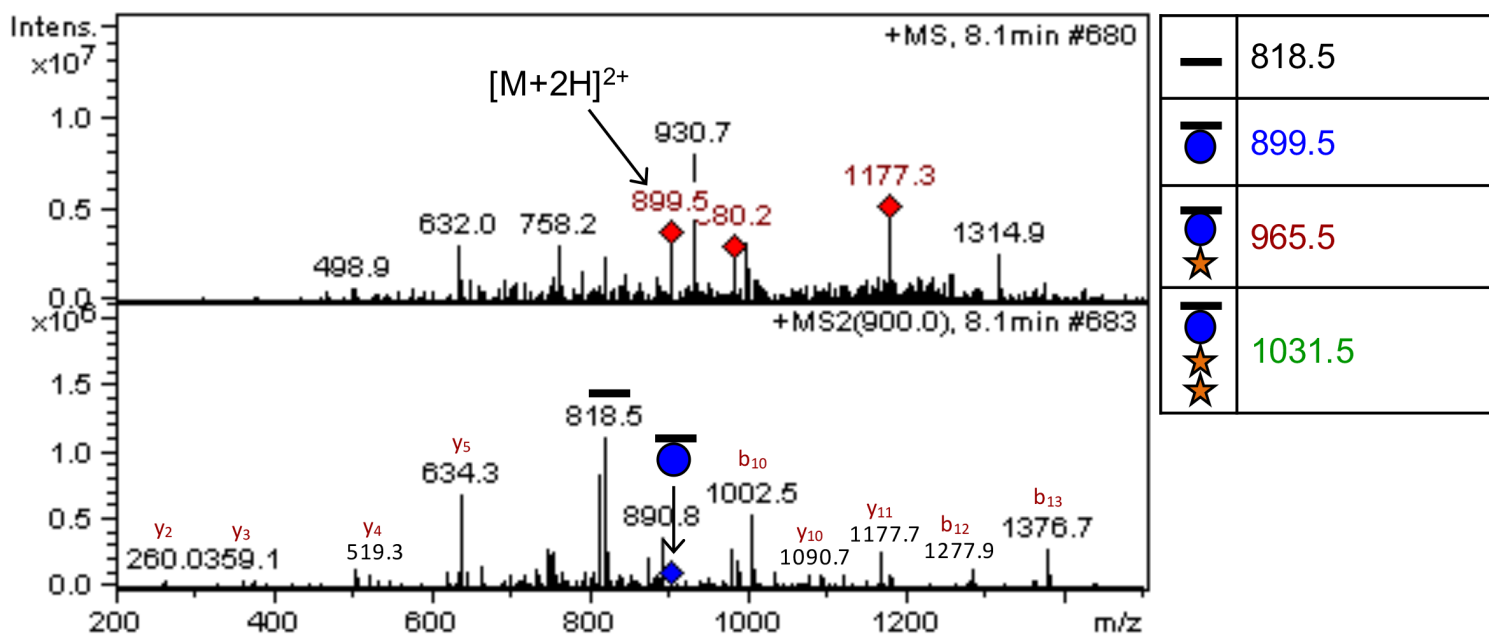

# Fig. S3, Y'

## EGF 35

<sup>1371</sup>NCELSGQDCDSNPCR<sup>1385</sup>

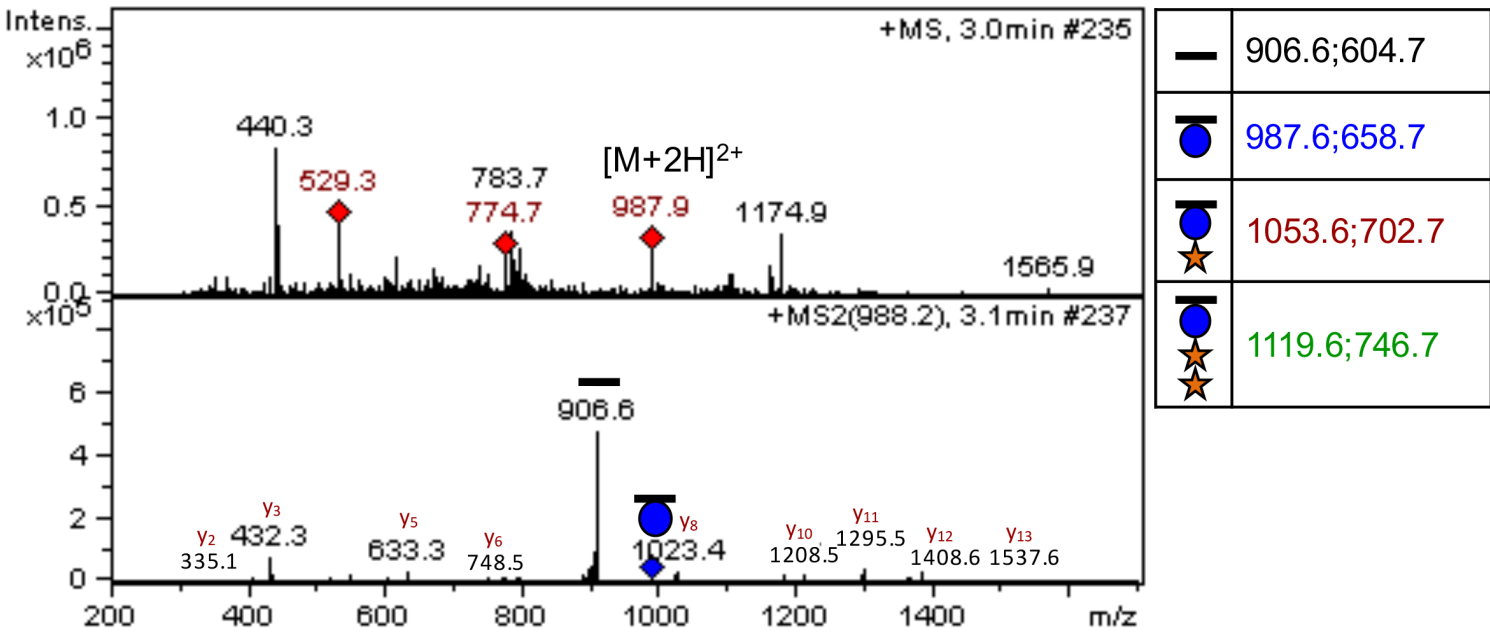

Supplement: 10.1074_M116.732537_jbc.M116.732537-1.pdf [file 10.1074_M116.732537_jbc.M116.732537-1.pdf]
